# Supplementary material for: Towards a structurally resolved human protein interaction network
Source: Research Square preprint supplement (doi:10.21203/rs.3.rs-1098605/v1), 2021-12-16
Supplement: Supplementary file 2 [file 17e0c614487aaff9b734c352.csv]

Name	pDockQ	NumRes	IF_plDDT	plDDT1	plDDT2	NumDiso1+90	NumDiso1-70-90	NumDiso1-50-70	NumDiso1-50	NumDiso2+90	NumDiso2-70-90	NumDiso2-50-70	NumDiso2-50	NumOverlap	len1	len2
O00139-P40429	0.041981	49	65.595918	75.346912	87.722660	232	262	83	129	128	56	15	4	0	706	203
O00231-P31946	0.034794	34	62.204118	75.470284	84.597642	7	289	124	2	88	140	6	12	0	422	246
O00231-Q06330	0.061639	31	84.275161	84.527464	79.542340	84	318	20	0	221	170	33	76	0	422	500
O00231-Q8N488	0.060234	55	71.824909	81.943341	50.807281	59	323	40	0	0	50	29	149	0	422	228
O00231-Q9NWR8	0.031359	3	70.566667	83.936303	71.687143	108	290	23	1	48	178	39	71	0	422	336
O00232-Q7L273	0.031322	0	0.000000	80.965987	82.232468	18	396	34	8	124	214	31	20	0	456	389
O00232-Q9NRA8	0.125369	139	66.573381	82.413772	40.914122	43	372	32	9	0	74	95	816	0	456	985
O00232-Q9UL33	0.032571	14	70.792857	75.915702	83.477714	16	349	76	15	41	84	12	3	0	456	140
O00292-P10321	0.373329	163	75.776012	68.022213	78.416858	12	189	103	62	159	124	24	59	0	366	366
O00303-P31150	0.047576	49	69.105306	69.427171	89.886667	38	206	25	88	333	95	8	11	0	357	447
O00303-Q00653	0.053002	100	60.441900	69.899580	72.005533	30	207	32	88	217	405	56	222	0	357	900
O00303-Q92901	0.032580	29	55.554138	71.106667	86.376634	41	200	28	88	214	161	16	16	0	357	407
O00303-Q9H1M0	0.057594	89	63.418202	70.482773	64.445598	38	188	44	87	63	37	12	72	0	357	184
O00399-P28066	0.110283	31	93.820323	85.579316	90.792656	120	41	14	15	175	50	16	0	0	190	241
O00399-P62899	0.031322	0	0.000000	79.165474	81.844960	68	74	31	17	51	53	9	12	0	190	125
O00399-Q8TCE6	0.357377	96	83.934896	80.682211	85.736443	76	83	12	19	185	128	36	8	0	190	357
O00399-Q9UKZ1	0.031439	7	57.775714	79.184263	64.269137	59	91	21	19	0	270	85	155	0	190	510
O00478-Q08211	0.202421	169	68.575089	71.039743	75.412843	104	261	96	123	319	625	115	211	0	584	1270
O00487-Q08211	0.034047	45	55.592889	74.271548	75.832205	36	186	49	39	334	622	100	214	0	310	1270
O00506-Q9Y5K6	0.084150	128	63.502266	75.933474	55.802066	200	81	59	86	117	103	40	379	0	426	639
O00567-P21281	0.032609	15	69.344667	70.018754	83.116184	54	365	41	134	182	266	34	29	0	594	511
O00571-P28070	0.036406	45	60.822000	68.226888	80.378750	174	217	57	214	141	67	9	47	0	662	264
O14744-Q15697	0.301326	116	78.415690	88.965918	55.582752	468	114	29	26	30	138	6	233	0	637	407
O14777-Q08AG7	0.061542	45	75.996444	76.619486	79.981098	149	314	85	94	1	64	15	2	2	642	82
O14818-P08865	0.031800	8	75.218750	90.800242	75.205288	175	68	5	0	151	50	18	76	0	248	295
O14818-P43034	0.045668	18	91.646667	90.691532	87.392000	175	67	6	0	238	142	20	10	0	248	410
O14818-Q03111	0.420264	112	83.594554	90.684153	54.039678	179	64	5	0	34	160	29	336	0	248	559
O14818-Q13405	0.031322	0	0.000000	92.190242	75.110542	189	57	2	0	69	43	20	34	0	248	166
O14818-Q13595	0.136397	65	79.677231	89.723508	54.038759	153	90	5	0	33	51	13	185	0	248	282
O14818-Q2M329	0.034043	31	61.615806	90.106492	63.774577	169	72	6	1	78	207	41	229	0	248	555
O14818-Q86VZ6	0.198144	95	77.017158	91.277944	58.586420	185	59	4	0	0	83	56	104	0	248	243
O15143-Q6STE5	0.053764	57	69.125614	87.725161	73.325445	278	44	26	24	124	218	30	111	0	372	483
O15143-Q9BRX9	0.062404	26	89.078846	87.594866	92.029524	276	47	21	28	265	32	12	6	0	372	315
O15145-O14972	0.060728	47	74.902979	90.849045	90.450000	125	48	2	3	224	50	17	6	0	178	297
O15145-O95835	0.050335	65	65.651077	89.060674	53.792841	113	58	4	3	194	179	78	679	0	178	1130
O15145-P46087	0.032206	10	76.387000	85.585000	62.206724	51	119	5	3	255	122	42	393	0	178	812
O15212-Q6P1L8	0.051881	25	85.932800	90.329147	80.871655	99	23	5	2	82	32	5	26	0	129	145
O15212-Q96I99	0.043764	36	72.633056	89.406047	88.432755	94	28	3	4	322	71	4	35	0	129	432
O15212-Q9BTT4	0.031322	0	0.000000	90.792248	89.111407	105	15	5	4	90	37	7	1	0	129	135
O15371-O43818	0.045327	54	66.210185	77.604726	81.221284	248	127	83	90	270	108	27	70	0	548	475
O15371-P18124	0.033433	21	66.840476	81.123814	89.110323	299	93	111	45	167	68	3	10	0	548	248
O15371-Q5UCC4	0.037353	46	61.900652	81.515785	70.444313	308	77	117	46	74	93	19	76	0	548	262
O15371-Q92901	0.049935	76	63.120789	77.406095	87.818034	248	133	80	87	237	142	14	14	0	548	407
O15372-Q4VC05	0.058349	68	67.684853	69.442216	45.607381	5	209	87	51	0	31	22	157	0	352	210
O15372-Q96CN9	0.032713	18	65.819444	73.362812	69.198348	18	218	79	37	36	451	101	187	0	352	775
O15511-P78537	0.031322	0	0.000000	84.795166	84.676732	95	24	24	8	100	20	20	13	0	151	153
O15514-Q96BH1	0.033720	17	73.257059	85.913521	66.413856	91	36	4	11	177	56	34	192	0	142	459
O43172-Q6NVY1	0.413423	139	79.684532	79.347989	89.063912	252	150	35	85	298	53	12	23	0	522	386
O43242-O75586	0.031439	5	69.922000	71.981948	66.533008	27	341	80	86	11	144	12	79	0	534	246
O43242-P61964	0.033310	33	57.656970	70.843315	87.864731	9	360	75	90	264	35	6	29	0	534	334
O43242-Q12798	0.031336	2	73.770000	70.136086	71.535523	8	331	112	83	0	130	17	25	0	534	172
O43242-Q13503	0.031523	5	80.308000	69.403483	76.262014	16	308	125	85	33	66	33	12	0	534	144
O43242-Q9NP92	0.033327	26	61.957308	73.877903	77.706993	32	355	78	69	92	265	23	59	0	534	439
O43242-Q9P2H3	0.037671	22	77.203636	74.407528	86.398250	28	383	46	77	328	399	29	21	0	534	777
O43242-Q9Y2L8	0.278203	257	66.366770	76.554719	54.601240	39	375	62	58	0	349	73	417	0	534	839
O43242-Q9Y3B9	0.033640	36	57.619444	76.151554	52.138546	95	302	57	80	0	66	67	149	0	534	282
O43290-O75106	0.143739	103	72.310388	54.071925	87.529153	0	221	188	391	517	167	41	31	0	800	756
O43290-O76038	0.031504	7	64.812857	57.438437	64.338949	0	272	165	363	0	93	157	26	0	800	276
O43290-Q13503	0.035286	24	70.351667	60.906075	81.868542	8	290	209	293	75	35	27	7	0	800	144
O43395-O00567	0.039163	63	59.232698	64.984085	73.252761	38	306	155	184	115	315	30	134	0	683	594
O43402-P35544	0.032140	10	75.306000	88.782048	92.088108	147	46	6	11	66	4	2	2	0	210	74
O43516-Q6P1K2	0.035865	21	74.867143	50.296640	83.792341	0	57	137	309	125	43	6	31	0	503	205
O43660-P49207	0.031332	2	61.065000	76.020623	79.129573	281	76	40	117	20	78	19	0	0	514	117
O60826-P25963	0.065395	48	75.761042	70.273987	74.558044	112	270	94	151	114	104	22	77	0	627	317
O60828-Q9UPM8	0.062629	191	55.303037	54.722189	68.429534	0	70	63	132	28	741	94	274	0	265	1137
O60832-Q8TBN0	0.037428	34	67.317941	77.549825	70.595995	272	100	32	110	150	87	16	129	0	514	382
O60885-O43639	0.228858	121	74.639339	52.186057	75.325316	183	221	100	858	173	104	10	93	0	1362	380
O60925-P49418	0.037805	45	62.866444	87.528033	59.554863	67	48	6	1	228	62	31	374	0	122	695
O60925-P62906	0.031322	0	0.000000	86.169262	78.238065	50	65	5	2	2	186	27	2	0	122	217
O60925-Q6UWV2	0.350325	59	93.642542	91.618525	77.913489	94	23	4	1	119	30	48	38	0	122	235
O75175-P62140	0.050539	58	67.578966	57.918446	88.588991	172	129	39	413	263	24	11	29	0	753	327
O75306-Q9ULJ3	0.315159	227	69.192335	82.950583	47.722270	257	123	37	46	21	265	87	693	0	463	1066
O75431-P33260	0.437278	118	83.331186	85.738897	91.518245	158	80	4	21	361	117	12	0	0	263	490
O75528-Q1MSJ5	0.259693	318	63.266635	69.455116	51.401672	96	154	64	118	3	339	203	711	0	432	1256
O75533-Q9P0V9	0.046202	114	56.179386	66.588735	70.788304	45	765	119	375	36	261	68	89	4	1304	454
O75534-Q8NHQ8	0.062664	68	68.847794	75.990464	69.236683	98	492	113	95	81	184	12	142	0	798	419
O75586-P12277	0.130942	76	76.343553	68.260772	92.745381	56	90	21	79	320	45	10	6	0	246	381
O75586-P62899	0.032172	10	75.843000	72.051016	83.892400	68	91	19	68	67	37	12	9	0	246	125
O75679-P62910	0.137199	42	89.062857	81.439653	86.194074	143	119	13	42	63	63	5	4	0	317	135
O75679-Q14118	0.052859	79	63.653038	77.042618	63.303084	83	163	27	44	181	252	87	375	0	317	895
O75718-P17174	0.073406	30	88.314333	82.619077	95.394915	218	104	34	45	381	31	1	0	0	401	413
O75787-P26885	0.034925	28	66.181071	78.049400	80.731690	81	189	48	32	76	35	3	28	0	350	142
O75792-Q9Y2R9	0.031870	8	77.315000	81.424482	80.921570	75	174	43	7	118	84	7	33	0	299	242
O75821-P20336	0.039628	24	77.802500	64.197875	79.596182	38	108	68	106	113	53	15	39	0	320	220
O75821-Q13901	0.032123	13	67.349231	68.960437	82.028652	69	92	83	76	55	62	16	8	0	320	141
O75821-Q8N4P2	0.632841	266	79.400038	60.722375	88.579880	28	115	48	129	442	174	27	22	0	320	665
O75934-P06396	0.055924	72	66.055556	77.092089	75.160895	17	151	45	12	145	427	106	104	0	225	782
O75934-Q13131	0.051464	31	80.354516	81.795956	72.089732	65	123	29	8	185	198	28	148	0	225	559
O75934-Q6P4R8	0.108888	190	61.280684	80.490267	51.724465	53	128	35	9	102	334	100	763	0	225	1299
O75935-P62888	0.031322	0	0.000000	75.308763	84.090087	42	73	59	12	66	31	12	6	0	186	115
O75947-Q9Y3U8	0.031322	0	0.000000	82.361304	84.012286	37	112	9	3	30	65	9	1	0	161	105
O95154-P37108	0.031322	0	0.000000	95.388912	74.074191	303	22	2	4	55	27	29	25	0	331	136
O95155-P17174	0.074865	130	61.946615	70.719877	92.620581	303	607	47	345	331	79	1	2	0	1302	413
O95602-Q8N6M0	0.035077	34	62.910882	77.336291	76.262628	184	1181	184	171	47	182	25	39	0	1720	293
O95684-P46087	0.163378	146	68.488767	50.390877	62.437180	0	98	50	251	240	135	44	393	0	399	812
O95777-Q4G0F5	0.165356	74	79.437162	88.591667	83.309583	42	50	4	0	181	98	13	44	0	96	336
O95782-Q9Y6A5	0.427180	518	63.312066	80.417216	42.558150	417	404	30	126	5	186	8	639	5	977	838
O96013-P61218	0.143646	141	67.715532	64.896836	69.034882	216	74	23	278	22	55	5	45	0	591	127
O96013-P83916	0.205375	115	74.290348	65.517140	68.435459	220	71	39	261	24	85	23	53	0	591	185
P00325-Q15050	0.042644	21	84.490952	94.216987	67.103589	320	52	3	0	21	182	86	76	0	375	365
P00441-P35544	0.044125	16	94.210625	96.771104	92.421486	149	5	0	0	68	2	3	1	0	154	74
P01889-P17040	0.513213	279	73.203405	77.990552	55.857373	110	168	35	49	38	385	112	508	0	362	1043
P01889-P35711	0.364604	213	71.701549	81.249558	51.149948	178	112	28	44	81	126	82	474	0	362	763
P01889-P36578	0.094941	45	82.630889	78.267486	74.599438	157	115	30	60	164	115	64	84	0	362	427
P01889-P62942	0.278943	71	86.429296	82.868978	93.185278	236	51	20	55	85	22	1	0	0	362	108
P01889-Q15435	0.667872	267	81.959963	76.564779	82.137083	127	138	33	64	226	57	12	65	0	362	360
P01889-Q92993	0.393372	206	73.122379	78.500359	70.435673	140	145	20	57	184	154	26	149	0	362	513
P01889-Q99470	0.343073	89	84.772360	81.772155	82.270332	207	84	16	55	115	59	7	30	0	362	211
P01912-P62136	0.348906	113	80.715487	77.759135	86.201545	121	74	22	49	235	52	10	33	0	266	330
P05165-Q13573	0.061969	78	66.508590	85.258434	56.631362	429	209	34	56	0	116	216	204	0	728	536
P05387-Q13421	0.041570	56	63.105536	60.156870	74.777270	0	54	14	47	33	449	42	106	0	115	630
P05387-Q15528	0.031322	0	0.000000	59.563130	74.538550	0	44	29	42	81	44	26	49	0	115	200
P05388-O95983	0.032246	15	65.458667	73.542808	66.169347	5	236	32	44	8	138	73	72	0	317	291
P05388-P12955	0.032058	10	73.852000	75.641136	94.454990	3	258	13	43	446	30	11	6	0	317	493
P05388-P30405	0.031908	20	54.363000	71.839558	79.741932	0	233	39	45	109	55	1	42	0	317	207
P05388-P62495	0.041832	23	81.274348	71.743533	80.585034	0	237	35	45	64	310	44	19	0	317	437
P05388-Q15417	0.031622	11	59.126364	73.390505	61.997416	2	246	22	47	3	148	44	134	0	317	329
P05388-Q8IWD4	0.066986	68	69.868676	77.621104	41.556416	51	202	23	41	0	15	38	226	0	317	279
P05388-Q8N3R9	0.229974	121	74.691157	77.540757	72.993304	26	238	9	44	125	340	71	139	0	317	675
P07316-Q06830	0.141113	42	89.426905	94.140629	94.110754	155	18	2	0	172	24	1	2	0	175	199
P07900-Q5QGZ9	0.258878	100	79.123700	80.009822	73.098000	327	232	91	82	48	131	36	50	0	732	265
P08263-P46778	0.031322	0	0.000000	94.896937	86.117937	210	11	1	0	65	86	8	1	0	222	160
P09001-Q0JRZ9	0.170812	132	70.343712	75.334828	70.579901	98	139	58	53	327	194	21	268	0	348	810
P09001-Q8NBZ0	0.043478	40	70.355000	79.406063	52.900861	138	128	34	48	41	12	23	168	0	348	244
P09210-Q9Y2R5	0.031322	0	0.000000	94.956351	81.886615	210	10	2	0	69	30	20	11	0	222	130
P09493-O00602	0.052430	47	72.067234	88.980106	80.557761	195	73	15	1	204	15	56	51	0	284	326
P09493-Q9NWS9	0.031343	3	56.516667	92.075352	58.693978	227	41	15	1	14	172	39	225	0	284	450
P09496-Q8N488	0.036539	16	83.803125	69.469435	59.352105	42	88	64	54	28	37	58	105	0	248	228
P09497-P42765	0.420814	103	85.126990	61.338865	95.844030	11	77	68	73	377	16	4	0	0	229	397
P09661-Q9Y4Z0	0.073451	24	94.526667	86.524471	74.039424	175	37	16	27	49	34	26	30	0	255	139
P0C862-Q15648	0.045259	202	49.725198	67.359459	47.811461	84	53	112	84	101	291	148	1041	6	333	1581
P0CG48-Q8N4Q1	0.043827	32	75.148437	86.296307	65.626338	295	345	42	3	19	60	21	42	0	685	142
P0DN37-Q9Y3B9	0.031617	15	52.165333	91.724878	56.032376	124	39	1	0	0	93	52	137	0	164	282
P10321-P62318	0.374132	115	81.377043	82.513033	67.566111	222	72	18	54	37	34	8	47	0	366	126
P10321-Q02878	0.037471	19	80.698947	80.610492	71.041806	211	73	22	60	71	96	73	48	0	366	288
P10321-Q86X76	0.622515	202	82.854901	78.917131	84.158991	179	101	24	62	231	41	10	45	0	366	327
P11021-P61962	0.123658	66	78.248182	83.620199	88.939357	303	257	56	38	236	78	19	9	0	654	342
P11464-Q9Y221	0.092548	36	87.403611	84.715251	90.513222	246	115	19	39	131	43	6	0	0	419	180
P12956-P29083	0.048641	82	61.499146	78.109031	61.705399	122	367	59	61	4	208	52	175	0	609	439
P14868-Q6NW29	0.133881	44	87.654545	92.103054	77.480479	423	43	19	16	89	47	21	31	0	501	188
P15313-P05388	0.031890	17	57.142941	82.434211	70.186909	195	250	24	44	0	225	48	44	0	513	317
P15514-P46783	0.035385	23	71.557826	63.063889	71.454545	36	61	52	103	52	34	46	33	0	252	165
P15880-O43390	0.080584	117	64.198120	74.839795	62.426382	105	98	21	69	0	325	79	229	0	293	633
P15880-O60783	0.031322	0	0.000000	76.640341	79.640703	112	96	24	61	71	30	1	26	0	293	128
P15880-P08865	0.264375	89	81.428427	76.815461	75.571593	110	104	16	63	127	82	15	71	0	293	295
P15880-Q13503	0.031322	0	0.000000	76.662628	79.776181	112	91	31	59	59	44	30	11	0	293	144
P15880-Q49AR2	0.106749	55	79.989636	76.181809	80.088733	140	71	14	68	291	57	10	84	0	293	442
P15880-Q86VG3	0.274673	175	71.169257	79.829556	43.222127	132	87	29	45	0	27	25	169	0	293	221
P15880-Q9BWW4	0.057739	86	63.947209	76.980102	47.732474	119	84	28	62	3	70	24	291	0	293	388
P15880-Q9HD33	0.031474	10	52.308000	78.021706	71.095560	136	74	20	63	75	88	29	58	0	293	250
P15880-Q9NWZ8	0.031809	8	75.523750	79.954164	59.636116	154	66	11	62	9	94	38	101	0	293	242
P15880-Q9NX07	0.037410	36	66.218889	77.580683	71.376167	124	84	22	63	49	135	37	66	0	293	287
P15880-Q9UMS4	0.031870	9	73.163333	75.887201	85.804425	116	92	16	69	278	173	23	30	0	293	504
P15880-Q9Y6J9	0.035229	30	65.598333	75.418498	59.646608	119	85	21	68	71	232	43	276	0	293	622
P17612-Q9P0U4	0.134231	101	71.900198	90.803989	61.783415	266	69	9	7	39	272	84	261	0	351	656
P17980-P05141	0.034971	32	63.747812	76.220683	78.772416	7	322	82	28	15	227	42	14	0	439	298
P17980-P11021	0.032331	28	54.033571	72.865216	78.315902	0	311	95	33	39	496	90	29	0	439	654
P17980-P62424	0.031623	7	72.922857	76.074784	78.863797	5	320	91	23	53	149	45	19	0	439	266
P17980-Q13503	0.031322	0	0.000000	78.485080	74.764792	46	298	75	20	21	75	25	23	0	439	144
P17980-Q13627	0.056520	123	58.868374	76.377312	58.285295	27	306	74	32	229	103	35	396	0	439	763
P17980-Q8N1B4	0.034317	26	65.878077	74.845490	78.962877	4	321	77	37	180	409	66	68	0	439	723
P17980-Q96CW1	0.036165	31	66.971290	74.058793	77.262874	1	317	84	37	47	295	53	40	0	439	435
P17980-Q9BQ87	0.049515	42	72.937143	77.653257	81.848142	58	281	71	29	297	113	49	63	0	439	522
P17980-Q9H9J2	0.059118	55	71.499818	78.811116	75.429940	46	308	61	24	64	173	43	52	0	439	332
P17980-Q9NYK5	0.031884	16	58.265000	77.251526	76.156006	17	319	80	23	25	245	23	45	0	439	338
P17980-Q9UJT1	0.031800	12	62.964167	75.567836	82.890265	5	321	83	30	158	239	35	21	0	439	453
P17980-Q9Y3C4	0.032259	14	67.337857	77.795011	82.308343	32	305	75	27	7	153	14	1	0	439	175
P17987-P04406	0.118159	52	82.404231	87.802608	95.073403	331	184	27	14	310	24	1	0	0	556	335
P17987-P36871	0.042466	26	78.795385	85.576025	93.895214	240	268	32	16	483	74	5	0	0	556	562
P17987-Q13263	0.221005	195	67.547897	86.650881	59.294479	274	238	32	12	11	405	57	362	0	556	835
P17987-Q15528	0.031755	6	85.561667	88.584227	66.434350	352	170	25	9	36	71	28	65	0	556	200
P17987-Q6P2H3	0.168210	190	65.319105	88.003022	56.971063	320	196	28	12	2	322	96	342	0	556	762
P17987-Q969H4	0.135729	105	71.415714	87.738255	63.239875	335	177	27	17	41	329	96	254	0	556	720
P17987-Q9UNX3	0.031339	2	81.520000	86.880000	84.051103	273	242	35	6	48	78	15	4	0	556	145
P18124-O15400	0.036377	29	68.704138	91.369556	75.960881	189	47	9	3	97	87	32	45	0	248	261
P18124-O43813	0.087153	32	89.452187	88.545645	96.083684	148	86	4	10	377	22	0	0	0	248	399
P18124-O75971	0.033693	9	94.300000	91.628669	65.896531	207	29	9	3	30	12	19	37	0	248	98
P18124-O95478	0.031322	0	0.000000	91.041734	83.020423	206	30	7	5	98	122	34	6	0	248	260
P18124-P05067	0.238036	124	74.679194	87.741532	63.983714	134	101	3	10	123	278	74	295	0	248	770
P18124-P08579	0.036905	13	91.433846	92.904435	82.360800	215	21	9	3	139	38	8	40	0	248	225
P18124-P08708	0.031322	0	0.000000	92.145605	77.221185	214	22	9	3	47	41	37	10	0	248	135
P18124-P10253	0.121282	41	88.023659	87.194073	89.063508	140	94	4	10	791	56	18	87	0	248	952
P18124-P12532	0.130480	52	83.632308	88.994234	86.265156	149	86	4	9	306	51	15	45	0	248	417
P18124-P21941	0.336554	77	87.324675	87.783427	83.101129	133	102	3	10	232	186	38	40	0	248	496
P18124-P30101	0.068900	40	80.393750	89.194960	88.213446	151	85	4	8	358	105	8	34	0	248	505
P18124-P32249	0.041344	24	79.703750	90.113105	81.670360	182	54	9	3	171	115	35	40	0	248	361
P18124-P46087	0.044221	54	65.542963	87.820363	61.793608	146	89	3	10	236	142	35	399	0	248	812
P18124-P50750	0.186805	95	76.381158	87.360121	82.116048	131	103	4	10	235	55	35	47	0	248	372
P18124-P62318	0.031322	0	0.000000	92.504153	76.755873	216	20	9	3	60	17	26	23	0	248	126
P18124-P67809	0.034534	18	75.030556	92.528992	55.807407	218	19	9	2	48	43	34	199	0	248	324
P18124-P78368	0.177368	114	72.907105	88.067097	75.861012	134	101	7	6	226	64	11	114	0	248	415
P18124-P82979	0.042980	32	74.494375	91.990040	64.237190	218	18	9	3	20	67	63	60	0	248	210
P18124-Q00688	0.032379	11	75.703636	92.078105	79.411339	211	25	9	3	73	106	13	32	0	248	224
P18124-Q02750	0.211539	98	77.203980	88.178306	77.832188	136	100	9	3	163	115	52	63	0	248	393
P18124-Q07866	0.037785	34	67.835294	87.682298	72.866562	130	104	7	7	164	222	43	144	0	248	573
P18124-Q14185	0.142058	149	66.861409	82.292540	76.262075	88	132	16	12	355	1110	134	266	0	248	1865
P18124-Q15554	0.083165	83	69.581446	90.825040	63.880480	192	44	6	6	118	158	32	234	0	248	542
P18124-Q4VC05	0.031728	10	65.716000	92.750968	51.999381	218	18	9	3	2	30	49	129	0	248	210
P18124-Q6S5L8	0.151081	93	74.470215	90.758024	54.907254	195	42	8	3	50	171	61	348	0	248	630
P18124-Q6WKZ4	0.320545	158	74.343101	90.914637	42.168628	201	35	6	6	55	108	74	1046	0	248	1283
P18124-Q92901	0.033639	16	74.468750	89.548548	89.299803	175	59	4	10	278	104	13	12	0	248	407
P18124-Q93034	0.048409	21	88.871429	87.616411	87.609513	142	91	5	10	474	237	46	23	0	248	780
P18124-Q96A72	0.198088	46	91.602391	92.123387	88.928243	209	27	9	3	106	30	8	4	0	248	148
P18124-Q9BTA9	0.183619	64	83.433437	91.868710	49.865564	210	26	9	3	53	82	84	428	0	248	647
P18124-Q9BYD3	0.031322	0	0.000000	91.100161	78.925820	206	30	5	7	161	77	12	61	0	248	311
P18124-Q9H0U6	0.031322	0	0.000000	92.548266	77.328333	220	16	9	3	88	37	15	40	0	248	180
P18124-Q9NY99	0.055164	47	73.104894	89.007944	77.345566	156	78	4	10	243	153	38	105	0	248	539
P18124-Q9Y281	0.052840	23	88.693913	91.781734	88.814036	206	30	9	3	95	65	5	1	0	248	166
P18124-Q9Y4Z0	0.031528	5	80.782000	92.004798	71.455540	212	24	9	3	44	37	20	38	0	248	139
P18754-Q92993	0.272692	178	70.859551	88.686508	69.861774	309	73	12	27	169	167	23	154	2	421	513
P19387-Q9UKX7	0.050601	65	65.759692	88.209636	57.477201	170	83	21	1	86	100	35	247	0	275	468
P20618-O43741	0.031687	12	59.531667	86.131286	65.778419	180	27	8	26	42	98	51	81	0	241	272
P20618-P38117	0.062745	48	75.064583	84.645311	93.810980	160	40	11	30	208	45	2	0	0	241	255
P20618-P48444	0.287348	104	79.680481	84.593651	79.307260	160	47	6	28	245	153	30	83	0	241	511
P20618-P60660	0.154361	48	87.461250	86.064232	90.356887	171	34	8	28	99	48	4	0	0	241	151
P20618-Q13283	0.034711	33	62.512424	87.263402	61.095279	176	30	14	21	109	88	41	228	0	241	466
P20618-Q9GZR7	0.064577	63	70.592857	84.286929	64.224086	150	58	7	26	191	243	92	333	0	241	859
P20853-P08579	0.505463	106	88.053962	91.101761	78.574800	356	120	18	0	99	74	9	43	0	494	225
P22087-P52292	0.182558	68	82.167647	76.176760	83.885898	192	32	11	86	359	61	37	72	0	321	529
P22087-Q96DV4	0.031392	8	46.455000	76.592430	78.694158	184	45	7	85	156	116	64	44	0	321	380
P22694-P09104	0.208288	58	86.986552	90.212222	94.731406	248	89	2	12	382	45	7	0	0	351	434
P23396-O60934	0.190571	106	74.796415	86.407695	56.909271	140	71	28	4	146	154	57	397	0	243	754
P23396-P08865	0.031387	3	86.203333	84.584733	74.883186	102	111	26	4	129	76	16	74	0	243	295
P23396-P15336	0.041496	37	70.283243	86.680741	52.237901	147	66	25	5	54	48	78	325	0	243	505
P23396-P21953	0.031322	0	0.000000	84.725473	87.080689	114	97	27	5	305	35	3	49	0	243	392
P23396-P43686	0.051525	28	82.838929	82.402593	77.917273	61	149	27	6	38	302	40	38	0	243	418
P23396-P49336	0.065698	72	68.647500	82.855062	72.060043	81	122	34	6	159	130	62	113	0	243	464
P23396-Q13547	0.472108	83	91.441687	82.796543	81.538672	80	128	25	10	336	31	18	97	0	243	482
P23396-Q711Q0	0.292692	222	68.688559	85.797284	35.633575	145	68	13	17	1	60	57	1317	0	243	1435
P23396-Q7Z7F7	0.031322	0	0.000000	87.089012	65.267188	145	71	25	2	10	55	23	40	0	243	128
P23396-Q96L21	0.031403	4	72.897500	85.726049	84.701121	125	87	28	3	112	71	25	6	0	243	214
P23396-Q9H8H2	0.154811	139	68.643669	84.678930	63.669142	105	106	29	3	140	319	50	342	5	243	851
P23396-Q9Y689	0.431769	96	86.876979	85.571111	85.887821	117	97	26	3	107	51	9	12	0	243	179
P24539-P09104	0.031322	0	0.000000	74.194648	95.024240	33	162	16	45	400	28	6	0	0	256	434
P24539-Q9H6A0	0.040834	45	66.100444	73.500000	79.802081	44	141	24	47	196	176	42	57	0	256	471
P24928-P01569	0.032351	26	55.454231	68.118751	71.665291	197	1096	141	536	7	117	35	30	0	1970	189
P24941-P55735	0.230367	143	72.194615	84.561745	85.167671	164	86	30	18	198	74	18	32	0	298	322
P24941-Q02543	0.132686	76	76.491974	86.005235	84.327614	190	64	25	19	80	69	22	5	0	298	176
P25098-Q8N4J0	0.084118	102	66.615392	73.375893	85.003032	156	275	141	117	280	67	20	42	0	689	409
P25205-Q13547	0.043736	64	62.567344	72.532079	76.594212	29	539	125	115	185	179	12	106	0	808	482
P25205-Q9Y483	0.034508	83	49.019036	72.046460	53.620894	34	534	117	123	0	212	102	279	0	808	593
P25705-Q9BT78	0.070796	78	68.449872	84.444141	88.984187	332	148	13	60	233	163	9	1	0	553	406
P25786-O75528	0.032018	22	54.450000	87.794677	65.600787	190	43	7	23	55	172	81	124	0	263	432
P25786-P05423	0.033952	27	63.867778	87.766920	53.982312	178	55	16	14	4	100	56	238	0	263	398
P25786-P18621	0.031329	2	52.765000	88.344144	87.605598	193	41	10	19	120	44	17	3	0	263	184
P25786-P30405	0.267267	67	87.066716	88.603156	82.537488	199	35	17	12	149	15	1	42	0	263	207
P25786-P36873	0.522509	130	85.088231	86.194030	88.723251	173	56	8	26	249	37	13	24	0	263	323
P25786-Q5T653	0.031695	9	67.635556	87.472662	74.047672	181	53	6	23	103	101	25	76	0	263	305
P25786-Q6NVY1	0.088073	33	88.826364	86.579924	91.595829	183	44	9	27	330	21	14	21	0	263	386
P25786-Q92901	0.031322	0	0.000000	87.005627	87.611057	173	60	7	23	236	140	15	16	0	263	407
P25786-Q9NXX6	0.031713	8	72.176250	87.643384	66.523247	183	51	7	22	52	146	76	111	0	263	385
P25786-Q9P0W2	0.050639	33	78.527273	87.777719	71.202808	189	43	10	21	44	171	20	82	0	263	317
P25787-O43143	0.104704	77	73.568961	88.874103	83.281031	163	54	13	4	417	252	50	76	0	234	795
P25787-P08865	0.031764	6	85.943333	92.414872	76.199356	186	42	5	1	161	46	14	74	0	234	295
P25787-P50607	0.304838	143	75.243706	90.937821	62.174111	179	45	8	2	137	100	43	226	0	234	506
P25787-Q14839	0.375396	163	75.849018	85.699444	62.254623	114	91	24	5	150	825	253	684	0	234	1912
P25787-Q6NYC1	0.047145	30	78.816667	91.207821	83.634739	180	44	8	2	280	55	4	64	0	234	403
P25787-Q6UX04	0.032912	15	71.817333	90.456111	68.746377	167	61	6	0	66	191	109	106	0	234	472
P25787-Q86XP3	0.058250	73	66.537123	90.039786	62.933593	170	50	11	3	246	212	49	431	0	234	938
P25787-Q9NY65	0.447307	140	80.822929	88.640641	88.966904	159	49	22	4	318	96	25	10	0	234	449
P25787-Q9NZ43	0.051687	28	82.917143	92.942137	75.064903	188	40	6	0	11	191	32	25	0	234	259
P25788-O00459	0.096989	35	88.783429	91.171922	80.616566	193	49	7	6	234	357	70	67	0	255	728
P25788-P61964	0.267421	66	87.386667	91.242471	91.378862	196	42	11	6	293	10	3	28	0	255	334
P25788-Q12798	0.397583	82	88.579390	93.016627	80.817849	209	35	7	4	52	93	5	22	0	255	172
P25788-Q9NXF1	0.043616	40	70.454000	90.706471	73.016588	188	52	12	3	58	589	131	151	0	255	929
P25788-Q9UH03	0.078242	40	82.426750	91.448980	75.693715	198	43	9	5	91	166	34	67	0	255	358
P25788-Q9UKA8	0.044688	31	76.470968	92.659098	65.738631	202	43	6	4	59	56	55	71	0	255	241
P25788-Q9Y5A6	0.055874	60	68.980667	91.387647	61.979133	195	46	9	5	15	247	29	182	0	255	473
P25788-Q9Y5U2	0.042184	37	70.867838	93.848784	47.156991	214	34	4	3	0	53	32	244	0	255	329
P25789-P17252	0.102596	70	74.976571	88.752107	76.940833	173	66	18	4	244	243	92	93	0	261	672
P25789-P49589	0.075374	32	87.115938	87.636092	87.604492	162	74	21	4	412	277	51	8	0	261	748
P25789-Q6ZV89	0.087425	127	64.032441	89.453142	55.535981	166	82	13	0	9	169	45	200	0	261	423
P25789-Q7Z4N8	0.050746	25	85.356000	89.147510	85.191912	170	74	17	0	302	176	36	30	0	261	544
P25789-Q96CW1	0.164081	89	76.087416	87.831762	84.150092	158	79	18	6	218	151	36	30	0	261	435
P25789-Q9BXV9	0.033168	19	67.666842	92.906475	63.995800	213	40	8	0	4	43	11	42	0	261	100
P25963-P52815	0.116526	61	79.037377	80.997666	61.971263	171	60	52	34	6	96	16	80	0	317	198
P25963-P62888	0.031352	3	65.583333	78.984038	84.730000	146	84	41	46	77	19	13	6	0	317	115
P26196-P09417	0.042533	21	84.386190	78.812319	92.633852	234	133	38	78	215	19	1	9	0	483	244
P26373-O95347	0.070016	39	81.217436	72.353839	81.880234	14	123	54	20	151	917	86	43	0	211	1197
P26373-O95861	0.031338	2	79.665000	78.186777	93.953182	33	132	41	5	265	37	4	2	0	211	308
P26373-P05013	0.031322	0	0.000000	83.098673	78.775079	74	108	29	0	64	79	30	16	0	211	189
P26373-P08865	0.031329	2	50.455000	79.350237	76.450780	36	135	33	7	152	57	17	69	0	211	295
P26373-P13693	0.031322	0	0.000000	82.677773	84.548488	68	111	32	0	109	35	13	15	0	211	172
P26373-P19338	0.072125	69	70.695362	80.106730	61.367127	53	114	41	3	76	228	36	370	0	211	710
P26373-P22061	0.031474	6	67.318333	78.619716	94.932070	38	128	39	6	210	11	3	3	0	211	227
P26373-P24863	0.031322	0	0.000000	79.946967	87.625194	42	134	28	7	206	50	4	23	0	211	283
P26373-P26885	0.031338	2	79.205000	83.034171	79.922817	74	103	32	2	70	41	5	26	0	211	142
P26373-P28715	0.041272	51	64.364706	77.855355	57.370472	35	129	37	10	80	379	145	582	0	211	1186
P26373-P30049	0.032999	15	72.444000	81.399810	80.841726	54	122	34	1	98	35	4	31	0	211	168
P26373-P31150	0.033599	16	74.267500	72.928815	89.797830	23	115	44	29	323	103	10	11	0	211	447
P26373-P31937	0.031575	8	65.602500	75.405166	88.971310	24	125	48	14	285	9	3	39	0	211	336
P26373-P36959	0.032157	10	75.593000	74.972322	93.700116	23	122	51	15	289	49	7	0	0	211	345
P26373-P46087	0.035388	48	57.963125	75.110995	62.048719	22	123	52	14	233	138	46	395	0	211	812
P26373-P52434	0.031322	0	0.000000	81.962417	82.452533	57	122	32	0	50	73	26	1	0	211	150
P26373-Q13888	0.031322	0	0.000000	76.136114	81.356506	34	120	35	22	152	151	68	24	0	211	395
P26373-Q15417	0.031665	12	58.732500	80.611137	65.543252	53	117	39	2	72	82	58	117	0	211	329
P26373-Q562F6	0.186938	169	67.811361	80.549668	41.960577	54	111	46	0	68	37	73	1087	2	211	1265
P26373-Q8IYM2	0.031682	18	51.026667	78.776445	79.420035	35	128	43	5	214	254	30	80	0	211	578
P26373-Q8N3I7	0.031431	7	56.614286	81.585829	85.208768	48	134	29	0	192	99	32	18	0	211	341
P26373-Q96A08	0.031533	7	67.214286	83.154645	77.864646	64	120	27	0	81	10	8	28	0	211	127
P26373-Q96E09	0.063484	53	73.385660	84.196019	49.699791	83	94	33	1	0	29	66	192	0	211	287
P26373-Q96L21	0.031389	5	59.350000	80.730332	86.835841	37	139	35	0	123	70	18	3	0	211	214
P26373-Q96NB3	0.033863	20	69.899500	83.500569	62.321183	71	122	18	0	50	110	51	161	0	211	372
P26373-Q99627	0.031343	3	56.266667	82.907488	79.135646	63	127	21	0	44	126	14	25	0	211	209
P26373-Q99798	0.035660	28	67.960000	71.573744	91.932987	20	111	53	27	633	113	7	27	0	211	780
P26373-Q9BYD3	0.031322	0	0.000000	82.267678	79.816399	63	115	33	0	173	66	13	59	0	211	311
P26373-Q9NUU7	0.031526	11	54.070909	74.837678	79.243640	24	126	46	15	192	173	54	59	0	211	478
P26373-Q9NYL9	0.034845	32	63.424688	77.547488	77.987131	27	135	38	11	114	128	88	22	0	211	352
P26373-Q9UJA3	0.034782	39	59.844359	76.289147	73.596917	20	138	44	9	110	491	102	137	0	211	840
P26373-Q9UL18	0.033424	45	53.423111	70.567630	87.539008	4	115	71	21	546	249	26	36	0	211	857
P26373-Q9UQL6	0.075123	114	63.706579	76.051801	61.940169	27	131	43	10	315	188	76	543	0	211	1122
P26641-Q0VGL1	0.035475	15	83.108667	85.573638	78.801111	282	101	6	48	30	45	12	12	0	437	99
P27635-O14770	0.078623	72	71.162361	86.056963	53.520881	133	47	31	3	30	113	36	298	0	214	477
P27635-O43491	0.049143	63	65.636349	84.562477	56.462816	114	64	34	2	235	125	96	549	0	214	1005
P27635-O75489	0.031322	0	0.000000	83.775654	74.628598	109	65	33	7	112	66	30	56	0	214	264
P27635-P08754	0.066880	28	88.443571	83.183411	90.446695	112	57	37	8	258	79	12	5	0	214	354
P27635-P08865	0.041849	29	75.694483	82.658318	75.493797	91	81	38	4	135	70	19	71	0	214	295
P27635-P11021	0.298686	71	87.328310	82.345748	85.379511	97	68	44	5	342	241	40	31	0	214	654
P27635-P11766	0.033345	12	81.349167	82.672617	95.480107	112	57	26	19	351	21	2	0	0	214	374
P27635-P13804	0.031377	3	81.506667	83.887991	89.886577	110	62	40	2	251	62	6	14	0	214	333
P27635-P25789	0.035213	28	66.918929	82.588832	91.028084	109	64	27	14	184	64	13	0	0	214	261
P27635-P28161	0.031322	0	0.000000	83.391636	96.667110	124	46	23	21	215	3	0	0	0	214	218
P27635-P35544	0.031322	0	0.000000	87.442056	90.145270	135	53	25	1	57	14	2	1	0	214	74
P27635-P55735	0.031709	5	93.084000	84.152150	88.259068	123	49	34	8	232	53	19	18	0	214	322
P27635-P60842	0.116361	64	78.108125	81.552009	83.821601	91	74	39	10	190	155	41	20	0	214	406
P27635-P61927	0.031622	7	72.842857	86.696402	71.213299	128	61	24	1	12	31	49	5	0	214	97
P27635-P62314	0.031603	12	56.225000	87.774953	77.304454	131	60	22	1	54	26	15	24	0	214	119
P27635-P67775	0.047584	36	75.055278	83.041916	92.511359	109	60	34	11	266	26	5	12	0	214	309
P27635-P78346	0.031322	0	0.000000	86.516729	84.417201	118	71	24	1	155	76	17	20	0	214	268
P27635-Q00839	0.050976	99	59.875657	80.973411	63.650982	79	88	34	13	281	130	40	374	0	214	825
P27635-Q04726	0.079502	103	65.799903	81.055187	64.924611	91	77	26	20	271	146	20	335	0	214	772
P27635-Q08AG7	0.032766	8	92.062500	85.440421	83.986463	124	55	33	2	38	32	12	0	0	214	82
P27635-Q13084	0.031703	8	71.796250	84.641916	85.222773	123	52	30	9	134	93	18	11	0	214	256
P27635-Q13601	0.031322	0	0.000000	86.356168	77.279081	110	86	16	2	134	145	54	48	0	214	381
P27635-Q15528	0.031797	15	57.686000	84.731262	73.326100	117	61	32	4	82	43	24	51	0	214	200
P27635-Q16643	0.090370	54	78.204074	87.288551	56.710139	129	65	19	1	77	131	78	363	0	214	649
P27635-Q6P1K2	0.031322	0	0.000000	87.628131	79.244829	129	69	13	3	76	84	13	32	0	214	205
P27635-Q8NCG5	0.045091	28	79.095357	83.761636	84.065959	119	52	30	13	193	134	42	17	0	214	386
P27635-Q96BM1	0.033822	14	79.149286	85.252523	78.443470	114	65	32	3	96	147	40	34	0	214	317
P27635-Q9BYC9	0.031322	0	0.000000	85.500000	83.636107	127	49	36	2	100	14	23	12	0	214	149
P27635-Q9BYN8	0.031322	0	0.000000	87.814860	81.262293	139	50	24	1	85	86	19	15	0	214	205
P27635-Q9NY33	0.211581	54	88.741296	85.806963	90.038833	125	59	27	3	497	210	22	8	0	214	737
P27635-Q9UKT7	0.111694	61	78.526393	83.673645	86.798668	109	58	41	6	287	90	13	38	0	214	428
P27635-Q9UN72	0.032237	24	55.686667	80.681636	72.155443	88	76	34	16	236	394	53	254	0	214	937
P27635-Q9Y4K4	0.135203	138	67.416377	81.905607	69.503511	100	69	29	16	233	302	57	254	0	214	846
P27635-Q9Y6Q5	0.133347	72	77.515417	84.545000	86.430757	112	69	27	6	239	137	34	13	0	214	423
P27694-Q15124	0.099056	38	87.075000	79.762143	93.162628	267	229	45	75	479	67	19	2	0	616	567
P28066-P18077	0.073135	46	78.397609	90.276058	87.497364	172	54	13	2	64	39	5	2	0	241	110
P28066-P30876	0.037227	30	69.480333	84.187469	83.535877	99	115	20	7	335	703	110	26	0	241	1174
P28066-P38646	0.306488	99	81.333030	88.405187	82.204845	152	70	15	4	306	275	27	71	0	241	679
P28066-P53618	0.047663	43	71.551628	87.333112	79.962361	149	68	19	5	230	564	68	91	0	241	953
P28066-Q00534	0.103033	121	66.465289	86.421120	76.464540	139	70	21	11	100	121	63	42	0	241	326
P28066-Q02252	0.031322	0	0.000000	90.332656	91.360879	168	57	15	1	467	19	19	30	0	241	535
P28066-Q9NP92	0.052753	39	75.873590	89.586598	82.314875	166	57	17	1	238	121	27	53	0	241	439
P28070-O94992	0.035711	46	59.245870	84.750758	53.903315	188	27	13	36	26	84	43	206	0	264	359
P28070-P62826	0.050343	34	77.719118	83.074091	82.673750	165	44	20	35	94	86	20	16	0	264	216
P28070-Q96HY6	0.053550	50	71.360600	84.932235	69.059936	185	30	19	30	12	174	47	81	0	264	314
P28070-Q9Y5G1	0.101497	168	62.059226	79.340152	69.411324	130	78	9	47	88	507	84	250	0	264	929
P28072-O43242	0.054791	67	66.817612	81.989958	73.590787	129	68	5	37	38	343	73	80	0	239	534
P28072-Q9Y5G3	0.054988	102	60.805000	81.622971	70.198328	129	68	3	39	108	504	63	252	0	239	927
P28074-P37837	0.033033	9	89.577778	79.373764	93.540030	155	45	4	59	302	20	6	9	0	263	337
P28074-Q96BD8	0.034029	21	69.440952	80.840608	73.947765	177	24	6	56	28	152	39	36	0	263	255
P28074-Q96L21	0.063093	55	72.605818	79.709011	82.945701	160	41	5	57	102	69	35	8	0	263	214
P28161-O94903	0.038660	29	72.248621	96.143807	86.766982	209	9	0	0	202	35	3	35	0	218	275
P29083-Q9NQ50	0.032077	29	50.741724	66.054715	68.060631	13	213	81	132	49	50	57	50	4	439	206
P29692-Q13888	0.075967	74	70.253108	68.182811	80.615848	24	148	33	76	144	155	72	24	0	281	395
P29692-Q6UXN7	0.031373	4	63.175000	69.027260	74.842632	32	131	56	62	6	103	31	12	0	281	152
P30050-O43402	0.031322	0	0.000000	75.347212	85.077381	0	130	29	6	116	74	6	14	0	165	210
P30050-O75947	0.031707	8	71.961250	72.040970	73.032174	0	119	40	6	15	76	64	6	0	165	161
P30050-P12882	0.047292	53	67.595283	80.058909	70.557963	22	118	21	4	166	679	1026	68	0	165	1939
P30050-P55209	0.032462	17	64.921176	76.485273	74.783555	0	131	30	4	158	86	61	86	0	165	391
P30050-P62314	0.031322	0	0.000000	72.315455	74.565126	0	116	43	6	44	31	20	24	0	165	119
P30050-Q13620	0.033727	21	68.207143	79.833939	74.025542	6	134	24	1	218	457	33	205	0	165	913
P30050-Q13838	0.037694	35	67.154571	78.004667	81.230514	0	141	18	6	210	141	27	50	0	165	428
P30050-Q8WXX7	0.175134	152	68.609605	84.032182	39.336616	51	93	18	3	2	39	80	1138	0	165	1259
P30050-Q92599	0.031322	0	0.000000	79.832121	72.713954	5	135	24	1	51	268	71	93	0	165	483
P30050-Q96LT9	0.031835	10	68.919000	87.604364	63.600368	95	56	14	0	82	151	76	208	0	165	517
P30050-Q99848	0.055920	34	80.108529	79.279758	69.012451	7	131	26	1	34	135	81	56	0	165	306
P30050-Q99935	0.031621	13	55.225385	81.578000	40.971452	28	110	26	1	0	19	27	202	0	165	248
P30050-Q9BVA0	0.031322	0	0.000000	80.087273	76.528565	9	132	21	3	296	177	44	138	0	165	655
P30050-Q9NRX2	0.031322	0	0.000000	74.845152	84.610571	0	124	39	2	105	38	24	8	0	165	175
P30050-Q9UGJ1	0.040226	44	65.930682	79.675152	78.424813	6	135	21	3	202	329	41	95	0	165	667
P30050-Q9Y6B6	0.038779	39	66.546667	78.490303	79.628384	0	138	25	2	72	80	25	21	0	165	198
P30153-Q9P278	0.264613	208	68.486827	90.777301	51.164165	451	123	7	8	98	292	81	643	0	589	1114
P31946-P33316	0.491166	181	78.439890	89.404878	66.276349	187	42	6	11	91	40	12	109	0	246	252
P31946-Q03701	0.073991	82	68.268780	87.717276	64.488311	166	63	6	11	129	424	128	373	0	246	1054
P31946-Q96GS4	0.301218	119	77.992437	91.451301	55.790112	201	30	5	10	93	27	29	208	0	246	357
P31946-Q9NY12	0.220166	129	73.251318	91.078699	58.759862	196	35	4	11	52	39	10	116	0	246	217
P32189-P16930	0.054280	21	92.041905	88.245206	95.850859	368	134	42	15	395	23	1	0	0	559	419
P32969-P05023	0.042724	26	79.022692	86.427500	80.606188	75	107	9	1	173	721	83	46	0	192	1023
P32969-P18621	0.031322	0	0.000000	90.614479	88.424293	133	55	3	1	128	41	13	2	0	192	184
P32969-P22694	0.187085	57	86.049825	87.523438	91.523419	106	73	12	1	276	59	6	10	0	192	351
P32969-P49746	0.037602	17	84.106471	89.152396	80.172082	119	69	3	1	279	510	110	57	0	192	956
P32969-Q92882	0.033152	15	73.467333	89.447813	81.506916	119	68	4	1	72	100	29	13	0	192	214
P32969-Q96EL2	0.031372	3	79.130000	91.914479	66.964611	152	36	3	1	36	51	30	50	0	192	167
P32969-Q9BV81	0.031322	0	0.000000	88.610313	81.191000	102	84	5	1	43	47	12	8	0	192	110
P32969-Q9BYC9	0.077217	36	84.640556	90.547708	83.833423	130	57	4	1	100	19	12	18	0	192	149
P32969-Q9UL63	0.032028	10	73.282000	89.909740	87.158136	127	59	5	1	465	184	50	36	0	192	735
P33261-Q8N3R9	0.326650	151	75.240000	89.584347	71.306578	325	146	15	4	93	362	72	148	0	490	675
P33991-Q9Y5G0	0.233532	300	62.938967	71.220510	64.194507	75	498	133	157	0	532	136	255	9	863	923
P35268-P06756	0.036542	25	72.190000	76.877422	84.680620	45	50	7	26	566	350	47	85	0	128	1048
P35268-P07910	0.090760	52	79.008846	82.772734	68.009379	73	25	24	6	87	38	113	68	0	128	306
P35268-P16930	0.054061	24	88.075833	78.575156	96.994630	64	30	9	25	402	17	0	0	0	128	419
P35268-P52655	0.034408	21	70.812381	82.865391	53.808005	77	22	23	6	59	36	71	210	0	128	376
P35268-P62306	0.035564	20	75.355000	84.155547	87.376628	87	12	14	15	60	13	6	7	0	128	86
P35268-P63104	0.268209	74	85.100676	81.310156	92.398449	77	22	3	26	211	20	4	10	0	128	245
P35268-Q13618	0.031542	4	95.227500	79.237500	89.374154	69	30	2	27	597	106	25	40	0	128	768
P35268-Q15528	0.031322	0	0.000000	83.015156	77.551350	81	19	11	17	103	26	28	43	0	128	200
P35268-Q3SXY8	0.165203	75	79.179867	79.105703	70.288949	55	42	8	23	167	72	45	144	0	128	428
P35268-Q8TB22	0.311469	97	81.901031	76.538750	89.768931	40	54	8	26	612	111	6	57	0	128	786
P35268-Q96DE0	0.163327	57	84.417895	80.570938	88.700051	71	28	6	23	131	46	12	6	0	128	195
P35268-Q96L21	0.031534	6	73.071667	79.917188	87.703037	64	34	8	22	132	64	15	3	0	128	214
P35268-Q9NV88	0.195276	54	87.743519	75.778750	89.497006	48	46	7	27	444	178	16	20	0	128	658
P35268-Q9Y5F1	0.031487	4	88.725000	76.713203	81.307572	49	44	8	27	399	252	30	114	0	128	795
P35998-O75874	0.073347	34	85.166471	76.035751	92.446425	20	305	81	27	325	85	2	2	0	433	414
P35998-P16989	0.032226	25	54.860000	77.921940	48.858790	40	291	77	25	30	56	10	276	0	433	372
P35998-P35227	0.031616	9	64.252222	78.248430	60.525058	32	305	80	16	14	152	27	151	0	433	344
P35998-P60842	0.086443	74	71.926486	76.579838	81.071675	18	311	76	28	127	214	42	23	0	433	406
P35998-Q13838	0.043940	48	67.353125	75.005843	78.450935	7	309	85	32	135	204	37	52	0	433	428
P35998-Q8TCC3	0.032100	16	61.968750	77.464226	60.301739	25	311	74	23	7	51	53	50	0	433	161
P35998-Q92769	0.033414	17	71.727059	75.765404	79.525512	20	299	81	33	320	46	6	116	0	433	488
P35998-Q96ES7	0.031467	5	73.972000	76.494296	79.728294	18	301	94	20	38	205	34	16	0	433	293
P35998-Q9BZ72	0.036747	125	48.381600	75.880162	63.662431	51	262	77	43	209	534	103	503	0	433	1349
P36578-O00425	0.031732	7	77.887143	74.875152	76.749741	150	130	75	72	114	328	41	96	0	427	579
P36578-O15540	0.036515	16	83.751250	76.666019	85.229773	156	150	54	67	26	103	3	0	0	427	132
P36578-O60232	0.031785	6	86.745000	78.782998	72.368543	187	127	52	61	66	58	31	44	0	427	199
P36578-O95336	0.031350	3	63.796667	75.961452	90.510426	156	135	71	65	201	48	5	4	0	427	258
P36578-O95478	0.032239	22	57.273636	77.209227	79.209423	173	138	51	65	64	142	35	19	0	427	260
P36578-P02462	0.110267	380	54.235947	72.838946	33.010785	88	198	53	88	0	0	1	1668	0	427	1669
P36578-P07954	0.033789	22	67.440455	72.406534	89.168412	103	163	87	74	415	44	4	47	0	427	510
P36578-P08865	0.035699	22	73.355455	74.658946	75.990915	119	166	74	68	151	61	10	73	0	427	295
P36578-P09661	0.031322	0	0.000000	77.094637	83.077176	171	124	63	69	151	58	12	34	0	427	255
P36578-P09960	0.087476	43	82.478140	73.315808	95.012390	141	125	89	72	573	35	2	1	0	427	611
P36578-P12236	0.031442	7	58.151429	75.184941	83.583758	151	143	66	67	76	200	22	0	0	427	298
P36578-P30405	0.031322	0	0.000000	76.942553	80.704300	175	127	55	70	126	38	1	42	0	427	207
P36578-P51970	0.031668	14	55.411429	77.913021	80.450640	174	139	54	60	71	61	29	11	0	427	172
P36578-P55198	0.040387	143	50.388671	76.786230	45.521382	181	112	63	71	76	165	35	817	0	427	1093
P36578-P78345	0.031811	12	63.253333	78.265082	64.866537	191	120	52	64	82	57	30	114	0	427	283
P36578-Q03060	0.033782	41	56.111707	76.783302	48.419014	162	141	57	67	38	39	27	241	0	427	345
P36578-Q13084	0.031322	0	0.000000	78.091827	87.556992	173	133	60	61	139	103	12	2	0	427	256
P36578-Q13363	0.062389	96	63.582188	74.731007	76.983659	134	154	71	68	222	108	7	103	0	427	440
P36578-Q13610	0.158285	75	78.701200	75.354262	77.202655	136	154	66	71	224	133	53	91	0	427	501
P36578-Q6ZNE5	0.031689	13	57.740000	78.176511	67.289675	176	133	60	58	83	177	86	146	0	427	492
P36578-Q71UM5	0.056231	36	78.946389	76.953513	85.138452	169	135	56	67	44	31	7	2	0	427	84
P36578-Q86WV5	0.032545	8	89.530000	78.415222	87.703089	183	123	60	61	72	41	7	3	0	427	123
P36578-Q8WXH5	0.044615	100	56.984400	76.669742	58.595932	182	111	61	73	96	95	21	228	0	427	440
P36578-Q9BYD3	0.034575	32	62.690625	75.891475	77.084437	171	125	49	82	137	98	7	69	0	427	311
P36578-Q9H7B2	0.032213	22	56.981818	76.271686	84.999379	156	141	62	68	135	144	21	6	0	427	306
P36578-Q9NUP9	0.032926	15	71.920000	75.648970	78.972132	165	131	44	87	48	102	39	8	0	427	197
P36578-Q9NVP2	0.033037	15	72.711333	78.848033	77.806733	198	117	53	59	93	60	2	47	0	427	202
P36578-Q9NWB7	0.037212	27	71.677407	78.341827	71.416760	178	144	44	61	31	248	56	94	0	427	429
P36578-Q9P209	0.045339	87	59.145862	76.404122	61.813045	173	118	69	67	78	245	52	272	0	427	647
P36578-Q9P2W9	0.032563	18	64.568333	78.307681	70.132269	181	133	52	61	32	180	42	81	0	427	335
P36578-Q9UBI1	0.031836	8	76.332500	77.249883	80.927590	179	122	55	71	25	137	33	0	0	427	195
P36578-Q9UHE8	0.031827	11	65.964545	78.426745	77.230826	173	145	51	58	143	112	11	73	0	427	339
P36578-Q9UHV9	0.031332	2	64.160000	78.565152	74.085909	191	123	55	58	70	34	12	38	0	427	154
P36578-Q9UJ68	0.031381	7	47.178571	76.026323	85.209106	171	117	60	79	178	24	3	30	0	427	235
P36578-Q9UPN7	0.110935	200	60.863150	73.170960	62.255755	141	130	77	79	198	245	50	388	0	427	881
P36578-Q9Y291	0.031332	2	61.040000	77.654169	81.620472	182	124	54	67	3	97	6	0	0	427	106
P36578-Q9Y399	0.031540	13	51.344615	76.326674	77.246858	173	121	59	74	168	48	6	74	0	427	296
P36873-P16402	0.350914	97	83.488969	91.516780	54.941086	276	16	13	18	13	59	10	139	0	323	221
P36873-P49450	0.106855	43	85.237442	91.320712	75.497214	274	18	11	20	51	41	22	26	0	323	140
P36957-Q9H8H0	0.206884	225	65.151467	72.168962	74.714993	166	140	4	143	132	383	102	102	0	453	719
P38405-O60645	0.129198	46	86.185000	86.893596	85.183221	221	131	14	15	335	351	42	17	0	381	745
P38646-Q13573	0.086927	77	71.337922	81.371399	61.101231	262	315	36	66	2	190	192	152	0	679	536
P39019-Q14197	0.033896	18	72.591667	91.354207	76.191019	114	30	0	1	100	34	20	52	0	145	206
P39019-Q9H2Y7	0.062169	86	65.099419	87.846414	44.586336	73	69	2	1	198	262	68	1355	0	145	1883
P39019-Q9UI08	0.031587	7	70.844286	91.105034	65.087428	105	37	2	1	116	71	59	170	0	145	416
P39023-O00165	0.255203	158	71.824494	88.924218	44.617957	240	145	11	7	0	36	39	204	0	403	279
P39023-O00273	0.066152	47	76.365957	89.012233	71.901360	250	133	9	11	21	203	28	79	0	403	331
P39023-O15482	0.112290	64	77.683594	89.744888	67.499732	266	120	9	8	100	128	47	135	2	403	410
P39023-O43707	0.049365	39	74.338718	87.944367	80.524984	213	169	15	6	128	644	92	47	0	403	911
P39023-O60244	0.037593	102	51.511961	86.068462	69.878494	189	177	23	14	138	798	202	316	6	403	1454
P39023-O75717	0.069940	116	62.580000	82.629429	71.534473	167	163	57	16	479	268	33	349	0	403	1129
P39023-O75934	0.031322	0	0.000000	90.370248	80.076133	280	106	8	9	65	112	34	14	0	403	225
P39023-O95299	0.031756	12	61.715000	87.505583	77.902197	228	147	17	11	122	154	34	45	0	403	355
P39023-P08865	0.034233	20	71.346500	88.260620	74.497898	227	156	4	16	133	72	15	75	0	403	295
P39023-P17568	0.031322	0	0.000000	88.455484	78.810438	232	150	12	9	39	65	21	12	0	403	137
P39023-P20339	0.079799	44	80.644545	89.851464	77.578326	260	127	11	5	93	71	4	47	0	403	215
P39023-P26885	0.057848	27	86.466296	88.583945	79.797113	247	132	11	13	75	36	3	28	0	403	142
P39023-P42696	0.118747	93	71.888925	88.987990	61.092581	245	139	11	8	58	139	34	199	0	403	430
P39023-P63172	0.031322	0	0.000000	90.665360	88.778584	290	95	12	6	77	28	8	0	0	403	113
P39023-Q00839	0.342007	252	68.780675	83.708015	62.408994	185	158	43	17	233	174	41	377	0	403	825
P39023-Q13363	0.043392	73	60.436575	85.140149	77.663205	211	145	26	21	255	75	3	107	0	403	440
P39023-Q13838	0.066782	50	75.311200	86.714318	80.466799	214	153	24	12	194	154	30	50	0	403	428
P39023-Q3SYG4	0.123737	122	68.247869	86.805881	79.377711	209	164	18	12	340	359	87	101	0	403	887
P39023-Q7Z4G1	0.031322	0	0.000000	89.777419	75.264471	267	116	11	9	18	47	5	15	0	403	85
P39023-Q7Z7C8	0.313486	168	73.195655	88.053722	62.930387	226	156	12	9	39	99	79	93	5	403	310
P39023-Q7Z7F7	0.033407	16	73.258125	89.288089	62.295703	245	144	9	5	3	54	29	42	0	403	128
P39023-Q92624	0.048540	34	76.798824	85.891216	91.405077	203	160	27	13	485	68	19	13	0	403	585
P39023-Q92785	0.279059	149	73.630537	86.869380	59.626777	193	182	19	9	21	133	76	161	0	403	391
P39023-Q92901	0.060104	45	75.572000	88.376005	88.281499	224	161	8	10	238	141	15	13	0	403	407
P39023-Q96JN8	0.200896	125	72.780800	85.379181	73.897234	189	175	20	19	482	657	49	374	0	403	1562
P39023-Q99598	0.031464	6	66.105000	89.537667	77.959448	263	121	8	11	142	67	26	55	0	403	290
P39023-Q9BW30	0.031446	4	82.385000	89.938164	81.043523	269	115	9	10	56	85	31	4	0	403	176
P39023-Q9BYD2	0.033163	22	64.430000	89.427221	76.211910	269	112	10	12	87	113	17	50	0	403	267
P39023-Q9H334	0.072040	116	62.954828	86.750670	52.898272	205	164	26	8	60	155	61	401	0	403	677
P39023-Q9NVR2	0.038353	38	66.503158	88.145360	77.685310	234	148	7	14	213	350	39	108	2	403	710
P39023-Q9P032	0.031981	11	69.466364	90.224069	70.466057	287	97	9	10	21	89	30	35	0	403	175
P39023-Q9P086	0.031322	0	0.000000	90.382531	84.206923	285	99	11	8	54	48	14	1	0	403	117
P39023-Q9UQK1	0.236843	145	72.279379	89.146228	56.153028	247	137	12	7	37	76	34	170	0	403	317
P39023-Q9Y3B9	0.034345	34	60.950000	89.310149	55.828759	251	137	7	8	1	97	55	129	0	403	282
P40429-O00182	0.134777	57	82.122281	90.631527	78.543211	159	27	16	1	174	98	8	75	0	203	355
P40429-O43257	0.031883	16	58.252500	89.903103	67.283896	154	32	15	2	13	66	36	39	0	203	154
P40429-O43402	0.031322	0	0.000000	90.624187	84.710714	154	34	14	1	114	73	9	14	0	203	210
P40429-O43639	0.059088	58	70.555862	88.730690	73.560079	137	47	16	3	109	160	20	91	0	203	380
P40429-O60216	0.042664	52	65.116538	89.307291	56.365626	152	32	18	1	54	134	113	330	0	203	631
P40429-O60826	0.031408	3	93.670000	89.891478	72.509713	153	35	14	1	158	229	121	119	0	203	627
P40429-O75461	0.031627	10	61.804000	90.636502	63.790214	155	33	14	1	16	139	22	104	0	203	281
P40429-P02545	0.031334	3	43.440000	89.369803	73.650105	149	37	15	2	234	207	37	186	0	203	664
P40429-P30405	0.031322	0	0.000000	89.950936	81.576570	154	32	16	1	130	34	4	39	0	203	207
P40429-P35544	0.177813	46	90.221087	90.225665	88.987027	154	33	15	1	45	26	2	1	0	203	74
P40429-P49711	0.189740	143	70.240769	86.751478	56.635791	125	56	15	7	0	291	72	364	0	203	727
P40429-P55263	0.346514	63	91.992857	88.771823	91.659696	131	57	13	2	300	43	2	17	0	203	362
P40429-P61026	0.044516	25	81.450800	88.225123	80.369350	142	41	17	3	97	61	16	26	0	203	200
P40429-Q02080	0.034010	16	76.171250	90.604433	54.725973	158	29	15	1	61	28	37	239	0	203	365
P40429-Q13177	0.056650	71	66.496761	87.648424	70.894084	120	65	16	2	196	139	18	171	0	203	524
P40429-Q15287	0.031476	8	58.143750	90.405517	57.369148	160	28	13	2	52	30	57	166	0	203	305
P40429-Q16576	0.059297	39	78.266923	87.742512	89.092753	121	65	16	1	327	55	8	35	0	203	425
P40429-Q4KMQ1	0.221131	142	71.876761	90.501034	45.236245	156	32	14	1	0	67	105	539	0	203	711
P40429-Q53H80	0.031850	18	55.205000	91.959113	54.924039	163	28	11	1	15	53	20	115	0	203	203
P40429-Q68CZ1	0.068918	120	61.948667	85.834828	66.930221	102	79	15	7	178	594	125	418	0	203	1315
P40429-Q71UM5	0.054481	22	90.749545	90.791724	87.236190	158	32	12	1	41	39	3	1	0	203	84
P40429-Q86YP4	0.149939	79	77.167089	89.648325	50.408894	154	32	16	1	23	111	87	412	0	203	633
P40429-Q8WW35	0.031322	0	0.000000	89.917143	78.282324	154	34	14	1	50	62	5	25	0	203	142
P40429-Q8WXW3	0.031322	0	0.000000	88.402660	73.259604	143	40	19	1	6	538	102	111	0	203	757
P40429-Q92993	0.042298	66	61.158333	87.524729	70.494542	137	47	16	3	181	159	18	155	0	203	513
P40429-Q96L21	0.031402	3	91.893333	89.852562	86.519065	149	38	15	1	125	64	24	1	0	203	214
P40429-Q9Y2Q9	0.031342	2	87.310000	91.591034	68.934118	161	30	11	1	48	63	16	60	0	203	187
P40429-Q9Y2R9	0.031379	6	50.640000	90.657241	83.201653	156	31	15	1	134	69	7	32	0	203	242
P40429-Q9Y333	0.031322	0	0.000000	91.230000	87.262842	156	34	12	1	39	55	1	0	0	203	95
P40429-Q9Y4Z0	0.031458	6	65.306667	90.479557	72.148273	155	32	15	1	49	34	13	43	0	203	139
P40429-Q9Y623	0.045270	44	69.758409	79.711084	69.879366	61	93	42	7	136	706	1011	86	0	203	1939
P40818-Q96ST8	0.288814	237	67.730084	67.082290	61.830613	272	387	93	366	0	411	80	292	0	1118	783
P40939-P25963	0.110951	112	68.343661	90.398427	75.769054	599	118	11	35	164	60	16	77	0	763	317
P41252-P49336	0.393023	273	69.440440	84.576292	69.197220	533	581	119	29	114	172	51	127	5	1262	464
P41252-Q9BTC8	0.449682	295	70.307864	84.787044	65.605640	564	540	130	28	36	284	119	155	3	1262	594
P41252-Q9BV36	0.591379	458	70.270852	85.408978	43.627433	632	471	124	35	3	95	83	419	0	1262	600
P41252-Q9NTK5	0.328353	96	82.775104	84.871442	84.782399	554	558	120	30	179	177	20	20	0	1262	396
P41743-P36959	0.167849	116	72.077500	73.697802	91.270899	160	243	82	111	253	79	11	2	0	596	345
P42025-O75496	0.032737	23	60.847391	91.664468	53.592344	302	55	15	4	26	39	16	128	0	376	209
P42025-P18621	0.107622	31	93.464194	91.905745	86.170761	310	49	13	4	117	43	14	10	0	376	184
P42025-P30405	0.267284	85	82.404000	91.483564	81.705024	298	60	13	5	147	17	1	42	0	376	207
P42025-P62314	0.063843	29	86.636897	92.588484	76.343109	320	39	11	6	51	28	13	27	0	376	119
P42025-Q8WXI9	0.153859	116	71.193103	91.004787	46.490607	295	60	17	4	0	88	124	381	0	376	593
P42025-Q92901	0.033049	15	72.788667	89.083910	86.099926	251	103	17	5	215	146	30	16	0	376	407
P42025-Q99798	0.255775	61	88.481639	88.292181	91.368974	232	120	15	9	619	126	8	27	0	376	780
P42025-Q9Y244	0.031322	0	0.000000	91.428138	68.640284	295	65	13	3	22	49	47	23	0	376	141
P42229-P01889	0.401046	158	77.226772	80.440705	76.936160	382	262	47	103	133	135	31	63	0	794	362
P42685-Q9Y6G9	0.090242	101	67.577723	72.894515	53.393805	70	252	125	58	0	125	172	226	0	505	523
P42766-P11766	0.031322	0	0.000000	86.471463	95.837620	45	73	5	0	356	16	2	0	0	123	374
P42766-P34925	0.037381	39	64.729487	85.395528	66.832438	33	87	3	0	172	121	138	176	0	123	607
P42766-P57060	0.031343	2	90.020000	90.753171	80.838652	88	32	3	0	153	93	36	37	0	123	319
P42766-P62891	0.031322	0	0.000000	91.553171	87.832353	95	27	1	0	27	22	1	1	0	123	51
P42766-Q9Y2R9	0.031730	6	84.503333	89.757398	84.386612	76	45	2	0	139	66	8	29	0	123	242
P43355-Q15843	0.056739	45	74.493333	70.169126	84.141975	102	84	32	91	32	40	4	5	0	309	81
P43358-P60568	0.091250	70	73.547857	70.174511	70.536275	121	66	26	104	9	85	33	26	0	317	153
P43363-Q96FH0	0.074507	70	70.906857	68.774607	83.461933	141	74	24	130	56	45	10	8	0	369	119
P43363-Q9NZE8	0.355638	162	75.240556	68.425908	62.536223	121	97	23	128	19	69	27	73	0	369	188
P43631-O43660	0.583956	165	83.932000	70.554507	74.646829	47	140	47	70	265	79	42	128	0	304	514
P43631-P05141	0.243918	180	69.563778	70.062072	85.376678	74	103	47	80	116	166	16	0	0	304	298
P43631-P46778	0.073245	63	72.468254	74.064342	86.860500	108	98	31	67	65	88	6	1	0	304	160
P43686-O60885	0.087871	148	62.126351	79.314043	50.276211	128	202	48	40	154	228	84	896	0	418	1362
P43686-P09960	0.228074	66	85.395909	75.221435	94.595908	31	285	42	60	559	50	1	1	0	418	611
P43686-P27635	0.031360	4	56.895000	77.361100	81.821121	38	296	45	39	76	97	40	1	0	418	214
P43686-P32969	0.032658	12	76.042500	76.457081	83.446042	22	310	47	39	29	154	7	2	0	418	192
P43686-P46776	0.031322	0	0.000000	78.968756	70.659324	78	262	43	35	22	62	34	30	0	418	148
P43686-Q13573	0.061669	60	70.690667	79.484211	59.692948	79	262	41	36	0	146	235	155	0	418	536
P43686-Q8NHZ8	0.031483	8	58.847500	79.294474	53.226118	81	258	45	34	0	21	26	38	0	418	85
P43686-Q92522	0.031454	14	43.995714	78.668445	54.517793	56	282	52	28	0	70	13	130	0	418	213
P43686-Q9H307	0.044161	44	69.049773	80.118325	51.240893	111	228	45	34	5	181	66	465	0	418	717
P46087-Q6UB35	0.174718	179	66.424804	58.928608	83.716462	225	137	34	416	488	364	39	87	0	812	978
P46087-Q96CJ1	0.055490	65	67.533846	62.982599	58.979923	264	106	45	397	0	119	28	113	0	812	260
P46379-Q9Y586	0.169869	155	68.050194	54.590945	89.536156	112	328	81	611	247	92	19	1	4	1132	359
P46776-O95229	0.031411	4	75.137500	79.622703	73.807112	45	62	41	0	99	83	36	59	0	148	277
P46776-O95861	0.056025	34	80.148529	72.270811	94.375260	40	45	36	27	270	32	4	2	0	148	308
P46776-P08621	0.039079	56	60.879643	73.468041	69.664211	39	48	39	22	57	208	64	108	0	148	437
P46776-P09104	0.031322	0	0.000000	74.291014	95.279839	43	48	35	22	395	34	5	0	0	148	434
P46776-P23246	0.038009	49	61.744898	71.505405	62.108034	34	42	45	27	101	168	129	309	0	148	707
P46776-P35268	0.032196	8	84.410000	79.299527	81.393203	51	50	45	2	67	31	17	13	0	148	128
P46776-P38117	0.031322	0	0.000000	72.274122	94.747098	38	46	37	27	228	25	2	0	0	148	255
P46776-P81877	0.033579	21	67.543333	77.890541	50.491856	36	69	43	0	37	46	10	268	0	148	361
P46776-Q12798	0.031340	2	83.600000	74.669324	80.328023	45	49	33	21	24	122	8	18	0	148	172
P46776-Q13685	0.048115	49	69.377755	68.510203	83.490346	28	45	39	36	322	14	7	91	0	148	434
P46776-Q14CS0	0.031336	2	74.905000	78.270608	70.228097	47	59	39	3	31	150	90	60	0	148	331
P46776-Q15050	0.034451	28	64.832857	78.510473	73.631315	49	47	52	0	44	206	63	52	0	148	365
P46776-Q4U2R6	0.040056	41	67.017561	80.545135	64.119844	52	55	41	0	22	26	43	37	0	148	128
P46776-Q5VUJ6	0.041478	68	60.132353	69.515405	61.460366	28	49	35	36	99	258	65	343	0	148	765
P46776-Q6NYC1	0.031797	14	59.188571	74.113986	85.127692	38	54	34	22	302	37	3	61	0	148	403
P46776-Q8IX12	0.031897	19	55.114737	73.842568	66.541139	31	52	56	9	252	373	121	404	0	148	1150
P46776-Q8N766	0.032061	16	61.381250	74.146689	83.162719	42	41	48	17	396	459	93	45	0	148	993
P46776-Q8WXB1	0.046297	38	73.203158	71.598514	88.967110	41	40	34	33	171	24	7	16	0	148	218
P46776-Q8WYJ6	0.031329	2	50.945000	72.156419	78.684382	34	50	41	23	81	212	38	41	0	148	372
P46776-Q96MY1	0.031351	4	50.992500	78.553041	55.609518	50	57	39	2	89	41	40	266	0	148	436
P46776-Q9NYB9	0.032156	29	51.680000	72.744730	60.455224	36	49	38	25	155	35	56	267	2	148	513
P46776-Q9P086	0.031552	7	68.607143	79.716284	86.089231	50	61	37	0	70	33	12	2	0	148	117
P46776-Q9Y275	0.031322	0	0.000000	77.385068	74.807649	49	49	46	4	143	40	19	83	0	148	285
P46776-Q9Y6G3	0.031322	0	0.000000	82.870203	56.141268	63	50	35	0	0	38	61	43	0	148	142
P46777-O00541	0.031362	4	57.632500	87.448923	74.921224	143	137	15	2	154	268	60	106	0	297	588
P46777-O43264	0.031351	3	64.413333	86.042828	75.200693	124	149	21	3	101	458	138	82	0	297	779
P46777-P07237	0.032263	19	60.400000	86.997138	83.872756	191	75	25	6	261	186	15	46	0	297	508
P46777-P09661	0.032722	10	82.715000	89.163165	83.378706	203	77	14	3	157	54	7	37	0	297	255
P46777-P15311	0.037041	31	68.519677	85.744949	83.080307	160	104	28	5	263	236	33	54	0	297	586
P46777-P16930	0.031322	0	0.000000	85.824007	96.424248	175	76	43	3	399	20	0	0	0	297	419
P46777-P25445	0.032233	21	58.082381	91.154680	70.963463	216	76	4	1	50	157	49	79	0	297	335
P46777-P31150	0.039930	41	66.892439	85.339832	89.856823	176	79	27	15	318	111	7	11	0	297	447
P46777-P42704	0.040324	62	60.537742	80.139394	76.468938	80	160	29	28	7	1153	112	122	0	297	1394
P46777-P54253	0.057621	92	62.960761	89.191347	45.636037	191	96	8	2	72	87	16	640	0	297	815
P46777-P55072	0.033230	16	72.240000	83.936364	79.891141	119	132	39	7	143	538	72	53	0	297	806
P46777-P68104	0.037731	29	70.959655	85.000640	85.201190	144	109	40	4	157	284	18	3	0	297	462
P46777-Q13263	0.062963	132	59.560076	84.346599	62.836551	128	122	44	3	85	343	48	359	0	297	835
P46777-Q13503	0.031322	0	0.000000	90.458889	80.487222	206	86	4	1	62	46	29	7	0	297	144
P46777-Q13547	0.048426	55	67.527091	83.711044	82.080643	113	141	37	6	342	24	19	97	0	297	482
P46777-Q14152	0.046233	141	53.780213	81.158148	63.008408	75	175	32	15	154	525	244	459	5	297	1382
P46777-Q6PKG0	0.082437	147	61.514694	87.016431	51.187801	162	112	20	3	91	204	64	737	0	297	1096
P46777-Q6STE5	0.052511	62	67.261129	87.194209	73.189193	164	101	29	3	127	213	34	109	0	297	483
P46777-Q6UX04	0.037120	51	59.954314	86.734040	69.680064	166	105	20	6	49	235	79	109	4	297	472
P46777-Q8WXI9	0.237545	175	69.677257	87.345791	51.569089	156	124	14	3	3	147	90	353	0	297	593
P46777-Q92925	0.039529	64	59.360469	87.251684	70.093804	141	137	16	3	111	225	35	160	0	297	531
P46777-Q92993	0.038815	95	53.570632	85.824007	69.964815	135	129	30	3	167	172	20	154	0	297	513
P46777-Q96EB6	0.049310	132	55.756061	86.123636	60.672142	159	104	28	6	183	170	26	368	0	297	747
P46777-Q96EL2	0.032176	16	63.041250	89.971987	68.810000	203	87	4	3	34	58	28	47	0	297	167
P46777-Q9BTT4	0.035235	13	87.006154	89.743367	87.137037	191	100	5	1	68	59	7	1	0	297	135
P46777-Q9H6D7	0.031322	0	0.000000	88.529832	79.992810	168	115	13	1	82	213	51	17	0	297	363
P46777-Q9H8H2	0.048362	82	61.379390	84.845320	65.274853	126	140	21	10	199	272	39	341	0	297	851
P46777-Q9NP92	0.034042	32	61.046875	87.531616	82.601686	169	107	18	3	239	125	23	52	0	297	439
P46777-Q9NYK5	0.040027	24	78.277083	87.101111	82.060385	164	107	23	3	179	106	10	43	0	297	338
P46777-Q9UHA3	0.033445	23	64.961739	88.920269	80.373681	188	95	11	3	38	88	37	0	0	297	163
P46777-Q9UJX6	0.038943	44	64.609545	85.627609	76.972749	129	141	23	4	44	583	125	70	0	297	822
P46777-Q9ULQ0	0.107762	111	68.163874	85.572424	75.484916	134	136	21	6	285	314	75	160	6	297	834
P46777-Q9Y230	0.032130	13	67.456923	83.919428	79.054730	83	184	26	4	68	313	39	43	0	297	463
P46777-Q9Y5K5	0.032382	15	67.065333	88.852727	84.960729	193	89	12	3	170	120	22	17	0	297	329
P46777-Q9Y5K8	0.034264	13	83.459231	86.611785	83.058785	106	178	12	1	113	95	28	11	0	297	247
P46778-O00443	0.044331	70	61.603857	78.801562	70.446157	30	96	26	8	428	679	124	455	0	160	1686
P46778-O43660	0.033267	21	65.985714	83.952500	75.390097	51	94	13	2	279	73	40	122	0	160	514
P46778-O75586	0.031437	4	80.690000	89.035562	72.822683	93	62	5	0	77	83	15	71	0	160	246
P46778-O75874	0.031344	2	91.035000	83.039063	94.812729	51	91	13	5	380	32	2	0	0	160	414
P46778-O95931	0.058581	72	66.846250	88.953563	53.647530	107	43	9	1	16	46	41	148	0	160	251
P46778-P28066	0.071012	41	80.353902	86.430313	89.992490	67	87	6	0	174	49	17	1	0	160	241
P46778-P31946	0.034972	16	79.688750	86.992062	89.516911	73	80	7	0	187	42	7	10	0	160	246
P46778-P33316	0.031663	7	74.917143	87.491312	66.162976	75	80	5	0	66	64	23	99	0	160	252
P46778-P37837	0.031322	0	0.000000	84.207937	93.653858	51	94	13	2	300	22	6	9	0	160	337
P46778-P49720	0.032404	11	76.013636	85.472750	93.258780	60	89	10	1	175	28	2	0	0	160	205
P46778-P57735	0.068670	35	83.355143	86.803938	81.032535	69	83	8	0	110	61	14	28	0	160	213
P46778-P62136	0.039585	21	81.159524	84.049375	88.651970	55	89	12	4	268	19	10	33	0	160	330
P46778-Q13247	0.032789	24	60.393333	87.292687	60.642907	73	82	5	0	8	135	26	175	0	160	344
P46778-Q13509	0.083405	38	84.569211	81.443125	87.151089	39	101	16	4	236	186	12	16	0	160	450
P46778-Q14160	0.092727	163	61.509509	76.539375	61.450399	29	89	30	12	395	370	121	744	0	160	1630
P46778-Q5SSJ5	0.034767	29	65.068276	89.034937	61.319892	95	60	5	0	51	177	51	274	0	160	553
P46778-Q8N668	0.031338	2	78.815000	88.991937	78.433684	89	68	3	0	6	142	38	4	0	160	190
P46778-Q96PQ1	0.034401	39	58.828718	83.244250	74.388790	61	81	10	8	193	215	54	133	0	160	595
P46778-Q96RN5	0.033273	22	65.024091	88.921750	59.846307	97	60	3	0	69	265	87	367	0	160	788
P46778-Q99623	0.031322	0	0.000000	84.829312	87.053645	59	85	13	3	170	89	39	1	0	160	299
P46778-Q99719	0.031322	0	0.000000	85.727062	76.705664	66	84	8	2	30	252	47	40	0	160	369
P46778-Q9H845	0.122766	39	89.387949	84.566500	90.112866	53	92	11	4	500	63	24	34	0	160	621
P46778-Q9P015	0.031322	0	0.000000	87.847313	86.478345	83	71	5	1	193	60	37	6	0	160	296
P46778-Q9UJX4	0.031398	6	55.421667	82.439875	79.722490	46	93	17	4	245	375	49	86	0	160	755
P46778-Q9UKA8	0.031938	9	74.832222	90.322438	68.520581	99	59	2	0	43	79	59	60	0	160	241
P46778-Q9UL33	0.031322	0	0.000000	89.851937	86.099143	94	64	2	0	68	60	10	2	0	160	140
P46778-Q9Y2Q9	0.031465	8	57.071250	90.724375	69.030802	109	50	1	0	55	55	11	66	0	160	187
P46779-Q8WUE5	0.075846	48	78.084792	87.843431	70.975265	81	47	9	0	63	108	30	63	0	137	264
P46781-P05387	0.031331	2	57.865000	84.392526	59.497652	79	94	10	11	0	50	23	42	0	194	115
P46781-P09001	0.135811	81	75.639753	86.174330	76.862356	129	44	5	16	127	135	30	56	0	194	348
P46781-P35544	0.031966	15	61.238667	85.963969	84.866757	119	55	10	10	14	56	3	1	0	194	74
P46781-P46781	0.031772	10	67.112000	83.678351	83.637268	82	90	6	16	86	85	5	18	0	194	194
P46781-P52209	0.037446	27	72.056296	84.539124	94.542236	121	49	4	20	431	45	5	2	0	194	483
P46781-P62136	0.186000	76	80.268026	81.640258	87.660939	58	110	6	20	254	33	11	32	0	194	330
P46781-P62714	0.063954	58	71.875345	80.934124	91.520356	45	123	6	20	260	32	4	13	0	194	309
P46781-Q12756	0.178114	128	71.208672	81.020103	68.945858	73	92	8	21	259	730	300	401	5	194	1690
P46781-Q5H9R7	0.133988	153	65.946536	79.765412	62.931386	56	100	13	25	223	227	36	387	0	194	873
P46781-Q8N488	0.190115	63	84.161111	88.097577	53.895263	138	37	13	6	0	49	48	131	0	194	228
P46781-Q9UNX3	0.031322	0	0.000000	86.898557	87.807931	132	42	10	10	94	39	12	0	0	194	145
P46782-O14579	0.040164	18	86.241111	83.879951	82.437403	98	75	20	11	72	211	9	16	0	204	308
P46782-P17174	0.031322	0	0.000000	85.977696	95.006659	115	64	13	12	377	34	2	0	0	204	413
P46782-P53680	0.102418	35	89.569143	83.587892	89.859930	78	105	14	7	82	59	1	0	0	204	142
P46782-P61513	0.031912	8	78.418750	85.404755	85.333152	103	86	14	1	30	55	5	2	0	204	92
P46782-Q15436	0.042628	21	84.476190	87.093676	88.521098	121	67	4	12	498	208	35	24	0	204	765
P46782-Q8N490	0.034440	28	64.797143	86.329853	81.648182	110	73	16	5	257	37	9	82	0	204	385
P46782-Q99836	0.041753	33	72.813030	85.924608	78.374662	113	72	9	10	13	229	28	26	0	204	296
P46782-Q9H0U6	0.032637	13	73.476154	88.206961	75.185500	118	71	12	3	77	41	26	36	0	204	180
P46782-Q9Y3U8	0.209313	56	87.805714	84.823284	81.110000	92	96	14	2	5	79	20	1	0	204	105
P46926-O43521	0.127014	56	81.766964	91.821834	45.189545	238	31	2	18	0	6	52	140	0	289	198
P46937-Q99615	0.598840	289	76.346990	49.188492	88.306093	5	90	94	315	356	74	38	26	0	504	494
P47755-P13929	0.034295	13	83.588462	83.703601	95.748456	160	76	20	30	403	28	3	0	0	286	434
P47755-Q6ZN66	0.104498	99	69.523636	85.598776	83.970537	158	85	34	9	275	290	33	35	0	286	633
P47755-Q8IY57	0.066762	66	70.316212	90.635490	54.770389	209	64	11	2	5	50	20	105	0	286	180
P47897-Q9P2Y4	0.270712	254	66.238071	85.274632	48.846357	366	337	31	41	0	202	67	453	0	775	722
P48444-Q8NHZ8	0.031322	0	0.000000	83.129256	57.810824	319	91	28	73	0	32	17	36	0	511	85
P48556-P13804	0.119940	68	77.339706	68.630886	87.527357	22	209	29	90	198	113	9	13	0	350	333
P48556-P33908	0.119673	136	66.405221	66.482486	81.308009	3	224	25	98	412	99	33	109	0	350	653
P48556-Q9H0F6	0.058251	68	67.656471	66.645829	67.586305	2	217	35	96	31	197	44	115	0	350	387
P48556-Q9HCE1	0.038710	60	59.472167	69.418657	78.749860	37	196	24	93	326	467	94	116	0	350	1003
P48643-P05141	0.060954	62	69.937581	86.205305	81.489094	240	259	28	14	63	193	30	12	0	541	298
P48643-Q9NQ29	0.031341	2	85.315000	85.444159	66.777305	182	320	33	6	14	207	36	114	0	541	371
P49207-P30050	0.031322	0	0.000000	81.150256	69.815758	22	86	9	0	0	93	63	9	0	117	165
P49207-Q13422	0.049002	55	67.796182	80.399145	54.016089	27	70	20	0	0	148	98	273	0	117	519
P49207-Q7RTV5	0.031322	0	0.000000	87.170342	78.187389	41	74	2	0	75	100	22	29	0	117	226
P49368-O43257	0.031580	7	70.447143	86.096752	60.565519	276	219	27	23	4	46	56	48	0	545	154
P49368-P09104	0.304641	75	86.482133	87.182954	93.986382	343	148	28	26	377	50	7	0	0	545	434
P49368-P09769	0.039383	56	61.186786	87.121982	73.442892	344	146	28	27	141	239	43	106	0	545	529
P49368-P63173	0.031972	7	85.382857	86.470771	87.327143	293	203	27	22	20	49	1	0	0	545	70
P49368-Q10567	0.304752	261	67.104904	83.437615	74.464910	188	299	31	27	56	700	54	139	4	545	949
P49368-Q96DI7	0.095802	62	76.328387	85.374624	84.235658	271	219	29	26	247	59	4	47	0	545	357
P49368-Q9NRD0	0.035361	29	66.574828	85.633394	73.420345	273	219	27	26	22	217	14	66	0	545	319
P49407-Q9Y4P8	0.145872	91	74.453736	78.978541	73.134714	183	131	46	58	198	104	19	133	0	418	454
P49721-P62913	0.031338	2	79.595000	91.016269	85.016348	151	46	2	2	60	108	2	8	0	201	178
P49721-Q15024	0.036115	15	84.800000	89.647662	82.845739	133	63	3	2	69	188	31	3	0	201	291
P49721-Q92769	0.057624	22	92.104545	91.613333	82.931639	150	47	2	2	343	24	41	80	0	201	488
P49721-Q99848	0.031322	0	0.000000	91.502836	68.315915	154	43	2	2	24	142	73	67	0	201	306
P49736-Q7Z4G1	0.031322	0	0.000000	73.155619	67.456000	69	574	117	144	0	55	7	23	0	904	85
P49736-Q9NPG3	0.128353	351	56.247066	73.822179	43.415476	126	530	92	156	12	182	115	825	0	904	1134
P49770-P61513	0.031569	7	69.710000	87.669487	86.417500	220	90	29	12	41	44	5	2	0	351	92
P50750-P11142	0.120687	119	68.347395	81.545726	82.727059	209	83	32	48	263	296	50	37	0	372	646
P50750-P47756	0.077079	135	61.812889	81.485887	75.378592	217	69	35	51	59	121	75	22	0	372	277
P50914-Q16254	0.033397	15	74.948000	72.789628	60.274068	91	46	7	71	33	129	92	159	0	215	413
P50914-Q96GS4	0.041783	48	65.789167	74.013628	59.168739	124	13	8	70	94	30	31	202	0	215	357
P50990-Q06546	0.064995	110	62.311091	85.651807	61.333216	236	261	31	20	18	229	34	173	0	548	454
P50990-Q9NXR8	0.056532	89	63.115056	85.503577	54.522129	221	272	41	14	22	153	16	227	0	548	418
P50991-P22102	0.044875	30	77.340000	86.147644	89.731881	303	188	17	31	715	255	18	22	0	539	1010
P50991-P30049	0.034943	25	68.562400	88.014397	78.219583	337	169	11	22	46	87	8	27	0	539	168
P50991-P52815	0.031331	2	58.020000	87.448998	58.715707	316	187	15	21	0	98	13	87	0	539	198
P50991-Q15678	0.101327	174	61.620575	86.202616	59.298602	300	190	22	27	307	257	26	597	0	539	1187
P50991-Q9BZE4	0.038165	23	76.875217	84.950445	73.081262	210	279	25	25	105	301	144	84	0	539	634
P51398-P46779	0.032066	10	74.015000	83.111407	87.691241	192	158	4	44	87	38	11	1	0	398	137
P51398-Q96L21	0.032443	21	60.240000	81.809975	84.547991	157	193	4	44	110	73	29	2	0	398	214
P51398-Q9UKN8	0.032891	39	52.974359	82.810151	76.935134	203	141	10	44	283	343	70	126	0	398	822
P51531-P09661	0.064275	81	66.486543	62.171214	78.429176	117	608	292	573	96	109	10	40	0	1590	255
P51532-P49336	0.058087	293	50.222867	60.908288	67.396616	167	592	219	669	82	186	61	135	18	1647	464
P51665-P78364	0.157219	169	66.173905	84.050247	42.569034	114	182	25	3	40	71	121	772	0	324	1004
P51665-Q6NVY1	0.037111	34	66.834118	78.080370	90.564845	37	205	73	9	326	24	7	29	0	324	386
P51665-Q7L2Z9	0.031466	8	57.208750	78.841728	55.009030	35	219	66	4	4	70	74	120	0	324	268
P51665-Q8N9F7	0.031375	4	63.752500	82.015494	88.593280	77	206	37	4	218	67	23	6	0	324	314
P51665-Q9BTT4	0.031432	5	68.764000	79.856790	81.823852	53	201	66	4	17	103	11	4	0	324	135
P51665-Q9UJ68	0.033272	14	76.155714	79.747160	83.924255	40	216	62	6	169	28	8	30	0	324	235
P51784-Q96RT8	0.186182	145	69.858483	73.947207	69.693203	275	412	78	198	124	525	120	255	0	963	1024
P52907-Q08211	0.037521	58	58.583621	80.426783	76.856984	98	133	20	35	431	541	88	210	0	286	1270
P53621-P18621	0.033234	10	87.014000	81.034559	83.240380	425	606	74	119	83	72	14	15	0	1224	184
P54136-P25705	0.077020	71	71.120845	88.153621	83.345443	382	241	29	8	277	200	16	60	0	660	553
P54750-O15446	0.038950	21	80.317143	81.054131	45.060510	302	91	68	74	0	85	50	375	0	535	510
P55036-O75528	0.038937	26	75.035385	72.771698	64.966458	89	169	40	79	31	177	98	126	0	377	432
P55036-P25786	0.031322	0	0.000000	67.564562	85.643004	15	202	69	91	158	73	8	24	0	377	263
P55036-P54105	0.031410	4	74.725000	72.267480	64.614852	88	152	56	81	0	104	64	69	0	377	237
P55036-Q00610	0.103870	123	66.324228	62.182149	78.722376	0	170	98	109	60	1444	121	50	0	377	1675
P55036-Q08211	0.041853	66	60.839848	65.350504	74.692150	40	151	72	114	235	706	114	215	0	377	1270
P55036-Q92844	0.032276	26	54.723846	73.251432	49.304188	104	148	47	78	45	63	26	291	0	377	425
P55209-Q9P2T1	0.210379	103	76.315728	72.346394	93.065977	122	115	67	87	286	53	6	3	0	391	348
P55884-P02689	0.031498	5	77.698000	71.370369	88.039773	96	460	91	167	61	69	2	0	0	814	132
P55884-P18754	0.033336	55	50.410182	68.130786	83.890570	1	528	107	178	193	174	23	31	0	814	421
P55884-P35637	0.485804	218	75.534541	72.063157	45.417091	95	453	101	165	13	100	14	399	0	814	526
P55884-Q14974	0.683451	559	73.760680	66.965369	84.125365	6	511	92	205	178	645	53	0	73	814	876
P55884-Q68CZ6	0.041065	53	63.570755	71.291167	71.653549	151	400	76	187	0	415	123	65	0	814	603
P55884-Q96JP0	0.157218	111	72.080450	68.424570	86.632593	3	526	104	181	279	294	44	0	0	814	617
P56192-O00743	0.403434	134	79.912388	87.584967	91.407803	550	288	16	46	252	40	4	9	0	900	305
P56192-P42696	0.464565	307	70.305798	87.922144	56.412163	551	289	14	46	35	140	25	230	0	900	430
P57740-P46778	0.031446	9	51.994444	76.929081	83.261438	291	414	79	141	39	108	10	3	0	925	160
P57740-Q9P0K9	0.146711	123	69.849187	77.385568	65.416686	366	337	74	148	91	98	18	137	0	925	344
P59998-P21281	0.101385	86	71.375930	82.631905	83.508454	23	128	16	1	228	218	21	44	0	168	511
P59998-Q9H8H2	0.041070	30	74.211667	87.612976	65.324136	82	83	3	0	233	234	42	342	0	168	851
P60228-P13807	0.070913	45	78.366889	75.035124	81.129471	7	312	104	22	417	176	24	120	0	445	737
P60228-P28070	0.031976	11	69.361818	71.126360	81.852197	0	277	153	15	161	51	11	41	0	445	264
P60228-P30153	0.058045	37	78.989189	78.305101	91.822547	38	330	59	18	489	85	7	8	0	445	589
P60228-P46087	0.221927	175	69.003943	75.112966	59.808867	0	336	95	14	198	168	45	401	0	445	812
P60228-P51531	0.239849	254	65.079606	76.335685	61.162491	6	342	79	18	90	647	252	601	0	445	1590
P60228-P62136	0.047321	40	72.768000	77.825101	86.669576	17	346	66	16	249	36	12	33	0	445	330
P60228-Q05519	0.039612	77	56.908312	69.727663	52.566116	0	246	184	15	16	114	57	297	0	445	484
P60228-Q15022	0.031719	18	52.108889	67.819011	56.311651	0	231	188	26	1	269	132	337	0	445	739
P60228-Q8N9F7	0.033420	16	73.326250	76.120966	86.301306	0	357	73	15	139	147	26	2	0	445	314
P60228-Q92506	0.031359	3	70.826667	73.408629	90.950536	0	308	121	16	214	29	9	9	0	445	261
P60228-Q9NX55	0.032978	37	54.222703	64.844742	60.358915	0	162	244	39	0	66	18	45	0	445	129
P60510-P35544	0.187495	56	86.454821	93.901042	90.093108	271	19	13	4	57	12	4	1	0	307	74
P60866-Q5J8M3	0.031322	0	0.000000	83.807899	67.633934	57	43	16	3	0	98	50	35	0	119	183
P60866-Q7L5Y9	0.036950	25	72.939200	80.647647	88.987879	37	61	10	11	248	126	14	8	0	119	396
P60900-O60675	0.035814	13	88.722308	94.025610	75.087756	208	31	5	2	68	33	12	43	0	246	156
P60900-P51825	0.207868	150	70.470800	91.587764	44.133355	187	51	4	4	149	53	53	955	0	246	1210
P60900-Q9BZF9	0.064199	91	64.753736	89.618374	68.495452	168	66	8	4	113	617	468	218	5	246	1416
P61158-P23193	0.102053	67	75.693433	89.368230	76.093721	310	78	9	21	82	151	14	54	0	418	301
P61160-Q8WUA7	0.579710	252	77.303810	91.216650	69.417002	284	94	14	2	248	59	27	183	0	394	517
P61163-P07910	0.450428	144	80.481458	91.852952	59.627843	299	60	13	4	54	67	22	163	0	376	306
P61163-P12277	0.228304	92	79.134783	89.602793	90.477087	259	95	16	6	287	68	18	8	0	376	381
P61163-P61353	0.032822	9	87.676667	91.315319	89.010956	294	64	13	5	80	52	4	0	0	376	136
P61163-Q96GD3	0.215872	142	71.631831	90.323537	66.561197	277	76	17	6	237	151	11	261	0	376	660
P61201-P62993	0.051598	43	73.421628	79.742438	84.980000	35	346	36	26	63	140	8	6	0	443	217
P61247-O43739	0.033050	20	65.805000	79.984924	81.000625	121	90	13	40	121	212	45	22	0	264	400
P61247-P08631	0.078089	93	67.058817	79.001742	77.855323	116	94	6	48	222	179	38	87	0	264	526
P61247-P09417	0.031723	5	93.738000	79.103333	94.027418	105	99	24	36	229	5	6	4	0	264	244
P61247-P09496	0.038881	27	74.104074	81.340265	63.824718	138	73	14	39	14	92	67	75	0	264	248
P61247-P11021	0.057964	33	81.545152	80.210568	84.836667	137	73	10	44	311	274	45	24	0	264	654
P61247-P18621	0.031322	0	0.000000	80.557008	88.484620	126	86	13	39	133	34	12	5	0	264	184
P61247-P22695	0.031386	7	48.364286	79.823674	88.186269	115	92	19	38	358	53	13	29	0	264	453
P61247-P50613	0.090148	36	87.016111	80.227045	85.366647	119	92	15	38	231	55	32	28	0	264	346
P61247-P54855	0.038391	27	73.451111	79.494508	91.101774	118	92	8	46	412	80	27	11	0	264	530
P61247-Q06787	0.055948	66	67.435000	78.772311	65.071804	97	113	12	42	100	248	23	261	0	264	632
P61247-Q09028	0.107347	72	75.017778	79.043258	89.084612	111	98	10	45	313	63	20	29	0	264	425
P61247-Q6ZMV9	0.032091	15	63.310667	79.305227	67.660025	118	92	9	45	111	351	162	190	0	264	814
P61247-Q71UM5	0.031322	0	0.000000	78.539053	84.293214	78	133	16	37	27	49	7	1	0	264	84
P61247-Q86XR5	0.031454	7	59.738571	81.107045	57.764052	122	88	27	27	19	19	39	76	0	264	153
P61247-Q8N2E6	0.043951	35	73.344286	79.104205	72.445992	99	111	14	40	71	81	25	65	0	264	242
P61247-Q9NP66	0.031402	3	91.620000	81.064659	69.873487	136	72	20	36	73	144	26	104	0	264	347
P61247-Q9NZL9	0.100957	45	83.463333	80.100720	89.649551	105	107	17	35	274	25	16	19	0	264	334
P61247-Q9NZZ3	0.035659	22	73.259091	81.284242	67.894201	126	87	19	32	18	83	80	38	0	264	219
P61254-O00425	0.034655	15	80.518000	85.968552	76.348152	83	41	19	2	125	312	49	93	0	145	579
P61254-O95630	0.038838	17	86.139412	87.743448	82.713184	105	25	13	2	240	110	13	61	0	145	424
P61254-P52790	0.043041	23	82.394348	83.602414	87.835991	66	55	16	8	579	272	45	27	0	145	923
P61254-Q5J8M3	0.031322	0	0.000000	89.978759	68.598142	107	35	3	0	5	98	41	39	0	145	183
P61254-Q96L21	0.031322	0	0.000000	89.132483	85.611776	106	33	6	0	127	56	27	4	0	145	214
P61254-Q9HD40	0.031358	7	39.501429	83.234966	90.289840	60	62	13	10	411	49	8	33	0	145	501
P61254-Q9NYK5	0.031343	2	88.680000	86.623034	81.964260	91	39	14	1	172	114	9	43	0	145	338
P61254-Q9UKV8	0.132072	65	79.302923	81.799172	88.231700	52	64	21	8	581	217	24	37	0	145	859
P61289-P17844	0.073766	43	79.937907	80.039724	74.335879	139	53	22	40	290	135	22	167	0	254	614
P61313-O00764	0.031322	0	0.000000	82.135833	93.712340	103	46	52	3	258	47	7	0	0	204	312
P61313-O14492	0.047182	46	70.037391	83.921127	60.495554	123	30	49	2	153	113	45	321	0	204	632
P61313-O60566	0.053178	95	61.180842	82.342892	62.182019	101	52	49	2	127	388	98	437	0	204	1050
P61313-O75528	0.045149	43	70.109767	87.031078	69.671875	125	50	29	0	92	162	53	125	0	204	432
P61313-P28347	0.031322	0	0.000000	85.051912	72.990329	124	33	47	0	161	108	56	101	0	204	426
P61313-P35544	0.062599	29	86.251724	85.056176	88.863108	125	34	44	1	44	26	3	1	0	204	74
P61313-P35754	0.031322	0	0.000000	82.544118	92.726038	121	29	45	9	92	14	0	0	0	204	106
P61313-P41208	0.048342	25	84.018000	84.292794	76.121802	97	61	46	0	3	138	10	21	0	204	172
P61313-P46087	0.061505	89	64.441124	80.369069	61.982475	82	66	52	4	221	156	50	385	0	204	812
P61313-P49642	0.031841	6	88.756667	87.055784	89.226429	116	78	9	1	287	104	21	8	0	204	420
P61313-P61978	0.064305	74	67.889730	80.958775	63.029352	99	51	48	6	54	174	34	201	0	204	463
P61313-P82664	0.031873	12	64.752500	84.560000	71.905970	122	42	37	3	98	21	23	59	0	204	201
P61313-Q13404	0.188523	51	88.579412	82.634363	89.000068	98	56	48	2	109	28	4	6	0	204	147
P61313-Q13547	0.485479	166	79.548675	79.755637	81.670726	65	88	46	5	334	33	13	102	0	204	482
P61313-Q14562	0.035368	23	71.515217	79.363529	71.465262	60	83	60	1	149	645	168	258	0	204	1220
P61313-Q14974	0.440284	148	79.664392	78.183824	91.210422	69	75	38	22	641	217	18	0	0	204	876
P61313-Q16629	0.031724	12	60.745833	83.783578	58.690546	117	37	49	1	18	67	35	118	0	204	238
P61313-Q86VX2	0.049340	27	82.619259	85.238676	84.027750	112	56	36	0	64	114	19	3	0	204	200
P61313-Q9BV35	0.032177	11	72.906364	80.127745	75.436453	91	54	52	7	15	329	88	36	0	204	468
P61313-Q9BZE4	0.031568	9	61.692222	80.240588	75.729590	89	56	50	9	151	296	113	74	0	204	634
P61313-Q9NZI8	0.044276	58	64.422931	80.848333	77.081993	96	50	51	7	117	321	60	79	0	204	577
P61313-Q9UHV9	0.031322	0	0.000000	88.506618	74.484091	129	66	9	0	69	35	12	38	0	204	154
P61313-Q9UNP9	0.308696	68	88.671912	82.141863	81.638870	101	51	49	3	155	85	20	41	0	204	301
P61313-Q9UPN4	0.033252	35	56.437143	86.313137	63.512835	125	61	16	2	94	437	123	429	0	204	1083
P61313-Q9Y223	0.037281	27	71.790741	78.849608	88.944875	89	51	51	13	459	222	21	20	0	204	722
P61313-Q9Y275	0.032701	21	62.400952	87.497304	73.944702	128	51	25	0	137	47	9	92	0	204	285
P61326-Q86Y82	0.071927	58	73.678621	87.203904	76.485616	97	35	9	5	105	89	32	50	0	146	276
P61353-O75461	0.031430	6	61.438333	89.315368	65.107189	91	41	4	0	33	122	23	103	0	136	281
P61353-O94927	0.031340	2	83.065000	86.986397	76.624518	69	58	8	1	83	402	108	40	0	136	633
P61353-P09493	0.031322	0	0.000000	89.501250	88.308204	84	50	1	1	193	61	28	2	0	136	284
P61353-P29375	0.048051	63	65.139683	87.692353	71.275988	66	66	2	2	379	767	107	437	0	136	1690
P61353-P30050	0.031333	2	65.810000	79.788088	64.786788	0	116	19	1	0	47	106	12	0	136	165
P61353-P35232	0.031322	0	0.000000	83.879779	87.594522	28	92	15	1	132	122	18	0	0	136	272
P61353-P35754	0.031322	0	0.000000	89.428235	93.345566	93	39	3	1	98	8	0	0	0	136	106
P61353-P43355	0.046365	40	72.225500	88.188382	68.730227	78	54	3	1	85	102	16	106	2	136	309
P61353-P46527	0.031322	0	0.000000	90.514412	58.016566	100	34	2	0	12	55	33	98	0	136	198
P61353-P61313	0.096156	36	87.960833	88.343750	89.897892	79	54	2	1	132	68	4	0	0	136	204
P61353-P61353	0.074524	28	90.408929	91.313897	91.254338	104	29	3	0	103	31	2	0	0	136	136
P61353-P61960	0.031322	0	0.000000	91.167426	87.507059	104	30	1	1	56	22	4	3	0	136	85
P61353-Q02543	0.031322	0	0.000000	88.557353	89.126989	83	50	2	1	129	36	9	2	0	136	176
P61353-Q12926	0.031779	8	74.557500	88.985441	73.051699	88	44	4	0	128	107	23	101	0	136	359
P61353-Q13895	0.033099	26	60.780769	85.788676	75.428261	49	76	10	1	194	106	37	100	0	136	437
P61353-Q16637	0.031639	6	80.103333	91.193456	60.880782	105	29	2	0	32	74	61	127	0	136	294
P61353-Q6IPR1	0.031322	0	0.000000	89.881838	85.621556	96	38	1	1	48	30	8	4	0	136	90
P61353-Q99766	0.031719	10	65.398000	90.524191	82.492372	104	30	1	1	151	24	3	37	0	136	215
P61353-Q9BX46	0.035154	28	66.772143	89.758824	59.656949	96	36	4	0	62	21	26	127	0	136	236
P61353-Q9HBG6	0.067460	52	74.724038	84.866471	82.522168	33	99	3	1	444	661	35	101	0	136	1241
P61353-Q9NYK5	0.031322	0	0.000000	88.451324	82.747604	85	46	4	1	189	97	10	42	0	136	338
P61353-Q9P086	0.034553	16	78.286875	89.498750	83.502479	91	42	2	1	60	35	16	6	0	136	117
P61353-Q9UM11	0.031322	0	0.000000	85.936029	78.349637	57	68	9	2	283	63	53	97	0	136	496
P61353-Q9Y230	0.063052	48	75.147917	82.902647	78.811102	20	103	11	2	50	328	43	42	0	136	463
P61353-Q9Y5I1	0.031461	8	56.611250	87.187426	72.660495	61	71	4	0	313	320	43	273	0	136	949
P61513-O43521	0.033851	18	72.398333	92.542174	53.972626	79	12	1	0	0	50	39	109	0	92	198
P61513-P30050	0.031322	0	0.000000	79.722826	64.988727	4	77	9	2	0	51	102	12	0	92	165
P61513-P47813	0.031414	5	65.252000	87.206413	70.850069	44	42	4	2	18	63	38	25	0	92	144
P61513-P61254	0.031322	0	0.000000	87.082717	88.141655	47	37	6	2	102	30	13	0	0	92	145
P61513-P78537	0.031767	5	95.792000	89.863043	84.141046	68	18	6	0	90	29	26	8	0	92	153
P61513-Q13435	0.034221	20	71.301000	87.974239	62.386894	60	24	5	3	29	368	166	332	0	92	895
P61513-Q14186	0.031639	6	80.066667	89.041196	65.243976	62	24	4	2	137	78	25	170	0	92	410
P61513-Q14974	0.704762	284	85.539824	73.679022	92.017146	14	45	25	8	667	194	15	0	10	92	876
P61513-Q8TAQ2	0.081283	88	68.389659	86.129674	62.297768	49	35	4	4	325	212	113	564	0	92	1214
P61513-Q8WY41	0.127625	71	77.269437	91.788043	54.467637	74	17	1	0	43	16	71	162	0	92	292
P61513-Q96GQ7	0.044926	47	68.353404	85.421304	70.219774	30	56	4	2	178	290	127	201	0	92	796
P61513-Q9BTT4	0.031404	3	92.446667	89.252174	88.961259	65	20	7	0	84	43	5	3	0	92	135
P61513-Q9UBU9	0.033266	21	65.983810	86.906413	78.230582	43	45	2	2	350	110	31	128	0	92	619
P61513-Q9Y291	0.031940	10	71.452000	89.016522	84.042642	62	25	5	0	26	73	5	2	0	92	106
P61981-P05387	0.288690	92	81.898587	92.370526	61.839739	209	26	6	6	2	58	4	51	0	247	115
P61981-P06028	0.363095	118	80.521102	92.248300	53.355275	207	29	5	6	0	31	5	55	0	247	91
P61981-Q15311	0.317792	148	75.213243	88.338623	63.443557	166	66	8	7	98	244	70	243	0	247	655
P62081-Q9Y333	0.031322	0	0.000000	84.617732	86.025053	82	92	16	4	38	55	2	0	0	194	95
P62136-P19387	0.034366	15	79.452000	88.046273	89.417745	268	19	10	33	197	55	18	5	0	330	275
P62136-P45880	0.115705	48	83.840417	87.597212	87.511429	259	28	10	33	175	100	8	11	0	330	294
P62136-Q92569	0.261609	132	74.739545	86.233515	76.219436	225	61	11	33	110	249	25	77	0	330	461
P62140-P49755	0.132875	54	83.062593	89.901254	81.134566	270	20	14	23	77	100	17	25	0	327	219
P62191-O43143	0.055938	49	72.592245	72.140886	81.958264	9	293	74	64	323	344	54	74	0	440	795
P62191-O60341	0.047535	72	62.867361	73.273500	78.130493	12	298	67	63	468	182	19	183	0	440	852
P62191-O75934	0.031949	11	68.810000	75.837000	77.543467	34	295	55	56	62	95	58	10	0	440	225
P62191-P00568	0.031465	5	73.678000	74.355773	82.637268	9	308	70	53	11	167	16	0	0	440	194
P62191-P08865	0.032459	14	69.663571	72.804795	72.621525	4	311	67	58	69	128	24	74	0	440	295
P62191-P12956	0.053734	56	69.418571	73.328818	74.928916	15	294	71	60	71	386	88	64	0	440	609
P62191-P13929	0.031649	8	69.501250	72.425273	93.318825	9	294	72	65	365	63	6	0	0	440	434
P62191-P29401	0.044175	29	77.609310	71.707432	94.898684	7	292	73	68	580	38	3	2	0	440	623
P62191-P35544	0.031322	0	0.000000	74.572182	82.697973	7	316	70	47	2	68	2	2	0	440	74
P62191-P42025	0.031610	7	72.174286	72.752318	85.316622	4	300	88	48	135	214	22	5	0	440	376
P62191-P43355	0.035223	42	59.680000	75.635182	59.616764	40	279	66	55	0	149	40	120	0	440	309
P62191-P82912	0.031368	3	76.606667	75.943045	69.961237	34	297	53	56	79	34	19	62	0	440	194
P62191-Q02080	0.031680	14	55.833571	75.887386	48.978192	33	290	66	51	35	52	8	270	0	440	365
P62191-Q3V5L5	0.048320	76	62.437632	73.476182	76.123169	42	262	73	63	294	280	59	159	0	440	792
P62191-Q96ES7	0.032237	13	68.987692	73.573091	80.913652	18	292	72	58	57	190	29	17	0	440	293
P62195-P08865	0.031460	7	60.351429	77.162438	72.578034	29	301	51	25	87	108	25	75	0	406	295
P62195-P17661	0.098000	93	69.759355	78.989286	67.412489	44	289	57	16	53	223	51	143	0	406	470
P62195-P28070	0.031427	8	52.541250	80.041724	80.865341	50	289	48	19	148	61	13	42	0	406	264
P62195-P30101	0.034531	15	80.072000	80.283596	84.925030	58	281	45	22	228	230	12	35	0	406	505
P62195-P51858	0.031485	17	43.299412	81.898251	53.274333	98	246	46	16	11	67	13	149	2	406	240
P62195-P63173	0.031322	0	0.000000	81.206305	85.277571	88	254	47	17	10	58	2	0	0	406	70
P62195-Q5SSJ5	0.044138	51	66.442549	81.478054	55.631537	92	251	48	15	0	207	45	301	0	406	553
P62195-Q8N6U8	0.055246	99	61.277677	81.249532	62.895898	80	257	51	18	76	171	68	214	0	406	529
P62195-Q8N960	0.039189	52	62.136154	80.566576	72.342130	78	259	45	24	164	518	101	203	0	406	986
P62241-O43521	0.031378	4	64.920000	87.062212	49.773384	111	77	19	1	0	45	28	125	0	208	198
P62241-P00492	0.031322	0	0.000000	85.029952	88.263394	97	85	22	4	159	35	11	13	0	208	218
P62241-P09661	0.031361	4	57.312500	83.278654	84.854118	95	71	35	7	158	54	11	32	0	208	255
P62241-P23760	0.037823	35	67.334571	84.928462	57.481545	96	83	28	1	67	99	47	266	0	208	479
P62241-P26368	0.033547	26	62.974231	83.168942	73.152547	86	85	33	4	70	253	68	84	0	208	475
P62241-P38159	0.031470	6	66.800000	82.862692	52.753529	83	87	34	4	8	71	53	259	0	208	391
P62241-P61962	0.031495	5	77.438000	83.667019	90.445497	82	95	29	2	260	60	15	7	0	208	342
P62241-Q02878	0.031671	7	75.285714	86.009712	74.605174	93	94	20	1	89	102	55	42	0	208	288
P62241-Q8WTW4	0.031332	2	61.840000	84.738077	72.904579	89	92	26	1	0	257	119	4	0	208	380
P62241-Q96F24	0.031452	6	64.536667	85.499471	68.349024	101	82	24	1	100	38	57	92	0	208	287
P62241-Q9H6T3	0.033325	23	64.370000	83.832885	73.710571	94	77	32	5	254	184	60	167	0	208	665
P62241-Q9NQ29	0.031322	0	0.000000	82.893221	70.687817	70	111	23	4	42	189	57	83	0	208	371
P62241-Q9NYB9	0.031611	10	61.048000	82.593750	60.789064	88	78	38	4	147	40	60	266	0	208	513
P62244-O60832	0.065065	28	87.918214	89.073308	77.254436	84	41	3	2	256	115	39	104	0	130	514
P62244-O75529	0.033568	17	72.521765	89.998231	76.612784	89	37	1	3	199	220	69	101	0	130	589
P62244-P15880	0.206527	74	81.964595	86.806769	76.064778	52	73	4	1	102	104	27	60	0	130	293
P62244-Q13033	0.031545	9	60.307778	89.496923	63.576976	87	37	4	2	246	140	60	351	0	130	797
P62249-P08621	0.047557	33	76.907273	88.938630	67.910389	91	48	3	4	47	207	70	113	0	146	437
P62249-P11766	0.037482	14	90.058571	88.862397	95.737273	101	36	6	3	352	20	2	0	0	146	374
P62249-P36873	0.461215	85	90.486000	88.526164	90.747771	99	40	4	3	273	18	10	22	0	146	323
P62249-P36941	0.103728	96	69.910313	90.711164	64.034483	103	38	2	3	113	82	68	172	0	146	435
P62249-P54709	0.031339	2	81.670000	90.620205	86.399319	101	38	5	2	133	130	13	3	0	146	279
P62249-P62917	0.032083	11	71.359091	89.032671	78.530973	96	44	3	3	120	48	64	25	0	146	257
P62249-Q96GV9	0.047105	66	63.964848	91.766301	38.684369	114	27	4	1	0	0	23	183	0	146	206
P62249-Q9BZJ0	0.031996	32	48.266875	86.799863	74.372429	76	58	9	3	319	284	62	183	0	146	848
P62258-P01116	0.079595	56	75.777321	88.269843	86.676931	178	54	8	15	128	29	27	5	0	255	189
P62258-P31323	0.472493	222	74.803649	85.721255	71.341053	151	71	19	14	114	156	48	100	0	255	418
P62258-P38646	0.165905	108	73.057130	86.141765	83.609234	168	62	6	19	355	231	28	65	0	255	679
P62258-P82650	0.339464	137	77.206350	88.380157	76.896583	193	38	12	12	129	158	9	64	0	255	360
P62263-P11142	0.160110	78	78.119744	79.511060	85.248127	66	46	17	22	334	250	28	34	0	151	646
P62263-P61927	0.033374	18	70.093889	83.630662	72.220928	85	36	25	5	10	42	42	3	0	151	97
P62263-Q96HE7	0.037851	25	74.415200	82.907748	73.508996	74	45	22	10	127	167	98	76	0	151	468
P62263-Q9BUF5	0.308211	81	85.121111	77.476490	88.335090	38	73	22	18	271	146	18	11	0	151	446
P62263-Q9BWW4	0.075146	52	76.367115	85.335828	49.909175	97	26	19	9	7	63	40	278	0	151	388
P62263-Q9P2L0	0.059099	44	75.710000	78.389470	84.134344	63	47	19	22	518	505	82	76	0	151	1181
P62266-O43513	0.031327	2	42.595000	87.348182	71.709528	77	56	9	1	45	100	45	43	0	143	233
P62266-O75679	0.048438	41	72.874878	83.513916	80.613880	50	73	19	1	128	133	15	41	0	143	317
P62266-Q9Y230	0.031427	6	60.961667	82.707762	79.811166	34	91	17	1	80	301	44	38	0	143	463
P62269-O00567	0.031495	19	42.308421	82.461447	72.855774	23	105	22	2	121	310	31	132	0	152	594
P62269-O76003	0.032553	8	89.626250	84.580855	82.292836	95	30	21	6	43	258	14	20	0	152	335
P62269-P01562	0.035192	16	80.361250	85.240592	76.084127	78	52	19	3	41	94	34	20	0	152	189
P62269-Q13291	0.036845	25	72.750400	86.905987	69.911015	106	21	22	3	81	105	62	87	0	152	335
P62269-Q5T686	0.036222	23	73.464348	88.458421	52.527687	113	21	16	2	0	24	41	82	0	152	147
P62269-Q9NYB0	0.034457	19	73.390000	87.161908	69.359123	107	24	19	2	76	158	42	123	0	152	399
P62277-O43257	0.032061	11	70.986364	87.205298	68.982597	86	55	8	2	15	70	38	31	0	151	154
P62277-O43716	0.031983	9	75.850000	87.696026	73.866985	99	39	8	5	10	82	22	22	0	151	136
P62277-O95926	0.031322	0	0.000000	86.539139	81.200700	85	53	8	5	42	163	38	0	0	151	243
P62277-O95983	0.031474	8	57.932500	87.656556	70.872371	101	37	8	5	32	144	62	53	0	151	291
P62277-P14550	0.033869	10	90.977000	86.213444	95.487231	105	30	4	12	292	28	4	1	0	151	325
P62277-P30566	0.031333	2	65.405000	87.041921	94.602810	106	30	3	12	439	33	5	7	0	151	484
P62277-P35544	0.031328	2	47.230000	87.483642	87.680811	99	39	11	2	35	35	3	1	0	151	74
P62277-Q13084	0.031322	0	0.000000	86.810199	90.138750	91	46	9	5	179	64	11	2	0	151	256
P62277-Q15050	0.034282	28	64.301429	86.130993	73.263699	91	46	6	8	37	216	51	61	0	151	365
P62277-Q7Z7F7	0.031878	10	70.020000	88.209934	64.693125	94	48	7	2	2	53	32	41	0	151	128
P62277-Q8N488	0.113677	40	87.746750	88.973179	56.517018	92	53	6	0	1	59	51	117	0	151	228
P62277-Q9NP97	0.031322	0	0.000000	87.563775	90.990938	93	48	7	3	73	21	2	0	0	151	96
P62277-Q9UKJ3	0.087002	127	63.978583	84.860199	43.309361	67	65	15	4	37	148	94	1223	0	151	1502
P62280-O60508	0.031322	0	0.000000	79.666392	77.641088	69	45	25	19	239	165	100	75	0	158	579
P62280-P18754	0.040553	18	86.721111	78.058291	91.788361	61	53	19	25	357	36	8	20	0	158	421
P62280-Q06190	0.041229	47	65.694043	81.363418	53.669478	76	44	25	13	287	85	67	711	0	158	1150
P62280-Q8TDN6	0.031336	2	74.365000	83.901582	81.187819	82	43	29	4	178	86	51	38	0	158	353
P62280-Q96HC4	0.103136	61	77.551475	80.197089	61.652752	75	40	29	14	142	137	14	303	0	158	596
P62280-Q9BZR8	0.046576	40	72.347750	84.934051	57.115963	94	29	34	1	6	126	43	152	0	158	327
P62280-Q9Y512	0.032228	15	65.230667	81.072278	85.280533	71	45	30	12	250	166	15	38	0	158	469
P62310-P08865	0.461205	96	88.073021	78.630294	75.759288	20	61	10	11	131	76	16	72	0	102	295
P62310-P11021	0.247332	63	87.365714	79.933137	86.828700	41	37	12	12	399	184	40	31	0	102	654
P62312-P08865	0.092874	34	88.872647	83.635000	76.516068	32	38	7	3	151	60	12	72	0	80	295
P62312-Q8NEZ2	0.043433	45	68.146444	85.144625	72.746826	48	22	7	3	135	140	9	113	0	80	397
P62312-Q9UMS4	0.031393	3	88.546667	83.747250	87.201944	40	29	6	5	322	132	20	30	0	80	504
P62314-Q99575	0.033418	24	63.960417	76.644538	73.164033	54	26	8	31	351	341	77	255	0	119	1024
P62333-O95619	0.031341	2	85.470000	82.828226	80.503040	45	305	35	4	60	125	24	18	0	389	227
P62333-P28074	0.031322	0	0.000000	83.504113	77.977909	79	275	31	4	143	57	4	59	0	389	263
P62333-P48059	0.032765	11	79.821818	81.715116	77.296369	39	301	42	7	3	271	47	4	0	389	325
P62333-Q12824	0.035449	28	67.482500	83.647995	69.356026	77	276	32	4	29	214	52	90	0	389	385
P62333-Q13573	0.031951	16	59.555625	83.903959	60.742257	75	280	30	4	3	189	190	154	0	389	536
P62333-Q96DX5	0.033417	25	63.147200	82.760540	83.693673	56	292	37	4	165	93	2	34	0	389	294
P62333-Q96SU4	0.047361	72	62.785694	83.892314	71.377269	101	249	35	4	208	274	68	186	0	389	736
P62333-Q9NWK9	0.037774	46	62.465000	84.593650	54.291745	90	270	25	4	4	185	44	237	0	389	470
P62424-O60832	0.031322	0	0.000000	81.272632	76.605214	95	116	33	22	246	128	35	105	0	266	514
P62424-O75781	0.040454	43	66.550000	84.262669	59.371189	138	79	41	8	54	94	54	185	0	266	387
P62424-O95299	0.031518	9	58.492222	83.075376	76.091944	125	93	31	17	66	204	39	46	0	266	355
P62424-P01562	0.032360	12	72.818333	84.462444	74.657937	142	87	22	15	26	103	39	21	0	266	189
P62424-P02774	0.120511	39	89.139744	82.248722	86.056561	115	90	44	17	209	236	6	23	0	266	474
P62424-P22087	0.033053	22	63.795909	82.374098	77.197165	125	80	48	13	199	30	6	86	0	266	321
P62424-P28065	0.031341	3	54.516667	82.382368	85.447397	113	99	40	14	129	62	11	17	0	266	219
P62424-P30085	0.031322	0	0.000000	85.239323	89.758929	144	84	27	11	121	73	2	0	0	266	196
P62424-P35544	0.031322	0	0.000000	84.350564	88.563514	138	80	38	10	39	32	2	1	0	266	74
P62424-P37802	0.031322	0	0.000000	84.208534	83.007337	142	74	35	15	92	72	26	9	0	266	199
P62424-P38606	0.031322	0	0.000000	79.542669	89.400600	82	120	40	24	364	237	12	4	0	266	617
P62424-P40429	0.031322	0	0.000000	84.376955	90.557734	137	85	29	15	152	37	13	1	0	266	203
P62424-P43353	0.031322	0	0.000000	79.873947	94.791731	112	89	33	32	415	43	3	7	0	266	468
P62424-P51398	0.034296	21	70.428095	81.763759	80.413317	107	101	38	20	103	246	4	45	0	266	398
P62424-P52209	0.032374	7	93.218571	81.186692	94.679710	121	81	34	30	433	43	6	1	0	266	483
P62424-P55072	0.034250	23	68.224348	77.673571	79.626588	65	137	36	28	133	543	75	55	0	266	806
P62424-P61978	0.040866	40	68.240000	80.945827	63.348186	86	126	38	16	50	175	38	200	0	266	463
P62424-P63244	0.031339	2	81.385000	82.694398	91.431672	128	77	51	10	250	53	12	2	0	266	317
P62424-P67809	0.036589	43	61.857442	84.080752	55.638241	137	79	45	5	50	42	25	207	0	266	324
P62424-Q05513	0.154962	68	80.286029	78.674023	78.066081	103	98	22	43	203	255	50	84	0	266	592
P62424-Q13084	0.031322	0	0.000000	84.200075	87.556836	140	84	25	17	140	101	13	2	0	266	256
P62424-Q13503	0.031586	7	70.790000	83.480414	81.468958	134	84	29	19	68	41	27	8	0	266	144
P62424-Q13619	0.031993	22	54.079091	80.695639	84.202292	98	112	29	27	340	337	28	54	0	266	759
P62424-Q14687	0.055581	112	59.772143	82.004699	49.357938	115	101	25	25	37	274	91	815	0	266	1217
P62424-Q14997	0.035287	34	63.403235	74.862594	85.125496	78	114	23	51	722	985	83	53	0	266	1843
P62424-Q3SYB3	0.071460	94	65.762340	84.382707	50.417578	138	83	37	8	41	47	37	292	0	266	417
P62424-Q86Y82	0.036281	14	87.429286	84.605789	76.528804	141	76	40	9	90	106	38	42	0	266	276
P62424-Q8WUA4	0.036770	32	67.443125	79.599812	67.795016	99	103	39	25	270	268	78	295	0	266	911
P62424-Q92769	0.050608	46	71.701087	82.391090	83.020840	113	101	39	13	346	21	33	88	0	266	488
P62424-Q96KQ4	0.067472	116	62.114052	80.228083	56.351771	119	85	32	30	130	294	66	600	0	266	1090
P62424-Q96L21	0.031322	0	0.000000	83.203571	86.082243	135	76	43	12	122	63	27	2	0	266	214
P62424-Q99436	0.031350	4	50.822500	82.027782	84.307401	119	88	43	16	161	82	10	24	0	266	277
P62424-Q9H7X7	0.444663	87	89.322989	84.119737	85.865946	129	94	30	13	88	79	18	0	0	266	185
P62424-Q9UK53	0.044337	59	64.190339	81.979812	55.211374	105	100	46	15	27	134	21	240	0	266	422
P62424-Q9UKA8	0.051439	62	66.849355	84.733459	66.840996	144	79	33	10	61	54	58	68	0	266	241
P62424-Q9UKY4	0.044303	21	85.942381	82.008534	85.466893	111	102	30	23	415	250	33	52	0	266	750
P62699-P21926	0.033015	11	81.944545	86.477934	83.363026	74	34	7	6	96	89	39	4	0	121	228
P62701-O14867	0.180882	117	72.709915	90.934563	51.643981	187	69	5	2	101	126	61	448	0	263	736
P62701-P23246	0.036880	38	64.433158	91.393042	59.272150	197	60	3	3	45	221	102	339	0	263	707
P62701-P35754	0.031322	0	0.000000	90.921445	93.200094	184	74	3	2	97	9	0	0	0	263	106
P62701-P55072	0.047877	28	80.890000	88.356768	80.774330	153	99	7	4	225	454	72	55	0	263	806
P62701-P61353	0.031606	5	87.030000	91.469354	89.548088	195	64	3	1	88	46	1	1	0	263	136
P62701-P61513	0.033608	15	76.080667	91.349772	86.944891	193	66	3	1	49	36	5	2	0	263	92
P62701-P62995	0.031936	20	54.858500	89.230494	52.937361	153	104	4	2	29	55	12	192	0	263	288
P62701-Q13084	0.031337	2	76.975000	91.603004	87.433516	201	58	3	1	140	101	7	8	0	263	256
P62701-Q5FWF7	0.034291	14	81.225000	91.524335	73.072581	196	62	3	2	3	112	8	32	0	263	155
P62701-Q5JTH9	0.051185	80	62.866125	86.990646	75.819514	122	131	6	4	497	428	120	252	2	263	1297
P62701-Q7Z3K6	0.047632	63	64.940635	92.379848	51.446655	212	46	3	2	2	139	87	322	0	263	550
P62701-Q9UKX7	0.044298	47	67.955957	91.828023	58.879808	203	56	4	0	89	94	45	240	0	263	468
P62714-P18206	0.328757	109	80.550183	90.062265	78.361737	240	49	4	16	261	636	122	115	0	309	1134
P62714-Q9NPJ6	0.123436	73	76.389178	92.698641	63.183111	271	20	6	12	78	49	42	101	0	309	270
P62750-O60296	0.038099	37	66.667568	83.351026	56.450832	78	52	20	6	181	103	136	494	0	156	914
P62750-O75533	0.032625	37	52.110811	74.491923	69.099831	37	61	42	16	121	716	125	342	0	156	1304
P62750-O95486	0.059316	58	70.622414	76.776538	73.250137	54	42	50	10	609	126	19	339	0	156	1093
P62750-P07951	0.032354	8	86.937500	82.395641	87.418486	67	57	31	1	178	75	29	2	0	156	284
P62750-P25398	0.031322	0	0.000000	84.620064	82.614924	78	63	14	1	19	100	4	9	0	156	132
P62750-P35544	0.031336	2	74.900000	85.321026	87.468784	79	63	13	1	34	37	2	1	0	156	74
P62750-P49411	0.031330	2	56.650000	77.564423	81.138252	54	41	55	6	154	221	30	47	0	156	452
P62750-P49721	0.031337	2	76.300000	79.796410	90.438010	57	49	48	2	140	56	3	2	0	156	201
P62750-P61964	0.031322	0	0.000000	81.070577	87.443653	66	47	42	1	241	59	9	25	0	156	334
P62750-P62424	0.040539	32	72.309375	81.567628	83.308383	69	53	30	4	118	107	29	12	0	156	266
P62750-P68104	0.031322	0	0.000000	76.438333	79.579610	30	69	50	7	23	377	59	3	0	156	462
P62750-Q14693	0.032766	30	56.281333	83.974167	59.185652	78	53	22	3	175	178	98	439	0	156	890
P62750-Q2M1K9	0.054270	56	69.611250	75.983654	60.689696	70	28	34	24	8	588	265	423	0	156	1284
P62750-Q8NFU5	0.035552	27	68.465185	84.481474	69.916082	79	55	21	1	197	49	23	147	0	156	416
P62750-Q92552	0.031322	0	0.000000	82.008974	76.323164	80	31	40	5	27	305	28	54	0	156	414
P62750-Q93096	0.031337	2	76.015000	82.025192	82.821098	79	34	42	1	70	80	9	14	0	156	173
P62750-Q96DN2	0.040173	38	68.535526	76.846923	59.711613	72	27	40	17	23	374	166	392	0	156	955
P62750-Q96G25	0.034441	21	70.923810	84.373397	64.375896	81	49	24	2	24	102	55	87	0	156	268
P62750-Q96LZ2	0.031603	8	67.171250	85.801218	66.821643	81	53	21	1	17	187	46	97	0	156	347
P62750-Q9H8M2	0.035679	45	59.527111	83.627564	62.297370	79	51	24	2	102	136	107	252	0	156	597
P62750-Q9UNM6	0.031322	0	0.000000	81.834103	73.410266	67	58	24	7	2	248	121	5	0	156	376
P62750-Q9Y3B3	0.031701	6	83.221667	86.202115	80.223438	80	64	11	1	119	44	35	26	0	156	224
P62750-Q9Y3C7	0.031322	0	0.000000	85.637500	86.773053	80	61	14	1	85	33	11	2	0	156	131
P62750-Q9Y3F4	0.031340	2	83.230000	80.140769	85.741886	76	26	53	1	262	39	9	40	0	156	350
P62753-O43678	0.031535	7	67.358571	88.049237	81.345152	138	100	10	1	37	46	7	9	0	249	99
P62753-O60826	0.050147	23	87.300000	84.744940	72.820175	95	129	23	2	153	244	110	120	0	249	627
P62753-P08123	0.081697	150	61.167067	83.030522	36.811611	62	164	23	0	0	9	53	1304	0	249	1366
P62753-P19784	0.031322	0	0.000000	85.511285	91.092371	99	130	19	1	288	39	3	20	0	249	350
P62753-P23528	0.031322	0	0.000000	87.184378	84.565663	119	115	14	1	28	132	5	1	0	249	166
P62753-P24863	0.031651	9	65.851111	85.846586	87.202792	104	127	17	1	196	58	5	24	0	249	283
P62753-P28074	0.031493	9	56.550000	85.050683	79.383878	93	135	20	1	151	50	6	56	0	249	263
P62753-P36873	0.356112	73	89.239726	85.485020	89.461393	94	134	20	1	262	25	13	23	0	249	323
P62753-Q04828	0.034466	11	90.154545	86.236104	94.189938	103	127	18	1	282	36	2	3	0	249	323
P62753-Q8TAQ2	0.044935	83	59.561446	83.114779	60.955412	65	154	28	2	242	290	102	580	0	249	1214
P62753-Q96BY2	0.032076	15	63.080000	87.251486	76.445328	124	109	15	1	24	236	63	28	0	249	351
P62753-Q96DF8	0.031322	0	0.000000	87.800161	61.131723	129	106	13	1	19	145	148	164	0	249	476
P62753-Q9NTJ3	0.259853	97	79.694330	77.040602	81.333129	41	148	55	5	137	1010	90	51	0	249	1288
P62753-Q9Y5G1	0.078392	106	65.224528	81.698434	71.166921	96	102	46	5	140	466	90	233	0	249	929
P62753-Q9Y6E2	0.042897	34	73.148529	85.268032	88.155632	89	142	17	1	305	76	13	25	0	249	419
P62753-Q9Y6K1	0.034585	30	63.911333	83.746586	70.140329	91	128	28	2	324	246	53	289	0	249	912
P62826-Q9Y2R9	0.033193	14	75.657143	82.581481	82.464628	86	94	23	13	120	83	9	30	0	216	242
P62841-P35754	0.031344	2	90.530000	85.631379	90.702264	78	46	19	2	78	28	0	0	0	145	106
P62841-Q9P209	0.058877	66	68.319545	84.412000	65.139706	76	43	22	4	184	139	59	265	0	145	647
P62851-O14776	0.060629	64	69.315781	66.716160	66.606266	24	44	6	51	123	503	98	374	0	125	1098
P62888-O15194	0.534134	123	86.586667	85.161217	74.287681	69	29	11	6	155	25	7	89	0	115	276
P62888-O15460	0.132826	39	90.435897	84.099565	87.311907	77	18	8	12	334	147	30	24	0	115	535
P62888-O60832	0.355602	72	89.505972	82.918522	77.427374	50	46	13	6	253	122	40	99	0	115	514
P62888-O75874	0.031345	2	93.765000	85.871043	95.192029	82	14	12	7	383	30	1	0	0	115	414
P62888-P30405	0.479663	82	92.023171	86.440609	86.254348	82	16	12	5	159	5	13	30	0	115	207
P62888-P36959	0.317513	54	94.210556	86.252609	94.305478	87	9	13	6	291	50	4	0	0	115	345
P62888-P48382	0.032713	16	68.620000	85.654696	51.867938	85	12	12	6	26	144	37	409	0	115	616
P62888-P62906	0.031322	0	0.000000	81.820783	76.390599	36	60	13	6	0	170	45	2	0	115	217
P62888-P82664	0.031341	3	53.843333	86.219826	73.088109	82	17	10	6	100	20	24	57	0	115	201
P62888-Q13636	0.117077	55	81.137636	86.902783	86.403454	80	18	11	6	133	33	6	22	0	115	194
P62888-Q14974	0.684326	265	83.726792	77.787478	90.477865	18	74	9	14	599	257	20	0	0	115	876
P62888-Q15041	0.032802	10	83.480000	85.868522	81.174828	80	20	10	5	2	191	10	0	0	115	203
P62888-Q6UXB1	0.031322	0	0.000000	86.869565	67.123520	85	14	12	4	0	64	32	29	0	115	125
P62888-Q92572	0.180582	54	86.783148	85.762174	80.931813	79	19	11	6	105	45	10	33	0	115	193
P62888-Q92785	0.044474	33	74.954242	85.299217	62.141407	78	19	12	6	21	143	74	153	0	115	391
P62888-Q96L21	0.031342	2	88.175000	85.152696	84.680374	74	24	11	6	122	53	36	3	0	115	214
P62888-Q96NA8	0.045426	40	71.659000	86.225565	66.665945	84	15	11	5	94	183	44	192	0	115	513
P62888-Q9H190	0.134164	62	80.395645	84.172696	75.373151	70	26	13	6	131	67	26	68	0	115	292
P62888-Q9NW13	0.032008	15	61.985333	86.679391	69.978999	85	15	10	5	262	177	82	238	0	115	759
P62888-Q9NY93	0.033336	27	61.290741	82.721478	78.798080	57	38	8	12	162	272	55	58	0	115	547
P62888-Q9UBQ0	0.328059	76	87.227763	85.250696	93.164505	71	26	11	7	147	35	0	0	0	115	182
P62888-Q9UHA7	0.091809	36	87.285833	86.786087	90.025316	82	16	11	6	113	36	4	5	0	115	158
P62888-Q9Y291	0.031322	0	0.000000	85.334174	84.270755	72	27	11	5	20	80	6	0	0	115	106
P62891-Q9BR77	0.034187	22	68.982727	87.762549	78.424488	23	26	1	1	257	92	46	93	0	51	488
P62899-O43251	0.031611	6	78.491667	87.492560	53.783282	84	23	15	3	76	6	51	257	0	125	390
P62899-O43765	0.055345	21	92.531429	84.483280	78.474952	72	33	9	11	133	80	57	43	0	125	313
P62899-P00813	0.085005	43	82.066047	84.155680	93.285895	75	30	3	17	313	28	15	7	0	125	363
P62899-P17844	0.086617	50	79.162400	82.283280	75.581792	60	43	8	14	304	127	17	166	0	125	614
P62899-P30566	0.032836	10	83.795000	84.882160	94.895496	83	22	5	15	443	31	3	7	0	125	484
P62899-P47928	0.031511	7	65.438571	88.316960	60.851739	90	18	15	2	29	16	45	71	0	125	161
P62899-P48426	0.107852	55	80.118545	82.050320	83.244236	67	35	5	18	250	74	27	55	0	125	406
P62899-P52565	0.045512	29	78.561034	80.338480	81.842990	46	56	6	17	54	124	23	3	0	125	204
P62899-Q6P9H4	0.031833	25	49.249600	83.136480	62.928523	66	39	8	12	140	140	20	255	0	125	555
P62899-Q7L5Y9	0.046766	24	84.102917	81.713840	90.172449	61	41	5	18	281	101	6	8	0	125	396
P62899-Q86VG3	0.031547	10	57.626000	88.017600	58.269186	90	19	15	1	12	46	56	107	0	125	221
P62899-Q8IVH2	0.033734	21	68.236667	85.099360	55.952132	77	28	10	10	96	109	86	389	0	125	680
P62899-Q8IX12	0.037044	25	73.103600	81.494800	67.902661	55	50	4	16	317	315	112	406	0	125	1150
P62899-Q9BYC9	0.031322	0	0.000000	86.779200	85.991074	88	18	12	7	103	17	23	6	0	125	149
P62899-Q9Y6W5	0.033972	21	69.218571	84.082160	62.547651	68	36	12	9	48	140	158	152	0	125	498
P62906-O60826	0.031322	0	0.000000	86.499862	70.960239	63	151	1	2	160	215	119	133	0	217	627
P62906-O75398	0.075783	70	71.139000	87.917281	53.576460	96	118	2	1	74	109	25	357	0	217	565
P62906-O75528	0.033045	24	62.001667	86.041567	65.656134	60	154	2	1	49	174	76	133	0	217	432
P62906-P05413	0.040047	22	80.504545	77.185899	85.266617	0	174	41	2	29	102	2	0	0	217	133
P62906-P0DN79	0.038377	18	83.733333	87.518756	85.890780	78	136	2	1	334	166	11	40	0	217	551
P62906-P15313	0.031322	0	0.000000	81.486866	83.101852	9	195	12	1	213	234	25	41	0	217	513
P62906-P17540	0.159163	70	80.042143	84.074885	86.177446	38	170	8	1	298	63	16	42	0	217	419
P62906-P18206	0.042492	44	67.860682	85.250507	79.215891	51	161	4	1	307	606	105	116	0	217	1134
P62906-P24462	0.097032	48	81.545417	86.046682	88.265209	63	149	4	1	292	177	24	10	0	217	503
P62906-P30405	0.031322	0	0.000000	83.832811	81.414300	33	172	11	1	134	30	1	42	0	217	207
P62906-P30876	0.034951	26	67.758846	83.503594	83.436934	16	190	10	1	310	736	102	26	0	217	1174
P62906-P35249	0.031322	0	0.000000	81.341060	79.396226	9	195	11	2	68	236	24	35	0	217	363
P62906-P35544	0.031333	2	66.270000	78.477788	82.704189	2	182	31	2	0	70	3	1	0	217	74
P62906-P42765	0.031775	7	79.502857	85.492949	96.401209	55	154	7	1	378	16	3	0	0	217	397
P62906-P47756	0.031358	3	70.066667	78.937788	80.737906	4	182	29	2	52	187	30	8	0	217	277
P62906-P51532	0.048253	102	58.437843	84.087834	62.108816	36	172	8	1	145	644	211	647	0	217	1647
P62906-P60900	0.031336	2	74.215000	80.905530	92.059715	9	194	13	1	190	49	4	3	0	217	246
P62906-P61254	0.031322	0	0.000000	80.418249	85.510483	7	193	16	1	65	62	18	0	0	217	145
P62906-P62714	0.126887	50	84.123200	87.588664	92.317120	88	126	2	1	265	27	4	13	0	217	309
P62906-Q09019	0.045359	37	73.163243	85.355576	64.158976	54	157	5	1	215	129	37	293	0	217	674
P62906-Q13503	0.031322	0	0.000000	82.882166	77.861528	22	186	8	1	54	47	25	18	0	217	144
P62906-Q14562	0.045857	38	72.937632	80.751935	69.934943	4	197	15	1	88	684	175	273	0	217	1220
P62906-Q15404	0.040449	29	74.330000	84.456820	91.394116	43	164	9	1	230	27	13	7	0	217	277
P62906-Q6STE5	0.036264	29	68.488621	85.826590	73.560104	64	148	4	1	108	236	33	106	0	217	483
P62906-Q86Y82	0.043108	34	73.314412	85.537419	76.481522	59	152	5	1	83	113	41	39	0	217	276
P62906-Q8IVP5	0.031322	0	0.000000	86.024101	62.349419	61	153	2	1	0	63	60	32	0	217	155
P62906-Q8IY57	0.299258	73	86.788356	88.580645	57.526556	116	98	2	1	11	38	39	92	0	217	180
P62906-Q8IZU1	0.052335	69	65.497101	83.499124	55.228313	20	194	2	1	0	92	91	149	0	217	332
P62906-Q8TCC3	0.031322	0	0.000000	85.642995	65.212422	51	163	2	1	30	32	59	40	0	217	161
P62906-Q93100	0.041393	25	78.742000	83.159539	84.184026	21	184	11	1	552	399	64	78	0	217	1093
P62906-Q96B97	0.031704	14	56.611429	89.204700	58.102391	121	93	2	1	154	74	32	405	0	217	665
P62906-Q96ES7	0.031463	5	73.502000	83.771889	85.537543	34	177	4	2	156	107	17	13	0	217	293
P62906-Q9BUQ8	0.032383	9	82.668889	85.301751	71.890793	44	169	3	1	149	373	141	157	0	217	820
P62906-Q9BXB5	0.101465	70	74.843714	89.407880	70.554267	130	81	5	1	266	222	56	220	0	217	764
P62906-Q9BYD6	0.034198	30	62.727667	87.481751	74.245754	87	127	2	1	120	114	10	81	0	217	325
P62906-Q9H6E5	0.033210	38	54.969737	87.863088	69.397311	116	96	4	1	248	306	54	266	0	217	874
P62906-Q9H9S4	0.048408	24	85.136667	83.779309	88.493650	33	173	10	1	235	79	11	12	0	217	337
P62906-Q9NXR8	0.033618	25	64.053600	86.768111	59.274306	78	136	2	1	66	111	41	200	0	217	418
P62906-Q9NYK5	0.031322	0	0.000000	83.970230	79.948195	32	180	4	1	120	163	11	44	0	217	338
P62906-Q9UID6	0.034603	24	68.452083	86.587465	50.705567	76	138	2	1	0	110	139	236	0	217	485
P62906-Q9UKX7	0.033016	13	76.611538	87.573226	58.511752	93	121	2	1	86	98	40	244	0	217	468
P62906-Q9Y3B2	0.031352	3	65.760000	80.032627	78.514154	6	192	18	1	16	142	29	8	0	217	195
P62906-Q9Y3D5	0.031342	2	86.820000	87.353548	67.498944	83	131	2	1	45	30	18	49	0	217	142
P62906-Q9Y576	0.031322	0	0.000000	83.197281	76.084597	21	186	9	1	71	168	48	48	0	217	335
P62910-O60832	0.031338	2	78.045000	83.182593	77.641440	28	96	7	4	252	130	38	94	0	135	514
P62910-P28070	0.031322	0	0.000000	86.789926	84.519280	66	61	6	2	184	31	14	35	0	135	264
P62910-P68106	0.031322	0	0.000000	88.093111	91.848426	87	39	5	4	82	25	1	0	0	135	108
P62910-Q04446	0.056483	35	79.665143	83.206074	94.032194	39	82	9	5	619	68	8	7	0	135	702
P62910-Q562R1	0.072338	27	90.874444	85.049852	93.458112	51	75	5	4	328	34	10	4	0	135	376
P62910-Q8WZ19	0.031369	4	61.447500	85.375556	78.853100	58	68	5	4	172	68	25	64	0	135	329
P62910-Q92900	0.032714	41	51.234146	81.102519	70.491196	26	92	13	4	373	368	57	331	0	135	1129
P62910-Q96ED9	0.031472	7	61.701429	86.221407	79.436231	67	58	7	3	216	352	77	74	0	135	719
P62910-Q9BVC6	0.031415	6	58.851667	88.794000	74.776996	86	44	3	2	6	169	46	22	0	135	243
P62910-Q9UKB1	0.031482	7	62.751429	80.487852	83.429022	29	81	18	7	358	85	23	76	0	135	542
P62910-Q9UL45	0.031322	0	0.000000	89.067926	80.334477	93	35	5	2	88	31	28	25	0	135	172
P62910-Q9UNA1	0.031660	9	66.216667	83.313481	75.792862	35	89	8	3	406	180	31	197	0	135	814
P62913-O00231	0.031393	3	88.630000	85.747247	78.268318	66	102	3	7	39	284	98	1	0	178	422
P62913-O75015	0.275977	130	75.568692	87.370281	79.722961	113	50	9	6	131	40	20	42	0	178	233
P62913-P11177	0.031322	0	0.000000	86.374438	91.164903	84	84	2	8	314	16	3	26	0	178	359
P62913-P14866	0.113664	53	81.525849	88.231966	73.167844	115	51	5	7	245	134	38	172	0	178	589
P62913-P20618	0.032426	9	83.250000	86.954944	85.595021	103	64	4	7	160	43	16	22	0	178	241
P62913-Q02153	0.039110	18	84.830556	86.301292	81.589596	87	81	2	8	119	432	33	35	0	178	619
P62913-Q14197	0.031322	0	0.000000	89.620730	75.295777	131	38	2	7	90	44	21	51	0	178	206
P62913-Q15042	0.035007	24	69.618333	87.945787	72.684679	111	57	3	7	138	557	83	203	0	178	981
P62913-Q15691	0.317613	87	84.153793	87.565730	71.640896	97	71	3	7	32	149	19	68	0	178	268
P62913-Q6PI98	0.035859	17	80.435882	89.914326	61.876615	131	39	3	5	33	51	27	81	0	178	192
P62913-Q71UM5	0.031680	6	82.240000	85.647079	84.442619	59	109	3	7	28	48	7	1	0	178	84
P62913-Q86VP3	0.235006	103	77.526408	87.583652	63.296805	110	58	3	7	250	165	87	387	0	178	889
P62913-Q8TDR2	0.181064	194	65.739485	83.479494	62.265918	78	77	14	9	112	132	80	210	2	178	534
P62913-Q96L21	0.031591	7	71.094286	87.487528	85.338271	99	69	3	7	117	62	34	1	0	178	214
P62917-O00411	0.042107	78	58.683846	73.773307	78.726846	91	59	61	46	477	460	140	153	0	257	1230
P62917-O14531	0.043138	35	72.739429	77.743268	87.642028	101	75	53	28	448	45	7	72	0	257	572
P62917-O60678	0.039378	23	78.545217	76.052296	82.323070	101	58	61	37	310	121	27	73	0	257	531
P62917-O95931	0.032924	32	56.187812	82.558949	52.540199	125	71	56	5	18	40	31	162	0	257	251
P62917-P10415	0.202357	88	78.566250	80.044786	67.411213	113	67	68	9	50	79	32	78	0	257	239
P62917-P16298	0.037890	29	71.192414	75.853541	82.588187	94	68	56	39	275	141	64	44	0	257	524
P62917-P17844	0.032047	16	61.166250	77.385175	73.821889	96	80	52	29	264	159	22	169	0	257	614
P62917-P19838	0.044915	68	62.363824	77.020000	69.648605	94	67	76	20	192	438	67	271	0	257	968
P62917-P30405	0.034579	17	76.700588	79.175681	79.470193	111	74	50	22	101	63	1	42	0	257	207
P62917-P30837	0.031658	14	55.052143	77.010817	93.818433	101	63	60	33	487	6	2	22	0	257	517
P62917-P31946	0.031471	6	66.965000	77.960272	87.948577	103	62	73	19	169	60	5	12	0	257	246
P62917-P39023	0.033318	18	69.790556	78.004514	89.150546	110	63	58	26	254	127	12	10	0	257	403
P62917-P54259	0.056331	115	59.650348	79.006265	42.532403	115	57	70	15	1	103	125	961	0	257	1190
P62917-P62079	0.035164	16	80.279375	79.958794	85.421604	112	75	52	18	135	102	14	17	0	257	268
P62917-Q01469	0.031674	5	91.224000	81.096887	89.480148	119	70	53	15	80	53	2	0	0	257	135
P62917-Q15172	0.033592	38	56.577895	76.323852	84.880782	93	69	63	32	321	86	31	48	0	257	486
P62917-Q15532	0.061725	124	60.057500	80.227315	44.716627	125	51	67	14	31	20	14	353	2	257	418
P62917-Q16637	0.031440	7	57.981429	82.018327	58.190646	124	64	60	9	27	79	47	141	0	257	294
P62917-Q5T8D3	0.037885	78	55.018718	81.317977	51.687566	124	68	55	10	50	92	49	343	0	257	534
P62917-Q71UM5	0.031689	10	64.318000	79.761362	85.794524	114	70	60	13	42	33	8	1	0	257	84
P62917-Q7L5Y9	0.033691	23	66.072609	79.760584	87.807525	113	70	63	11	226	144	16	10	0	257	396
P62917-Q86YP4	0.042171	73	59.634384	79.268288	48.827520	113	60	73	11	12	125	70	426	0	257	633
P62917-Q8TF74	0.032057	30	49.992000	81.885642	49.450000	126	64	59	8	0	41	136	263	0	257	440
P62917-Q9BQ90	0.054882	33	80.386970	77.413230	92.447094	104	71	47	35	330	35	5	12	0	257	382
P62917-Q9H2H8	0.128740	43	87.684419	80.590389	91.195404	115	77	50	15	127	32	2	0	0	257	161
P62917-Q9NQZ8	0.086518	79	70.861013	74.946576	71.581166	79	78	68	32	9	351	3	126	0	257	489
P62917-Q9NU53	0.032482	17	65.114706	82.723502	62.250030	126	78	40	13	5	172	22	131	0	257	330
P62917-Q9NVM6	0.031370	3	77.643333	80.363502	78.515987	123	67	46	21	55	192	28	29	0	257	304
P62917-Q9NVR2	0.034965	36	61.638889	78.479339	78.546535	115	52	70	20	261	301	42	106	0	257	710
P62917-Q9NY12	0.031369	6	47.215000	80.241012	60.845023	119	57	72	9	31	61	14	111	0	257	217
P62917-Q9NY33	0.409901	103	84.700680	77.280233	89.590204	97	71	62	27	485	216	28	8	0	257	737
P62917-Q9P0V9	0.031837	22	51.375909	77.459377	75.358921	108	54	71	24	73	257	60	64	0	257	454
P62917-Q9UBP0	0.044969	52	66.630577	79.252724	71.578588	108	81	43	25	203	199	51	163	0	257	616
P62917-Q9UHY7	0.032866	14	73.346429	77.011167	92.678084	112	47	65	33	224	27	8	2	0	257	261
P62917-Q9Y230	0.037500	22	76.920909	75.740545	80.019870	82	84	58	33	102	282	38	41	0	257	463
P62917-Q9Y3B9	0.031423	10	46.839000	82.012724	56.265177	121	71	61	4	0	103	44	135	0	257	282
P62917-Q9Y6Y0	0.042040	87	57.203793	77.836848	82.188629	103	79	42	33	375	154	31	82	0	257	642
P63104-P13929	0.074541	31	87.733226	89.646367	95.350230	191	39	3	12	395	36	3	0	0	245	434
P67775-Q9UFF9	0.202934	62	85.267097	92.173269	85.909384	253	39	3	14	197	56	6	33	0	309	292
P67812-P08754	0.367854	83	87.126627	84.191453	90.286723	64	96	16	3	248	88	14	4	0	179	354
P68104-P11142	0.315493	118	78.694661	88.232597	82.262632	243	205	11	3	261	277	70	38	0	462	646
P68104-Q96GM5	0.034185	25	66.234800	86.660758	70.990544	201	244	14	3	117	221	48	129	0	462	515
P68104-Q9NPI1	0.090843	94	68.723511	87.979935	52.598018	233	215	12	2	70	112	81	388	0	462	651
P68104-Q9NY33	0.390528	100	84.486700	89.385996	89.208820	280	171	8	3	483	211	35	8	0	462	737
P68400-O95198	0.165025	49	87.826735	82.433836	90.074452	242	76	14	59	462	91	10	30	0	391	593
P68400-O95478	0.031322	0	0.000000	85.750230	77.225923	281	52	4	54	38	160	39	23	0	391	260
P78371-P09012	0.044274	47	67.940851	87.685271	71.915106	313	178	34	10	121	54	9	98	0	535	282
P78371-P68400	0.348887	129	78.515349	85.745888	83.909565	275	201	39	20	263	65	7	56	0	535	391
P78371-Q14011	0.047551	57	66.508070	86.168673	61.155233	250	237	40	8	44	34	4	90	0	535	172
P78371-Q9UKF6	0.052828	40	75.383500	85.418299	85.316754	248	232	36	19	301	320	50	13	0	535	684
P78410-Q9NQ29	0.036940	18	81.207778	83.881766	73.980782	151	136	33	14	122	120	52	77	0	334	371
P82650-O95684	0.038864	35	68.674286	77.844500	52.381053	123	167	5	65	1	97	67	234	0	360	399
P82650-P52434	0.033375	14	76.775714	77.566833	82.050733	135	156	4	65	48	73	27	2	0	360	150
P82673-O43175	0.036140	18	79.509444	69.971827	89.589568	53	128	89	53	346	154	25	8	0	323	533
P82673-Q8N9F7	0.093438	59	76.937288	74.881455	90.955669	72	151	51	49	249	41	23	1	0	323	314
P82673-Q9H2W6	0.044509	52	66.349231	71.385418	77.000645	56	147	59	61	99	115	20	45	0	323	279
P82673-Q9H7B2	0.034323	24	67.556667	76.330929	84.750131	58	197	20	48	120	165	16	5	0	323	306
P82675-O43293	0.043779	62	63.075806	67.524372	78.035705	127	93	85	125	173	143	85	53	0	430	454
P82675-Q9Y3D5	0.031322	0	0.000000	73.437930	72.030493	169	92	75	94	58	28	9	47	0	430	142
P82912-P25705	0.031322	0	0.000000	71.735515	84.791483	85	28	26	55	314	168	18	53	0	194	553
P82933-P33552	0.031322	0	0.000000	78.118030	87.541013	173	128	27	68	47	25	4	3	0	396	79
P82933-P35227	0.033287	26	61.761923	75.450657	66.034593	120	163	46	67	89	92	29	134	0	396	344
P83731-O95863	0.050816	39	75.027692	80.197771	60.441250	64	54	37	2	1	105	37	121	0	157	264
P83731-P02689	0.031322	0	0.000000	76.813057	90.397652	54	46	48	9	90	40	1	1	0	157	132
P83731-P22087	0.219680	81	80.983086	75.551274	77.618193	43	60	38	16	185	45	8	83	0	157	321
P83731-P23416	0.031618	9	64.353333	72.941911	79.713650	37	61	34	25	189	160	52	51	0	157	452
P83731-P28335	0.038630	32	70.157812	75.149427	69.704476	36	68	34	19	126	149	33	150	0	157	458
P83731-P32249	0.032827	11	80.382727	75.910255	82.768643	40	62	38	17	175	119	31	36	0	157	361
P83731-P54105	0.031342	3	55.446667	76.708662	72.317553	57	43	47	10	72	63	51	51	0	157	237
P83731-P63010	0.034079	53	53.397358	71.543949	75.721249	14	83	32	28	74	694	43	126	0	157	937
P83731-Q13394	0.034338	17	75.838235	73.194140	92.522758	41	57	31	28	303	42	14	0	0	157	359
P83731-Q13409	0.031357	6	42.646667	75.453503	71.499671	32	80	20	25	114	313	62	149	0	157	638
P83731-Q14154	0.033084	14	74.933571	77.324522	61.066777	56	58	17	26	176	40	36	263	0	157	515
P83731-Q15061	0.031322	0	0.000000	77.238662	68.587016	52	61	25	19	69	334	69	205	0	157	677
P83731-Q4V328	0.056277	39	77.237949	71.715732	75.281974	44	50	33	30	130	491	98	122	0	157	841
P83731-Q6GTX8	0.031511	7	65.404286	79.652611	68.859582	71	45	30	11	110	23	51	103	0	157	287
P83731-Q6P2E9	0.044247	68	61.977353	74.044968	60.054240	38	67	26	26	270	300	209	622	0	157	1401
P83731-Q6UWR7	0.034966	16	79.671250	79.217643	91.257227	59	50	41	7	364	29	21	26	0	157	440
P83731-Q92547	0.052706	81	63.237778	73.451592	65.671439	24	83	23	27	267	580	125	550	0	157	1522
P83731-Q96G25	0.031361	3	72.483333	75.005478	69.833097	53	45	36	23	54	115	15	84	0	157	268
P83731-Q96HR3	0.031334	2	67.305000	74.372038	73.741629	54	37	49	17	68	38	36	36	0	157	178
P83731-Q96MX6	0.032731	13	74.333846	76.751911	93.655434	43	64	35	15	304	45	8	0	0	157	357
P83731-Q99798	0.189147	68	82.578529	73.237452	92.199474	39	62	30	26	651	97	5	27	0	157	780
P83731-Q9H8H2	0.032238	14	67.066429	76.245541	66.561105	35	77	24	21	228	247	42	334	0	157	851
P83731-Q9Y4Z2	0.031855	9	72.756667	78.980764	62.956822	64	41	46	6	58	12	53	91	0	157	214
P84098-O00567	0.033588	31	59.917742	83.284235	72.630556	57	111	25	3	120	309	32	133	0	196	594
P84098-O14524	0.031362	3	72.720000	90.545714	73.623986	148	44	3	1	98	191	84	71	0	196	444
P84098-O95478	0.031322	0	0.000000	89.219388	83.237577	134	56	5	1	99	119	36	6	0	196	260
P84098-P04075	0.032743	8	91.811250	86.791684	93.932830	86	98	11	1	332	12	18	2	0	196	364
P84098-P08621	0.033704	24	65.245000	86.814694	68.694851	122	52	21	1	49	210	59	119	0	196	437
P84098-P0DPB5	0.031334	2	68.205000	89.761633	62.962377	140	45	11	0	3	51	23	45	0	196	122
P84098-P13804	0.037290	22	76.562273	84.649847	87.604354	63	111	21	1	199	111	10	13	0	196	333
P84098-P30405	0.031322	0	0.000000	89.915306	81.619179	141	49	6	0	116	48	7	36	0	196	207
P84098-P43363	0.032363	25	56.246000	90.483929	68.226260	146	46	3	1	116	101	22	130	0	196	369
P84098-P48735	0.031404	3	92.466667	83.872908	90.129270	73	98	23	2	384	27	2	39	0	196	452
P84098-P67936	0.031344	2	91.360000	88.313112	89.179234	115	73	6	2	176	55	12	5	0	196	248
P84098-P68104	0.032420	10	79.369000	84.492755	83.037554	59	113	23	1	73	356	30	3	0	196	462
P84098-Q13084	0.031611	5	87.342000	88.544643	89.437930	118	69	8	1	164	79	11	2	0	196	256
P84098-Q13303	0.031322	0	0.000000	83.745714	87.793351	82	91	16	7	268	56	8	35	0	196	367
P84098-Q13464	0.066854	74	68.467162	76.872959	73.965436	37	111	29	19	167	804	216	167	0	196	1354
P84098-Q16637	0.031670	12	58.938333	91.222143	62.589048	151	40	5	0	53	59	56	126	0	196	294
P84098-Q86W11	0.053896	43	74.356744	85.835561	63.658644	105	67	22	2	11	268	7	208	0	196	494
P84098-Q8IUF1	0.032035	8	81.300000	87.474796	73.758025	124	51	21	0	65	196	69	65	0	196	395
P84098-Q96LX8	0.060312	74	66.893784	86.404235	57.148255	115	58	22	1	2	170	51	201	0	196	424
P84098-Q99798	0.048821	23	86.540435	82.892398	92.106051	65	104	24	3	640	108	5	27	0	196	780
P84098-Q9BW66	0.031322	0	0.000000	89.204490	82.811085	126	64	4	2	110	57	28	17	0	196	212
P84098-Q9NVM9	0.034622	39	59.432051	84.788520	75.050099	74	102	18	2	266	186	133	121	0	196	706
P84098-Q9NVP2	0.033148	14	75.367143	90.083214	80.049653	147	44	5	0	127	26	3	46	0	196	202
P84098-Q9NW13	0.036912	50	59.959000	88.550867	70.575138	138	42	14	2	291	154	81	233	0	196	759
P84098-Q9UN74	0.032547	21	61.161905	84.600765	73.445364	88	80	26	2	315	321	53	258	0	196	947
P84098-Q9Y2R9	0.031465	8	57.015000	88.402857	83.867810	126	54	14	2	137	65	10	30	0	196	242
P84098-Q9Y3D3	0.031342	2	87.860000	89.750510	87.098175	142	41	13	0	102	17	8	10	0	196	137
P84098-Q9Y6J9	0.031977	19	56.514737	85.991224	62.717572	90	91	13	2	89	227	49	257	0	196	622
P85298-P0DN79	0.083728	63	74.301270	72.353750	85.045045	123	184	55	102	319	172	19	41	0	464	551
P98077-P09622	0.276469	157	72.767580	57.458127	90.612672	76	166	43	297	433	38	2	36	0	582	509
Q02543-O43768	0.031322	0	0.000000	89.441364	57.404380	136	26	13	1	0	28	48	45	0	176	121
Q02543-O95229	0.099160	50	80.980400	89.034375	71.933069	122	48	4	2	63	110	39	65	0	176	277
Q02543-O95239	0.085740	58	76.133276	81.169034	69.545909	57	89	13	17	127	660	180	265	0	176	1232
Q02543-O95861	0.114464	37	89.735946	86.144034	93.705260	96	58	19	3	261	40	5	2	0	176	308
Q02543-P08865	0.140481	46	87.245435	86.020170	75.809695	87	67	20	2	137	73	13	72	0	176	295
Q02543-P11926	0.031690	15	54.737333	83.064148	85.769805	82	62	21	11	309	90	8	54	0	176	461
Q02543-P16930	0.031463	4	85.227500	85.734773	96.847566	95	54	22	5	401	18	0	0	0	176	419
Q02543-P30101	0.031342	2	88.000000	84.509261	87.762653	86	61	25	4	346	116	10	33	0	176	505
Q02543-P56199	0.031804	17	55.308824	81.616023	81.941756	67	76	21	12	408	573	126	72	0	176	1179
Q02543-P67775	0.073473	37	83.200000	83.675795	92.369029	78	69	24	5	267	25	3	14	0	176	309
Q02543-Q09028	0.040677	33	71.810606	82.274602	89.365035	70	76	22	8	328	49	15	33	0	176	425
Q02543-Q12906	0.103148	143	64.239441	84.619716	62.188881	86	62	21	7	310	115	26	443	0	176	894
Q02543-Q13084	0.031322	0	0.000000	88.509318	89.140312	131	24	18	3	164	79	6	7	0	176	256
Q02543-Q13363	0.054053	27	84.924444	85.156250	79.716886	92	57	21	6	267	64	7	102	0	176	440
Q02543-Q13522	0.031322	0	0.000000	91.278011	52.856374	140	31	4	1	0	21	62	88	0	176	171
Q02543-Q14934	0.080291	103	65.919417	85.942955	53.063392	85	73	13	5	167	104	43	588	0	176	902
Q02543-Q562F6	0.123900	134	66.953657	87.617557	38.559217	114	48	11	3	66	25	35	1139	0	176	1265
Q02543-Q5J8M3	0.031322	0	0.000000	88.610568	69.483552	125	39	9	3	4	105	38	36	0	176	183
Q02543-Q8TD55	0.147266	97	73.514948	88.177500	56.150061	111	53	10	2	54	105	57	274	0	176	490
Q02543-Q92949	0.173622	158	68.001772	89.185341	51.350926	125	40	9	2	45	53	42	281	0	176	421
Q02543-Q96CW5	0.031334	2	69.820000	83.383977	72.523539	75	72	21	8	152	481	81	193	0	176	907
Q02543-Q96GQ7	0.033109	33	56.688788	82.901250	69.031595	72	74	23	7	156	314	113	213	0	176	796
Q02543-Q99496	0.032581	22	60.520000	87.897159	69.644226	111	47	16	2	56	146	53	81	0	176	336
Q02543-Q9HCN4	0.085936	73	72.080411	85.543068	77.071257	65	104	4	3	126	155	24	69	0	176	374
Q02543-Q9NV56	0.031322	0	0.000000	89.683295	58.739902	129	41	4	2	5	72	25	102	0	176	204
Q02543-Q9Y2R5	0.031322	0	0.000000	90.426080	85.141923	142	28	4	2	78	25	23	4	0	176	130
Q02809-Q15544	0.064539	51	74.377255	91.038253	60.410569	556	136	23	12	27	75	13	96	0	727	211
Q02878-O43257	0.031379	3	82.453333	75.153229	69.811364	92	104	53	39	19	66	44	25	0	288	154
Q02878-O43639	0.038949	36	68.235000	72.352465	75.487184	85	79	75	49	145	135	11	89	0	288	380
Q02878-P05141	0.073964	78	69.047564	68.136111	82.272181	15	138	68	67	65	202	30	1	0	288	298
Q02878-P05164	0.040007	28	74.633929	68.379722	86.980913	65	82	68	73	517	135	39	54	0	288	745
Q02878-P14678	0.033816	37	57.828378	73.319653	62.118542	81	97	66	44	48	30	73	89	0	288	240
Q02878-P16278	0.044650	21	86.222857	70.060069	88.153944	54	107	75	52	551	40	16	70	0	288	677
Q02878-P22001	0.039376	66	58.780152	70.897535	66.501670	73	87	78	50	137	193	35	210	0	288	575
Q02878-P31150	0.033995	18	73.006667	68.662951	89.989508	39	115	74	60	325	104	8	10	0	288	447
Q02878-P35249	0.054213	48	72.361875	69.913056	82.019229	23	144	72	49	130	182	16	35	0	288	363
Q02878-P35544	0.031322	0	0.000000	75.280486	89.596892	92	107	51	38	43	30	0	1	0	288	74
Q02878-P40925	0.032338	15	66.576000	71.281458	92.427275	42	128	74	44	274	55	5	0	0	288	334
Q02878-P52948	0.068118	174	57.347184	67.863750	55.975151	34	120	70	64	159	541	178	939	0	288	1817
Q02878-P62993	0.031587	6	76.921667	73.417292	85.489816	84	95	66	43	77	125	11	4	0	288	217
Q02878-Q00839	0.035386	80	51.203625	68.235521	63.392800	32	119	71	66	240	171	49	365	0	288	825
Q02878-Q01085	0.031584	16	49.619375	73.493611	72.896480	76	104	67	41	139	102	24	110	0	288	375
Q02878-Q09028	0.031607	11	58.428182	69.823715	86.773294	23	138	83	44	278	98	20	29	0	288	425
Q02878-Q12972	0.032090	21	56.301905	73.507222	62.280370	88	85	74	41	88	44	65	154	0	288	351
Q02878-Q13895	0.033987	51	53.643333	70.764410	73.299908	48	117	73	50	170	113	54	100	0	288	437
Q02878-Q15334	0.038299	73	56.325205	69.055660	75.691795	48	106	73	61	350	414	107	193	0	288	1064
Q02878-Q16864	0.031322	0	0.000000	74.809931	84.705294	80	115	57	36	51	55	10	3	0	288	119
Q02878-Q4VC05	0.031367	3	76.300000	77.519062	51.235524	104	103	44	37	1	35	37	137	0	288	210
Q02878-Q5JS54	0.031322	0	0.000000	74.000833	84.804390	88	104	51	45	59	53	2	9	0	288	123
Q02878-Q6NVY1	0.041029	31	73.463548	71.718125	91.778705	42	130	75	41	333	18	17	18	0	288	386
Q02878-Q6P4R8	0.048880	138	55.093043	70.200278	53.330139	65	91	77	55	100	355	100	744	5	288	1299
Q02878-Q7L8S5	0.032845	17	68.161765	74.530312	81.232153	86	101	60	41	129	109	19	31	0	288	288
Q02878-Q7Z4G1	0.031342	2	88.140000	76.838681	81.915412	98	104	51	35	40	29	7	9	0	288	85
Q02878-Q8IVW6	0.049396	81	61.987407	73.543750	53.576435	87	93	61	47	37	126	58	340	0	288	561
Q02878-Q8IXB3	0.084978	57	76.340702	76.234201	57.216610	76	128	49	35	0	69	14	94	0	288	177
Q02878-Q8N8U2	0.035749	43	60.380465	70.969549	69.055494	54	112	73	49	205	95	13	193	0	288	506
Q02878-Q8NB46	0.360376	137	77.977956	67.181910	83.211199	35	111	70	72	510	417	59	90	0	288	1076
Q02878-Q96GY0	0.034381	37	59.628649	74.286701	60.496615	87	98	67	36	18	107	52	148	0	288	325
Q02878-Q96L21	0.031757	10	66.656000	72.473090	86.697196	56	124	60	48	119	75	17	3	0	288	214
Q02878-Q96S59	0.033168	57	49.280877	72.055972	69.662963	78	86	76	48	296	141	34	258	0	288	729
Q02878-Q99547	0.031907	9	74.105556	75.977604	72.535000	99	100	48	41	0	94	63	3	0	288	160
Q02878-Q9H0E9	0.040022	107	53.232991	71.297361	52.447466	88	71	75	54	211	154	87	783	0	288	1235
Q02878-Q9HC38	0.033576	27	62.377407	71.870660	86.064856	59	108	80	41	200	71	13	29	0	288	313
Q02878-Q9NP92	0.031534	13	51.047692	72.791007	82.903508	77	96	73	42	245	119	23	52	0	288	439
Q02878-Q9UK13	0.067990	62	71.657581	68.474931	68.899968	55	87	85	61	0	420	54	143	0	288	617
Q02878-Q9Y2Q9	0.031775	8	74.416250	76.316250	70.280000	101	98	52	37	64	48	11	64	0	288	187
Q03591-O60341	0.446025	171	77.632515	79.754606	78.592195	37	242	31	20	494	154	22	182	0	330	852
Q04917-P07108	0.363701	68	91.065147	93.500285	92.508506	214	23	7	2	68	16	3	0	0	246	87
Q04917-Q9P0L0	0.440213	149	79.554564	92.527683	68.800241	208	27	9	2	75	60	38	76	0	246	249
Q07020-P05091	0.031322	0	0.000000	79.014096	94.233636	99	36	26	27	486	8	1	22	0	188	517
Q07020-P08621	0.031991	23	53.280435	81.204947	66.903089	98	52	19	19	47	194	68	128	0	188	437
Q07020-P11766	0.031322	0	0.000000	80.996915	95.538021	96	55	16	21	352	20	2	0	0	188	374
Q07020-P17252	0.088887	39	84.910256	80.204096	78.372485	79	71	16	22	260	247	68	97	0	188	672
Q07020-P26368	0.031663	11	60.796364	81.561543	73.900821	100	50	20	18	107	214	69	85	0	188	475
Q07020-P28074	0.031322	0	0.000000	80.896383	80.384905	88	64	11	25	163	37	10	53	0	188	263
Q07020-P30405	0.031322	0	0.000000	81.558138	82.350386	91	61	16	20	127	37	8	35	0	188	207
Q07020-P49761	0.036525	55	57.960182	78.005053	66.398511	66	77	18	27	265	82	7	284	0	188	638
Q07020-P57086	0.031408	4	74.330000	85.494468	59.112458	107	50	30	1	26	34	23	96	0	188	179
Q07020-P61024	0.031322	0	0.000000	84.780904	87.475696	110	44	30	4	49	22	4	4	0	188	79
Q07020-P62917	0.032959	12	78.642500	81.856755	79.620350	100	51	13	24	119	53	78	7	0	188	257
Q07020-P63316	0.056886	44	74.985909	82.147872	74.124534	95	58	21	14	0	115	37	9	0	188	161
Q07020-Q07666	0.034651	26	66.913846	83.977713	60.789616	101	54	30	3	61	103	56	223	0	188	443
Q07020-Q15528	0.031355	5	46.378000	86.226649	73.446300	114	43	30	1	83	41	23	53	0	188	200
Q07020-Q16540	0.074001	28	90.285357	84.801596	82.716471	108	47	18	15	61	56	34	2	0	188	153
Q07020-Q16576	0.034169	14	80.720714	78.652128	89.401929	72	77	12	27	328	55	10	32	0	188	425
Q07020-Q5H9L4	0.045847	56	65.905893	84.173138	63.455844	104	50	32	2	98	113	64	187	0	188	462
Q07020-Q8N4P2	0.033640	11	86.108182	80.274309	89.599444	91	55	22	20	496	122	24	23	0	188	665
Q07020-Q92665	0.032476	18	63.772222	86.373457	59.530810	115	40	33	0	46	108	62	179	0	188	395
Q07020-Q92747	0.031356	3	68.416667	78.378511	89.950270	89	43	28	28	279	57	27	7	0	188	370
Q07020-Q96GQ7	0.035588	36	63.045833	80.230745	69.404673	77	73	22	16	155	312	127	202	0	188	796
Q07020-Q96L21	0.058955	39	78.155897	82.187660	87.907430	92	60	26	10	129	67	16	2	0	188	214
Q07020-Q9BV38	0.054615	22	90.810909	80.282287	82.186134	71	80	27	10	204	145	47	36	0	188	432
Q07020-Q9BYD1	0.110548	34	91.396765	84.112713	90.754438	108	48	21	11	130	43	4	1	0	188	178
Q07020-Q9NVM4	0.038385	20	80.800000	77.794149	90.158237	94	38	23	33	504	151	30	7	0	188	692
Q07020-Q9NXC5	0.031322	0	0.000000	78.229681	77.907989	77	68	10	33	277	375	118	105	0	188	875
Q07020-Q9Y2D8	0.031400	3	90.993333	83.767128	65.202524	102	52	26	8	132	174	88	220	0	188	614
Q07020-Q9Y3C1	0.033453	14	77.225000	85.877713	82.240225	111	46	30	1	79	63	22	14	0	188	178
Q07955-O95198	0.343900	78	87.373974	69.197460	90.693086	65	87	10	86	473	83	11	26	0	248	593
Q08043-Q8TCC3	0.031322	0	0.000000	81.850622	66.062733	246	546	63	46	23	51	54	33	0	901	161
Q08945-Q9BYD1	0.064490	80	66.724500	73.321523	86.078539	194	291	43	181	89	69	16	4	0	709	178
Q09028-O95182	0.031322	0	0.000000	90.367882	52.014159	340	47	15	23	0	11	47	55	0	425	113
Q09028-Q96EL2	0.031957	15	61.074000	89.995153	67.213353	332	52	16	25	37	48	32	50	0	425	167
Q10570-Q8NFT6	0.633288	568	69.927394	79.426445	41.993496	620	529	83	211	11	113	55	436	8	1443	615
Q12788-Q92922	0.060386	134	58.801343	85.484988	57.277638	310	433	37	28	67	373	140	525	2	808	1105
Q12824-P40189	0.102408	156	63.060128	67.765818	72.084085	29	207	52	97	380	232	37	269	0	385	918
Q12824-Q9BTV7	0.138588	133	68.170000	72.842857	55.394310	65	194	58	68	31	137	72	238	0	385	478
Q12824-Q9P258	0.433794	211	74.162559	70.255714	81.710249	38	206	67	74	331	86	15	90	2	385	522
Q12905-P35544	0.053224	35	78.383143	87.427487	90.012162	302	34	6	48	57	13	2	2	0	390	74
Q12905-Q9NX20	0.031578	18	47.343333	82.443231	81.017530	213	121	5	51	98	110	15	28	0	390	251
Q12950-Q92901	0.105528	139	64.842806	47.617130	87.071351	34	51	37	317	219	158	16	14	0	439	407
Q12959-P33176	0.642576	780	67.110987	68.061659	73.554444	101	460	68	275	180	501	179	103	76	904	963
Q13042-Q92688	0.082606	60	75.005500	79.155258	71.717291	301	174	29	116	120	36	1	94	0	620	251
Q13084-Q13610	0.033172	20	66.530500	82.016406	77.203253	92	124	22	18	246	109	49	97	0	256	501
Q13123-Q9HBM6	0.075443	106	64.753396	63.791149	63.101633	27	197	193	140	56	50	41	104	4	557	251
Q13131-O75528	0.052051	63	66.827619	73.421574	63.722731	196	191	33	139	52	152	96	132	0	559	432
Q13200-P07237	0.031772	12	62.174167	70.064813	71.245610	0	563	267	78	30	257	173	48	0	908	508
Q13200-P17540	0.042145	59	62.729322	68.097941	82.892005	0	465	360	83	242	113	23	41	0	908	419
Q13200-P30050	0.032074	32	49.271250	61.517544	67.279273	0	213	578	117	0	72	81	12	0	908	165
Q13200-P31150	0.035744	48	58.656042	68.085870	84.002685	0	481	339	88	90	337	7	13	0	908	447
Q13200-Q13901	0.031397	6	55.271667	61.435980	66.051560	0	240	534	134	0	79	37	25	0	908	141
Q13200-Q86W42	0.042113	47	66.409574	70.383359	79.352346	0	570	258	80	31	252	44	14	0	908	341
Q13227-Q9UPN7	0.188563	211	65.078152	48.818379	66.410454	1	94	17	215	331	132	55	363	0	327	881
Q13310-P46779	0.037587	27	72.277407	71.854146	86.345328	151	292	32	169	65	59	13	0	0	644	137
Q13347-P30566	0.031322	0	0.000000	91.156738	93.785930	257	50	14	4	429	42	6	7	0	325	484
Q13347-P31943	0.138096	97	72.835876	90.795231	61.498263	245	62	17	1	16	214	33	186	0	325	449
Q13363-Q5VUJ6	0.124859	77	75.580130	77.776545	60.328183	234	96	7	103	168	167	72	358	0	440	765
Q13409-Q9GZV8	0.099249	126	65.513730	71.984420	55.257040	156	283	32	167	0	239	53	279	0	638	571
Q13418-Q14508	0.079203	56	75.708214	84.685996	67.026935	218	185	27	22	9	64	17	34	0	452	124
Q13435-Q96GC5	0.034418	56	53.585000	59.424525	70.600991	6	332	201	356	73	61	16	62	0	895	212
Q13435-Q9BYM8	0.117386	148	65.091419	55.137587	79.742294	1	264	211	419	95	340	36	39	0	895	510
Q13547-P15311	0.031758	9	69.877778	81.243506	82.648908	336	30	11	105	258	247	24	57	0	482	586
Q13547-Q15050	0.035301	39	61.059487	82.342510	67.198712	344	26	25	87	1	191	97	76	0	482	365
Q13547-Q9UEE9	0.133807	49	85.223469	83.857593	51.472742	351	21	31	79	0	85	41	173	0	482	299
Q13561-P22234	0.031340	2	83.750000	65.549651	91.204353	1	172	161	67	316	98	8	3	0	401	425
Q13561-P52434	0.031322	0	0.000000	69.934464	80.211733	50	161	143	47	38	81	29	2	0	401	150
Q13561-Q3KNV8	0.035649	18	78.319444	68.532369	75.904752	55	137	145	64	48	134	18	42	0	401	242
Q13561-Q9BYD3	0.036816	32	67.520000	70.415611	78.619807	52	157	147	45	168	70	14	59	0	401	311
Q13573-O15151	0.048302	139	54.791223	68.000019	54.518061	37	223	208	68	53	108	36	293	0	536	490
Q13573-Q96GM5	0.045005	62	63.811452	65.009235	73.572563	4	217	236	79	173	176	38	128	0	536	515
Q13573-Q9NUY8	0.036796	51	59.486667	60.851306	75.971059	0	181	208	147	230	289	33	147	0	536	699
Q13636-P35268	0.185416	71	81.513380	87.324897	82.272734	135	33	6	20	68	31	11	18	0	194	128
Q13637-Q9Y580	0.250310	116	76.278362	83.195867	55.716128	133	37	40	15	53	37	9	167	0	225	266
Q13769-O60508	0.033693	25	64.371200	78.699151	76.332746	110	448	59	66	271	109	108	91	0	683	579
Q13868-O75832	0.031336	2	73.735000	81.033311	93.427035	98	143	29	23	202	15	5	4	0	293	226
Q13868-P52272	0.040012	64	59.802812	80.038464	52.802466	86	148	35	24	36	189	57	448	0	293	730
Q13868-Q15181	0.031900	8	78.105000	81.314130	92.664429	107	131	36	19	240	38	9	2	0	293	289
Q13868-Q8TDN6	0.136325	78	76.337051	81.350956	77.322946	79	164	36	14	131	124	44	54	0	293	353
Q14003-P09493	0.041708	50	65.043600	62.264386	84.085563	127	230	71	329	32	237	14	1	0	757	284
Q14141-P11142	0.071852	80	68.257250	79.593894	82.767802	119	234	33	48	270	284	55	37	4	434	646
Q14152-O75683	0.084239	187	58.911551	63.469226	59.026233	158	522	254	448	0	161	63	137	11	1382	361
Q14152-O75771	0.036427	52	58.629038	62.429631	83.005030	137	534	235	476	109	176	29	14	0	1382	328
Q14152-P01889	0.173595	223	63.666906	61.826831	73.357459	135	553	198	496	52	201	44	65	0	1382	362
Q14152-P61978	0.159914	361	57.784488	62.711071	59.316134	103	602	231	446	31	199	14	219	15	1382	463
Q14152-Q13247	0.055395	198	53.284444	62.604501	56.589419	163	523	214	482	52	93	10	189	0	1382	344
Q14152-Q15329	0.111030	174	62.514368	62.567590	57.217659	185	497	183	517	0	110	92	144	0	1382	346
Q14152-Q8TDN6	0.058188	129	58.726434	62.939515	71.841331	168	505	239	470	83	146	35	89	0	1382	353
Q14168-O75112	0.311621	236	68.578602	73.641597	52.788088	159	230	68	119	64	191	28	444	0	576	727
Q14197-O15144	0.049764	64	65.656562	69.646408	86.291833	52	77	13	64	138	138	18	6	0	206	300
Q14197-P08865	0.031868	11	66.976364	71.904709	76.670271	70	61	15	60	163	48	9	75	0	206	295
Q14203-O43639	0.037659	35	67.103714	72.758599	74.745711	222	676	139	241	160	115	10	95	0	1278	380
Q14203-Q13227	0.089486	223	57.596099	74.951228	46.129480	307	631	106	234	0	91	12	224	0	1278	327
Q14203-Q6ZMI0	0.309119	260	67.299577	69.692113	70.863641	169	672	177	260	136	366	148	130	0	1278	780
Q14232-O00294	0.074536	67	71.651045	89.575148	59.628542	195	88	22	0	113	123	48	258	0	305	542
Q14683-Q96LX8	0.405308	279	69.565090	81.309643	53.226509	91	1013	106	23	0	149	40	235	0	1233	424
Q14722-Q6ZMV9	0.033310	18	69.748889	79.820406	68.556265	245	74	22	78	95	401	128	190	0	419	814
Q15019-P13639	0.060044	58	70.831552	70.829169	85.408450	21	209	64	67	312	483	56	7	0	361	858
Q15019-P13804	0.034431	19	73.301579	75.095540	89.036937	40	216	56	49	242	71	4	16	0	361	333
Q15019-P28331	0.082725	51	78.125882	74.530526	88.137442	29	219	65	48	471	215	8	33	0	361	727
Q15019-Q16665	0.091548	172	60.736395	73.844681	52.987881	28	215	70	48	105	167	75	479	0	361	826
Q15019-Q8TDR0	0.032071	18	59.032778	78.083158	56.173980	60	222	43	36	63	205	47	376	0	361	691
Q15024-P56537	0.031373	3	79.686667	80.460962	85.049224	52	187	43	9	77	147	10	11	0	291	245
Q15024-Q12905	0.036714	28	70.045714	83.167663	81.721538	77	183	21	10	195	128	15	52	0	291	390
Q15024-Q9UBU8	0.049870	54	68.499630	84.077629	68.644171	97	170	13	11	19	211	28	104	0	291	362
Q15050-Q96RN5	0.036717	97	51.025361	69.865342	58.538972	21	199	76	69	81	226	103	378	0	365	788
Q15269-O60508	0.062287	83	65.651205	80.711513	74.385164	350	393	87	89	188	200	84	107	0	919	579
Q15287-Q12934	0.074402	51	76.596863	56.046885	64.020962	55	26	38	186	208	82	89	286	0	305	665
Q15311-P82673	0.097286	193	60.010000	62.845008	70.619969	48	291	80	236	31	162	74	56	0	655	323
Q15363-P13535	0.073403	114	63.420526	71.995920	71.755627	22	95	62	22	137	875	865	60	0	201	1937
Q15369-O60645	0.033091	10	85.938000	83.640357	88.084564	52	46	7	7	429	274	25	17	0	112	745
Q15393-O00712	0.564092	314	73.668057	90.003640	53.246905	800	380	24	13	48	112	36	224	5	1217	420
Q15393-P15313	0.031339	3	51.323333	87.632506	82.832320	595	577	33	12	196	252	23	42	0	1217	513
Q15436-Q9NP66	0.333217	123	78.698049	87.892549	66.292622	468	229	42	26	18	196	16	117	0	765	347
Q15438-P22234	0.076745	43	80.548837	81.298693	92.122047	145	179	40	34	323	92	7	3	0	398	425
Q15459-Q0JRZ9	0.216780	349	60.666390	61.462837	69.089074	125	214	118	336	257	249	28	276	11	793	810
Q15477-P62314	0.036478	23	73.983913	76.299526	74.224622	331	596	132	187	49	30	5	35	0	1246	119
Q15561-Q15973	0.273686	139	74.451151	71.298917	70.431282	121	149	49	115	10	214	58	69	0	434	351
Q15631-Q8WYQ3	0.031519	8	61.827500	91.749737	58.116620	184	31	11	2	25	14	33	70	0	228	142
Q15691-P36542	0.187230	81	79.177531	72.392612	83.715101	76	99	21	72	150	102	22	24	0	268	298
Q15796-P21399	0.230758	90	79.642778	69.951456	92.543183	130	168	32	137	688	197	4	0	0	467	889
Q15910-O43464	0.040672	135	51.182889	62.708660	66.735393	42	316	135	253	120	136	52	150	0	746	458
Q16186-Q52LJ0	0.032597	35	52.734571	58.903538	65.821824	15	146	75	171	18	216	73	126	0	407	433
Q16539-P61353	0.299764	97	81.416804	88.059500	86.334706	226	103	23	8	50	80	3	3	0	360	136
Q16829-Q9BYD3	0.309148	167	73.121796	68.227160	76.403215	101	152	30	136	116	118	10	67	0	419	311
Q32P51-Q14558	0.046910	37	74.104865	64.435281	85.037444	72	100	10	138	240	61	15	40	0	320	356
Q5J8M3-P63010	0.035318	33	64.016061	61.259071	76.187321	0	84	36	63	102	668	40	127	0	183	937
Q5TYX0-P49336	0.120926	112	69.246161	81.887815	71.268728	192	196	52	36	157	130	56	121	0	476	464
Q5UCC4-O60508	0.031402	4	72.665000	67.678931	79.171399	16	137	33	76	281	133	95	70	0	262	579
Q5VIR6-O14530	0.033038	14	74.615000	78.783858	80.172257	254	406	67	105	112	70	11	33	0	832	226
Q5VT52-Q9H6D8	0.047786	149	53.829933	44.301369	61.702009	120	125	71	1145	9	93	40	92	0	1461	234
Q5VU92-Q9P086	0.056777	65	67.942769	76.716436	78.233761	190	136	57	80	12	81	16	8	0	463	117
Q6EKJ0-P13804	0.133207	106	71.075566	72.951686	86.150721	302	376	51	220	194	110	11	18	0	949	333
Q6I9Y2-Q9UQ74	0.044683	24	82.625417	81.546765	84.604178	73	95	24	12	251	111	27	37	0	204	426
Q6IBW4-Q9H5I1	0.123941	137	66.655693	51.630678	82.436000	8	102	181	314	175	167	34	34	0	605	410
Q6IN85-P22079	0.146255	76	77.579737	72.929448	89.095843	252	332	33	216	488	160	41	23	0	833	712
Q6IPX1-P08865	0.033314	26	61.895385	58.596521	74.844203	60	163	85	241	146	61	14	74	0	549	295
Q6P1J9-O95630	0.036783	29	69.437241	70.734143	79.872406	111	196	93	131	161	185	21	57	0	531	424
Q6P1K8-O75934	0.031322	0	0.000000	80.599975	82.271600	153	146	69	27	83	101	31	10	0	395	225
Q6P1M3-P26439	0.093691	50	80.228600	78.270373	89.909086	389	398	79	154	226	136	9	1	0	1020	372
Q6VN20-Q8WYJ6	0.035198	62	53.999194	73.426694	75.045860	270	158	20	172	80	188	50	54	0	620	372
Q7L2H7-P38919	0.031828	9	72.022222	58.684973	80.146959	0	34	296	44	92	248	46	25	0	374	411
Q7L2H7-P39019	0.031328	2	46.865000	54.430080	78.225862	0	27	225	122	0	125	18	2	0	374	145
Q7L2H7-P52815	0.032095	34	48.664706	64.970160	50.563939	6	125	206	37	0	33	53	112	0	374	198
Q7L2H7-Q9P2T1	0.032937	15	72.000667	75.388797	92.277701	1	292	72	9	282	51	11	4	0	374	348
Q7L523-O14530	0.049165	43	72.312326	87.380415	79.526858	188	99	13	13	103	77	15	31	0	313	226
Q7L5D6-O75366	0.049008	69	64.167826	79.746024	74.788852	164	94	15	54	69	519	156	75	0	327	819
Q7L5D6-P08621	0.044722	48	67.855417	82.567920	66.634943	222	38	18	49	41	203	76	117	0	327	437
Q7L5N1-O95704	0.213759	199	66.971558	77.517187	62.375720	90	158	41	38	75	173	44	194	0	327	486
Q7L5N1-Q6V9R5	0.052247	116	58.310690	74.879480	59.291878	57	177	51	42	4	159	106	157	0	327	426
Q7L804-P30405	0.086552	55	77.269455	55.680605	84.777246	82	84	28	318	157	7	3	40	0	512	207
Q7RTV2-Q9UNF0	0.041156	53	63.645472	93.609279	77.547819	188	32	1	1	284	61	13	128	0	222	486
Q7Z6K3-Q9Y676	0.031740	14	57.680714	81.083259	67.558372	244	64	31	63	77	56	47	78	0	402	258
Q7Z7F7-Q96AB6	0.049569	42	72.962619	62.433516	92.563065	4	49	33	42	258	41	9	2	0	128	310
Q86TG7-Q9UHD9	0.035452	57	55.623684	68.748305	50.406522	175	221	91	221	42	84	142	356	0	708	624
Q86W42-Q9BS26	0.218588	62	86.167419	90.677625	81.060197	266	57	11	7	156	183	18	49	0	341	406
Q86YD7-Q96EB1	0.191113	130	71.688846	38.403147	73.757901	0	25	24	415	172	93	55	104	0	464	424
Q86YR6-Q9UQB8	0.181064	204	65.118186	64.781353	65.041975	143	180	24	237	224	78	8	242	0	584	552
Q8IUE1-Q8TD55	0.033393	34	57.537941	57.055353	57.196469	41	37	23	140	56	99	83	252	0	241	490
Q8IUR7-Q05901	0.031581	5	85.248000	90.401798	79.856135	516	120	21	16	160	218	29	51	0	673	458
Q8IX94-P46783	0.033328	21	66.308571	67.022381	69.584727	208	202	64	303	61	33	12	59	0	777	165
Q8IZL8-P22102	0.185630	193	66.035026	56.091053	88.898634	111	319	114	586	674	283	28	25	0	1130	1010
Q8N0Y7-Q9C086	0.060342	42	77.040000	94.102323	59.448848	226	23	4	1	11	119	65	161	0	254	356
Q8N142-P67936	0.061817	31	84.331613	90.241291	83.598347	342	83	9	23	52	173	21	2	0	457	248
Q8N1C3-P07910	0.087721	78	71.238846	73.945613	59.938889	164	154	35	112	64	56	32	154	0	465	306
Q8N4V1-O75787	0.036635	43	61.932326	70.826947	76.495829	29	34	43	25	34	216	83	17	0	131	350
Q8N5N7-Q06190	0.034122	41	57.221463	65.779304	56.120000	28	62	12	56	306	69	163	612	0	158	1150
Q8N752-P81877	0.328839	159	74.553396	89.665994	46.990886	262	40	17	18	30	51	8	272	0	337	361
Q8N766-Q9NYS7	0.040176	72	58.296111	80.583817	81.146832	268	564	96	65	194	126	27	57	0	993	404
Q8N7H5-O75152	0.123070	220	60.738273	64.301431	48.515198	56	161	145	169	3	165	86	556	0	531	810
Q8N7H5-Q9NQC1	0.042936	133	52.768797	59.883766	59.659570	26	172	105	228	85	253	93	359	0	531	790
Q8NEY4-P05388	0.031941	10	71.486000	75.705457	70.554322	65	263	38	61	0	226	44	47	0	427	317
Q8NFZ3-P09417	0.070337	54	74.661481	75.463554	92.381762	402	150	67	197	204	30	2	8	0	816	244
Q8NHQ8-Q8WVT3	0.032163	37	48.266216	67.735967	63.063143	44	218	15	142	133	271	29	302	0	419	735
Q8NI27-Q9H7B2	0.050594	116	57.744741	71.651023	77.751601	504	568	100	421	89	132	58	27	0	1593	306
Q8TAA3-O14802	0.038924	28	73.350000	82.370117	82.940403	86	124	37	9	327	907	131	25	0	256	1390
Q8TAQ2-Q9UBU8	0.094558	163	61.710368	60.066400	70.465387	267	229	122	596	136	96	19	111	0	1214	362
Q8TAT6-P12955	0.118734	69	76.955652	83.053980	94.195842	241	297	24	46	448	28	9	8	0	608	493
Q8TC44-P11021	0.127879	107	70.507944	74.513201	83.551820	241	92	18	127	297	259	66	32	2	478	654
Q8TEW0-Q5VTL8	0.061147	200	54.518600	51.723650	62.656923	155	238	101	862	128	137	43	238	3	1356	546
Q8WUM0-Q9NQ50	0.038977	27	74.226667	75.049784	58.008107	102	778	132	144	1	72	42	91	0	1156	206
Q8WV22-Q13227	0.039752	37	68.607838	87.979662	54.888593	199	32	17	18	62	39	18	208	0	266	327
Q8WVC0-Q8N205	0.056701	149	56.659530	51.413438	48.634530	1	113	136	416	0	98	41	265	0	666	404
Q8WVV5-P17861	0.161954	101	73.865446	81.657323	56.650077	227	199	61	36	19	78	26	138	0	523	261
Q8WWU7-P08865	0.119272	48	84.227292	85.259938	75.471661	230	47	8	40	132	75	16	72	0	325	295
Q8WX92-P42696	0.240200	158	71.197342	82.196172	56.431465	152	346	55	27	11	147	59	213	0	580	430
Q8WYJ6-P30281	0.219084	101	77.081188	74.722285	81.018390	35	237	52	48	133	106	11	42	0	372	292
Q92526-Q8TAF3	0.038635	29	72.216207	86.837302	81.533973	269	224	30	7	297	258	55	67	0	530	677
Q92526-Q9BWE0	0.147476	107	71.985981	85.686283	65.135732	206	282	34	8	0	336	92	139	0	530	567
Q92526-Q9UKV3	0.254859	229	66.905677	85.675377	42.636779	169	326	29	6	4	188	121	1028	0	530	1341
Q92552-P63173	0.031358	3	70.330000	76.174686	87.225571	27	299	36	52	20	49	1	0	0	414	70
Q92599-Q9Y5K6	0.229969	222	66.300856	75.643002	54.228106	141	206	42	94	93	134	26	386	0	483	639
Q92665-P22626	0.035142	38	61.139211	56.718253	62.073768	0	142	60	193	17	149	23	164	0	395	353
Q92665-P36959	0.034519	25	67.326800	53.438759	93.368551	13	116	54	212	285	55	4	1	0	395	345
Q92665-P42677	0.031931	15	60.588000	60.702076	88.708810	49	112	64	170	54	25	4	1	0	395	84
Q92665-P60900	0.212348	131	72.647099	54.156532	90.810447	4	124	64	203	185	54	3	4	0	395	246
Q92665-Q96RN5	0.032931	50	49.811600	57.252228	58.096193	6	129	75	185	41	286	84	377	0	395	788
Q92769-O60826	0.065117	42	78.394524	82.113074	68.083573	345	22	27	94	11	363	91	162	0	488	627
Q92845-Q5M8T2	0.257171	172	70.719070	80.978157	71.438654	475	160	35	122	102	189	12	113	0	792	416
Q92922-P31943	0.033587	61	50.048197	62.675656	61.418886	216	295	116	478	40	194	25	190	0	1105	449
Q92922-P33316	0.095497	132	64.481818	62.251339	66.950635	221	285	122	477	89	43	24	96	0	1105	252
Q92922-P54727	0.034090	74	49.286622	64.027077	60.448020	278	254	118	455	27	185	17	180	2	1105	409
Q92922-Q8N9F7	0.036836	57	57.908421	61.357955	88.721879	181	319	119	486	203	89	21	1	2	1105	314
Q93050-Q9Y496	0.050025	62	66.272581	79.061051	68.063376	127	573	68	69	71	322	140	166	0	837	699
Q969N2-Q13227	0.079738	94	67.160745	84.319273	48.473731	306	172	81	19	10	87	15	215	0	578	327
Q969U7-Q8WUM4	0.144310	121	69.921901	86.647841	79.543606	161	71	26	6	437	247	29	155	0	264	868
Q96B26-P36578	0.031385	4	67.612500	88.210978	77.494965	130	139	6	1	171	138	54	64	0	276	427
Q96C36-Q9UH99	0.096912	109	67.275963	87.027094	56.624365	255	18	15	32	87	128	170	332	2	320	717
Q96CW1-Q92871	0.197494	56	87.089107	84.372276	89.802481	228	141	35	31	195	53	7	7	0	435	262
Q96CW5-P17252	0.137899	103	71.877767	73.596858	78.830432	196	453	70	188	231	289	67	85	0	907	672
Q96DE5-P43358	0.031762	11	64.158182	60.984636	71.804069	1	36	36	37	136	59	25	97	0	110	317
Q96DE5-P46778	0.031335	2	71.005000	58.966455	91.004750	11	27	22	50	110	50	0	0	0	110	160
Q96DV4-Q13200	0.034340	48	55.509167	66.639105	70.244460	16	212	54	98	0	564	266	78	0	380	908
Q96E14-P05387	0.031322	0	0.000000	83.648844	62.380000	79	45	10	13	0	53	19	43	0	147	115
Q96EB1-P28065	0.032152	20	58.037500	68.974175	85.800091	90	155	62	117	139	53	10	17	0	424	219
Q96EY7-O15514	0.036206	41	62.001707	77.430755	80.121831	293	200	90	106	31	86	13	12	0	689	142
Q96EY7-O75794	0.092831	43	83.317209	76.453106	77.941577	264	218	98	109	122	120	50	44	0	689	336
Q96EY7-P46783	0.032028	29	50.112069	76.670842	65.535818	272	214	100	103	57	35	3	70	0	689	165
Q96EY7-Q53GT1	0.197104	77	80.681948	73.021872	84.179937	177	284	73	155	371	185	16	62	0	689	634
Q96EY7-Q9Y265	0.043934	76	60.202763	70.796647	80.478114	125	328	61	175	91	299	25	41	2	689	456
Q96FX7-P62937	0.032888	10	84.258000	89.891142	95.865394	209	55	23	2	157	7	1	0	0	289	165
Q96G04-P53582	0.361404	115	80.893826	88.078939	89.768731	206	95	25	4	283	68	15	20	0	330	386
Q96G04-Q8WYQ3	0.095327	80	71.829625	91.273636	52.019296	246	66	18	0	0	38	20	84	0	330	142
Q96G04-Q9HD33	0.047603	38	73.950000	89.773303	70.808680	228	82	20	0	55	106	30	59	0	330	250
Q96G25-P05386	0.049031	36	75.829167	65.155261	60.657368	12	133	41	82	0	50	21	43	0	268	114
Q96G25-P36543	0.038334	23	77.125217	63.503433	89.133628	13	136	28	91	141	76	8	1	0	268	226
Q96GM5-Q9Y3D9	0.036183	40	62.374250	73.782078	63.690368	178	173	35	129	3	94	32	61	0	515	190
Q96IY1-P62424	0.101823	63	76.790317	64.373203	84.097556	10	130	45	96	137	83	31	15	0	281	266
Q96IY1-Q14190	0.032918	65	46.619077	50.364484	58.285097	0	66	64	151	181	99	54	333	0	281	667
Q96J01-P19338	0.050508	51	69.776275	88.345071	58.613732	281	28	9	33	29	268	27	386	0	351	710
Q96LI5-Q9Y570	0.165476	105	73.472476	86.137477	78.614016	345	134	39	37	222	71	10	83	0	555	386
Q96QC0-Q9UBQ0	0.077824	97	66.399381	49.085277	89.229835	111	81	79	669	115	59	8	0	0	940	182
Q96QK1-Q9P2Y4	0.452701	327	69.154434	85.526910	47.934404	271	475	45	5	4	191	62	465	0	796	722
Q96RQ3-Q96AJ1	0.131020	112	70.075804	85.126814	68.431574	420	213	31	61	49	216	26	122	0	725	413
Q96S59-P12524	0.260656	188	69.654787	71.167284	50.381786	313	131	42	243	61	25	29	249	0	729	364
Q96S59-P28074	0.216684	180	68.397222	68.363580	78.189544	259	171	34	265	152	48	4	59	0	729	263
Q96S59-Q6P2C8	0.055445	121	58.770413	69.435720	74.071865	299	132	38	260	79	125	47	60	0	729	311
Q99436-O43639	0.042235	51	65.121569	84.160975	73.211079	160	83	10	24	99	179	9	93	0	277	380
Q99436-Q9ULD6	0.033009	51	49.943529	82.477690	60.962187	150	74	25	28	62	391	128	361	0	277	942
Q99460-P04406	0.034982	14	83.755714	78.095278	93.506985	189	602	72	90	298	35	2	0	0	953	335
Q99460-P05386	0.031510	7	65.298571	72.711658	55.645439	51	604	201	97	0	46	15	53	0	953	114
Q99460-P38117	0.033219	12	80.529167	77.608520	89.649608	203	575	78	97	142	110	2	1	0	953	255
Q99460-Q09028	0.033495	15	75.488667	77.600294	84.596659	204	573	85	91	224	150	19	32	0	953	425
Q99460-Q13547	0.133581	75	76.802133	79.445383	79.008880	259	544	57	93	288	77	17	100	0	953	482
Q99460-Q6IC98	0.276038	153	73.123922	77.440997	58.628028	192	572	96	93	0	223	140	215	0	953	578
Q99460-Q99873	0.106856	69	75.717391	80.362791	84.745418	280	530	54	89	254	63	7	47	0	953	371
Q99460-Q9UGJ1	0.077087	69	71.612464	77.636233	74.719490	211	568	80	94	65	442	57	103	0	953	667
Q99460-Q9Y3D5	0.031505	10	54.870000	76.974932	64.148873	158	604	101	90	22	53	16	51	0	953	142
Q99460-Q9Y5T5	0.156547	104	73.046923	78.731941	63.075383	211	578	75	89	116	295	127	285	0	953	823
Q99471-O75683	0.043404	22	83.898182	88.057468	70.387368	92	55	4	3	93	123	40	105	0	154	361
Q99547-Q9UBU8	0.035467	40	60.995000	66.028500	72.384779	0	63	91	6	77	158	30	97	0	160	362
Q99567-Q502X0	0.032077	9	77.765556	75.473144	89.545949	185	348	99	109	51	27	1	0	0	741	79
Q99613-P35268	0.033152	22	64.368636	70.569376	77.968125	78	499	128	208	41	55	11	21	0	913	128
Q99613-P62316	0.032950	31	56.854194	70.939540	81.588390	109	477	108	219	43	55	16	4	0	913	118
Q99613-Q96JM7	0.067062	175	57.094857	70.391796	66.101667	147	438	93	235	143	295	85	257	6	913	780
Q99613-Q99567	0.184495	233	63.698369	68.091073	70.432119	45	519	102	247	28	459	132	122	11	913	741
Q99613-Q9UQ80	0.051089	52	69.679808	70.828204	87.634365	135	455	97	226	278	74	9	33	0	913	394
Q99623-Q15906	0.040294	27	75.774074	87.991003	60.688819	204	55	39	1	7	121	114	122	0	299	364
Q99627-Q07955	0.031322	0	0.000000	77.617703	69.041411	4	162	17	26	47	103	12	86	0	209	248
Q99627-Q9H8H2	0.045038	30	77.454000	77.540287	66.075746	51	111	15	32	250	220	42	339	0	209	851
Q99832-P63027	0.084790	55	76.991091	87.384494	72.888707	335	157	30	21	15	68	16	17	0	543	116
Q99832-Q13084	0.031590	5	85.874000	86.316041	80.747891	285	205	31	22	68	141	34	13	0	543	256
Q99832-Q16576	0.244642	124	74.974113	85.403131	86.722729	277	208	32	26	290	87	11	37	0	543	425
Q99832-Q9NPI1	0.110581	91	71.452637	86.483517	53.000783	307	177	34	25	87	88	107	369	0	543	651
Q99832-Q9NQ29	0.039882	29	73.717586	85.920258	65.487385	272	220	27	24	6	210	40	115	0	543	371
Q99832-Q9UBU8	0.114203	100	70.337500	86.198619	69.705414	290	195	33	25	86	147	14	115	0	543	362
Q99848-O43402	0.031322	0	0.000000	70.569379	88.641286	22	156	75	53	150	41	8	11	0	306	210
Q99871-P28331	0.039006	25	76.038400	60.588478	89.596644	39	83	114	132	550	138	5	34	0	368	727
Q9BSI4-Q16531	0.603041	365	73.530027	51.674989	88.333088	38	117	45	251	698	373	46	23	5	451	1140
Q9BSJ2-Q9Y3B9	0.047786	74	62.583514	75.307273	51.634574	227	378	185	112	0	73	70	139	0	902	282
Q9BT78-Q00341	0.178666	123	71.829593	85.433670	73.667603	104	286	16	0	4	975	127	162	0	406	1268
Q9BT78-Q9Y5G6	0.211454	150	70.641267	88.731034	70.422639	214	183	8	1	192	427	61	252	0	406	932
Q9BUE0-O60832	0.038285	25	75.057600	81.059375	76.616790	73	102	17	16	263	110	26	115	0	208	514
Q9BUE0-P28074	0.126099	99	71.551616	78.010769	79.073536	34	136	20	18	156	44	4	59	0	208	263
Q9BUE0-Q9HBG6	0.051995	68	65.597206	78.483125	82.869718	52	116	20	20	480	630	37	94	0	208	1241
Q9BYD1-P48637	0.060672	28	86.526786	85.908371	92.422890	93	70	9	6	373	85	15	1	0	178	474
Q9BYD2-P20042	0.031574	6	76.098333	79.587678	64.538859	145	58	16	48	79	65	46	143	0	267	333
Q9BYD3-P61006	0.212454	80	80.828750	77.322186	80.433140	144	89	5	73	101	65	12	29	0	311	207
Q9BYD3-Q01523	0.206897	91	78.226813	81.518039	65.474894	184	56	17	54	17	34	10	33	0	311	94
Q9BZ67-P05362	0.076022	38	83.136316	72.971875	86.406692	176	131	32	125	355	116	25	36	0	464	532
Q9BZD4-P37275	0.193749	196	66.239745	86.326961	45.609626	220	214	23	7	29	203	41	851	0	464	1124
Q9BZE1-Q9UNX3	0.031322	0	0.000000	79.570993	89.465586	194	133	37	59	107	31	7	0	0	423	145
Q9BZJ0-O14972	0.059884	84	64.869048	73.512936	84.423670	321	285	51	191	127	129	34	7	0	848	297
Q9BZJ0-Q7Z7C8	0.103121	139	64.606115	74.097559	59.098871	310	292	58	188	3	111	79	117	0	848	310
Q9BZJ0-Q96E09	0.295645	200	70.148750	74.248950	37.711986	322	283	56	187	0	0	25	262	0	848	287
Q9GZV4-Q9Y6M4	0.217856	111	75.475766	82.830784	73.164139	66	65	9	13	237	55	11	144	0	153	447
Q9H009-Q9UHW5	0.036041	27	69.525556	59.879953	82.825704	3	105	16	91	129	102	41	12	0	215	284
Q9H009-Q9ULV4	0.133158	58	81.626207	62.776093	90.514241	35	78	15	87	388	49	11	26	0	215	474
Q9H074-Q9Y2Q5	0.189446	106	74.734151	69.170063	87.097520	174	96	42	167	77	32	15	1	0	479	125
Q9H0H5-P18124	0.041198	40	68.538750	67.359636	88.632218	167	187	61	217	158	76	4	10	0	632	248
Q9H0U6-P09104	0.153757	60	82.648333	68.964278	95.312788	67	32	11	70	403	29	2	0	0	180	434
Q9H0U6-Q9Y291	0.031322	0	0.000000	80.460889	85.496321	94	39	22	25	34	67	5	0	0	180	106
Q9H1D9-P38606	0.031925	7	84.150000	76.862152	90.300583	11	228	58	19	410	192	12	3	0	316	617
Q9H1D9-Q13422	0.049399	74	63.290541	80.710127	49.924566	78	186	36	16	0	137	59	323	0	316	519
Q9H2W6-P30520	0.031655	21	47.640952	74.468996	86.274496	48	157	30	44	273	142	16	25	0	279	456
Q9H2W6-Q14137	0.032105	13	67.073846	72.330215	73.978244	11	186	36	46	224	290	90	142	0	279	746
Q9H6D7-Q9NWU5	0.036443	23	73.915217	80.878898	80.982136	130	154	60	19	120	40	7	39	0	363	206
Q9H871-P50914	0.031506	9	57.553333	86.585780	69.479953	206	149	35	1	64	71	2	78	0	391	215
Q9H8S9-Q9Y4P1	0.092909	104	67.482885	77.597917	79.903715	83	85	8	40	232	68	16	77	2	216	393
Q9HAW8-Q13237	0.147029	79	76.950633	84.948660	78.453084	301	157	31	41	259	336	69	98	0	530	762
Q9HBM1-Q14839	0.046400	70	62.729571	78.956652	63.897960	4	206	13	1	204	796	249	663	0	224	1912
Q9HCE7-Q86VG3	0.168211	190	65.319158	73.653831	36.685928	261	273	47	176	0	7	20	194	0	757	221
Q9HCS7-P36959	0.060028	32	82.980938	79.736456	92.206609	159	554	47	95	271	66	6	2	0	855	345
Q9HD33-O43681	0.051399	43	73.336047	72.043000	74.782989	60	111	18	61	116	85	99	48	0	250	348
Q9HD33-P01889	0.074093	62	72.913065	65.926840	82.088564	33	93	57	67	208	84	18	52	0	250	362
Q9HD33-P31146	0.049077	44	71.830455	69.699480	88.901584	49	106	35	60	338	90	13	20	0	250	461
Q9HD33-Q13901	0.039198	45	64.506444	76.681040	81.584043	103	76	15	56	51	65	17	8	0	250	141
Q9NP92-P15884	0.081471	82	69.514756	84.478132	44.681589	282	81	33	43	40	56	46	525	0	439	667
Q9NP92-Q16629	0.159842	68	80.640735	83.631731	58.851092	241	124	29	45	20	70	33	115	0	439	238
Q9NPA0-P61011	0.083619	63	74.283968	64.680000	78.243313	24	94	47	77	137	229	94	44	0	242	504
Q9NPF4-P13639	0.122536	37	90.665676	93.397463	86.251410	287	48	0	0	380	410	61	7	0	335	858
Q9NPF4-Q9NP92	0.080851	50	78.196600	95.141463	80.868064	311	24	0	0	207	147	29	56	0	335	439
Q9NPF5-Q16531	0.512898	198	77.938333	60.273233	88.317509	18	191	80	178	686	385	53	16	0	467	1140
Q9NPH6-O43617	0.263598	83	82.678795	81.119882	84.317667	69	72	8	21	93	63	5	19	0	170	180
Q9NQP4-Q8TDM0	0.031900	8	78.108750	87.301045	66.216493	93	25	5	11	70	14	54	73	0	134	211
Q9NQP4-Q9BYV1	0.099796	77	73.006234	83.641716	89.566109	69	43	10	12	420	50	2	42	0	134	514
Q9NQT5-O60506	0.045910	64	63.823594	72.588109	63.630963	22	177	34	42	8	330	69	216	0	275	623
Q9NQT5-Q9BPZ2	0.031322	0	0.000000	66.755200	70.822287	2	136	89	48	33	147	17	61	0	275	258
Q9NQT5-Q9Y2W2	0.031798	20	52.174000	75.075055	54.998066	40	175	17	43	39	107	146	349	0	275	641
Q9NR50-P62424	0.031894	12	65.225833	72.591903	82.529737	28	283	78	63	112	103	34	17	0	452	266
Q9NSB8-P46087	0.097953	61	76.909836	81.866667	63.303633	154	145	18	37	277	100	47	388	0	354	812
Q9NSC5-Q15311	0.140440	128	68.840703	73.885291	65.151725	79	166	54	62	146	192	83	234	0	361	655
Q9NTJ3-Q8IYM1	0.254742	128	74.921719	80.715955	71.500028	68	1071	96	53	40	207	31	80	0	1288	358
Q9NUP9-O95707	0.031404	4	73.277500	82.025431	76.877500	67	99	24	7	69	88	45	18	0	197	220
Q9NUP9-Q969R2	0.067622	121	61.596364	76.995685	67.743537	40	104	42	11	275	241	103	297	0	197	916
Q9NUP9-Q9NWZ8	0.033408	19	68.983158	83.521015	62.279298	77	94	20	6	34	77	32	99	0	197	242
Q9NVA2-Q96T60	0.070493	38	81.910789	80.758252	86.180979	117	240	39	33	306	168	8	39	0	429	521
Q9NVX0-P18754	0.035347	25	69.609600	62.476000	90.547720	0	90	98	47	351	29	14	27	0	235	421
Q9NWS0-P62136	0.176477	98	75.258469	74.334517	88.019727	76	131	17	66	254	34	9	33	0	290	330
Q9NWU5-P55289	0.044212	66	62.397727	76.695243	75.174370	79	76	7	44	250	325	48	171	0	206	794
Q9NWV8-P29374	0.060840	115	60.804609	72.274316	52.280644	120	85	28	96	155	236	62	804	0	329	1257
Q9NWY4-Q9P2Y4	0.224434	66	85.200455	86.085723	54.626676	222	87	10	27	20	222	50	430	0	346	722
Q9NXC2-P46087	0.144152	73	78.144932	87.663359	60.617599	233	122	34	1	233	131	49	399	0	390	812
Q9NXF1-Q9UGM6	0.034296	38	58.943947	73.149214	87.773917	96	561	106	166	243	79	20	18	0	929	360
Q9NY12-Q13595	0.031334	3	44.050000	61.526406	54.294823	21	67	22	107	54	29	22	177	0	217	282
Q9NYF8-Q9Y5E2	0.216570	262	63.781489	34.840217	76.139546	0	7	40	873	128	478	89	98	11	920	793
Q9NYK5-P46087	0.101012	95	69.774526	79.505710	60.787414	106	174	14	44	195	171	52	394	0	338	812
Q9NYK5-P61513	0.031322	0	0.000000	83.944024	89.399239	211	77	8	42	61	28	2	1	0	338	92
Q9NYK5-Q8IY18	0.095264	42	84.203571	80.769083	79.378574	137	145	14	42	156	774	93	78	0	338	1101
Q9NZN8-P26038	0.073025	112	63.593839	48.774444	83.802132	45	73	77	345	329	156	34	58	0	540	577
Q9NZN8-P48556	0.048379	133	55.316090	47.554500	61.182943	5	101	93	341	0	149	98	103	0	540	350
Q9P015-P08865	0.031322	0	0.000000	84.304865	76.383932	165	79	45	7	159	52	11	73	0	296	295
Q9P015-Q14181	0.038719	51	61.940196	82.912568	81.544030	151	78	57	10	288	195	51	64	0	296	598
Q9P0I2-O43617	0.096722	63	76.153333	72.099387	84.627611	3	167	60	31	106	49	5	20	3	261	180
Q9P0V9-O15540	0.032947	12	78.546667	76.507621	89.007955	70	270	56	58	72	59	1	0	0	454	132
Q9P0V9-Q9NYK5	0.031348	6	37.806667	75.270991	79.815680	81	246	62	65	138	143	13	44	0	454	338
Q9P1W8-Q99653	0.393670	137	79.195547	81.936202	83.940974	219	83	36	49	74	100	15	6	0	387	195
Q9UBI1-Q13562	0.033179	30	58.634333	85.916000	54.875674	109	60	26	0	57	42	43	214	0	195	356
Q9UBI1-Q92558	0.040094	45	65.415333	80.501333	55.371288	27	129	39	0	45	118	124	272	0	195	559
Q9UBQ0-Q9BSL1	0.133985	51	84.372745	91.168187	71.276025	127	54	1	0	15	243	74	73	0	182	405
Q9UBQ5-P62888	0.031358	3	70.480000	84.701055	86.178957	84	114	19	1	86	12	11	6	0	218	115
Q9UBQ5-Q8IYS0	0.043382	59	63.586102	84.979128	65.268202	103	90	16	9	155	211	49	247	0	218	662
Q9UBQ5-Q8NEY4	0.047196	36	74.836389	88.079220	82.410164	149	49	15	5	236	116	16	59	0	218	427
Q9UBQ5-Q9ULV0	0.085014	93	68.100538	79.782339	72.855649	22	161	20	15	316	885	355	292	0	218	1848
Q9UBU8-P56385	0.035083	23	70.771739	72.403591	85.532899	84	151	29	98	26	40	3	0	0	362	69
Q9UHD8-P22061	0.069669	42	79.526190	60.643686	93.248370	131	136	27	292	190	28	6	3	0	586	227
Q9UHD8-Q12874	0.047336	50	68.625000	60.164215	81.608204	119	148	23	296	146	275	58	22	0	586	501
Q9UHD8-Q96DE5	0.042629	70	60.537429	64.099454	52.244636	162	114	43	267	0	22	28	60	0	586	110
Q9UHL0-P27169	0.039815	30	72.908667	75.733623	90.097662	166	190	40	87	243	83	29	0	0	483	355
Q9UHV9-Q00653	0.121311	97	71.456701	72.841104	74.811833	49	54	12	39	320	317	52	211	24	154	900
Q9UHV9-Q8N612	0.037643	66	56.925303	70.112727	66.108004	19	82	6	47	289	266	49	368	0	154	972
Q9UHV9-Q9BZJ0	0.032554	53	46.945660	71.642468	73.910224	33	70	9	42	317	288	60	183	0	154	848
Q9UI10-P55735	0.371776	133	78.870602	74.121013	85.536429	219	135	44	125	204	70	25	23	0	523	322
Q9UI10-Q12874	0.035928	34	64.761471	73.666405	81.084032	217	141	32	133	138	278	61	24	0	523	501
Q9UIV1-Q8IUZ0	0.072975	59	73.580508	86.065754	73.723353	195	57	5	28	215	264	52	155	0	285	686
Q9UIV1-Q9H0U6	0.048751	25	84.258000	88.633930	75.247111	228	25	11	21	63	61	17	39	0	285	180
Q9UIV1-Q9HD33	0.078651	36	84.932500	88.131684	71.463560	219	34	13	19	73	95	23	59	0	285	250
Q9UJW0-P09001	0.032373	21	59.572381	77.227304	76.349914	100	241	66	53	120	138	38	52	0	460	348
Q9UJW0-Q00765	0.083330	60	75.122833	78.057804	78.158095	126	223	56	55	1	156	26	6	0	460	189
Q9UJX2-Q14683	0.070995	58	73.486034	81.770000	78.570527	213	293	37	54	39	1005	157	32	0	597	1233
Q9UJX2-Q92769	0.395044	101	84.480495	82.974606	79.849570	300	205	34	58	309	57	13	109	0	597	488
Q9UJX5-Q9NWU5	0.078322	88	67.924318	76.765520	76.155583	176	428	109	95	76	82	8	40	0	808	206
Q9UK41-Q9HCS7	0.031987	18	57.729444	79.280181	79.973076	52	128	19	22	174	541	45	95	0	221	855
Q9UKX7-P61586	0.043745	22	84.189091	58.588718	92.486218	113	66	46	243	167	12	12	2	0	468	193
Q9ULR0-P62891	0.031341	2	86.510000	78.738491	88.162353	80	138	43	24	27	23	0	1	0	285	51
Q9UMS4-Q8TDN6	0.038070	19	81.710526	85.768710	77.740057	273	178	23	30	145	108	47	53	0	504	353
Q9UMS4-Q9UBI1	0.066479	46	76.876522	87.711290	79.819744	333	119	23	29	3	158	33	1	2	504	195
Q9UMW8-P34059	0.580453	146	85.808904	78.638898	90.165996	159	128	24	61	392	92	10	28	0	372	522
Q9UN37-Q06546	0.105420	89	71.271910	84.669611	64.031542	223	162	26	26	95	158	30	171	0	437	454
Q9UNF0-O00522	0.037346	54	59.402222	67.404403	75.458370	92	208	30	156	214	315	84	123	0	486	736
Q9UNM6-Q9BTT4	0.031574	11	56.832727	64.927154	73.823333	0	107	246	23	1	91	36	7	0	376	135
Q9UNM6-Q9BZE4	0.031322	0	0.000000	79.725691	75.567965	4	323	48	1	134	307	130	63	0	376	634
Q9UNP9-O60832	0.072049	69	70.680435	80.623189	75.880331	136	104	20	41	229	127	51	107	0	301	514
Q9UNP9-P46976	0.050718	53	69.189811	80.832259	78.147229	155	84	10	52	163	98	34	55	0	301	350
Q9UNP9-Q96HL8	0.051927	79	63.321646	78.581495	69.863626	125	110	10	56	71	131	58	82	0	301	342
Q9UNP9-Q9H4A4	0.278068	126	76.142698	80.789003	92.946246	183	55	8	55	560	66	9	15	0	301	650
Q9UNX3-O15335	0.104386	32	92.163750	86.552483	90.796546	89	37	16	3	299	24	9	27	0	145	359
Q9UNX3-P31943	0.032411	17	64.407059	86.462483	59.108864	84	44	16	1	0	203	58	188	0	145	449
Q9UNX3-P62318	0.031322	0	0.000000	90.281241	76.659048	110	32	3	0	60	15	30	21	0	145	126
Q9UNX3-Q00403	0.031322	0	0.000000	85.942552	81.294968	68	61	16	0	131	113	64	8	0	145	316
Q9UNX3-Q14155	0.033881	38	57.628947	85.815862	65.323325	88	34	19	4	113	342	48	300	0	145	803
Q9UNX3-Q16539	0.038958	21	80.328095	82.041862	89.133861	51	70	9	15	245	89	18	8	0	145	360
Q9UNX3-Q9BYD2	0.031350	3	63.590000	90.226069	81.048052	111	27	7	0	164	43	13	47	0	145	267
Q9UNX3-Q9BYD3	0.031322	0	0.000000	88.882000	79.380032	106	29	10	0	172	66	12	61	0	145	311
Q9UNX3-Q9NRW1	0.031851	7	82.048571	87.670966	79.584279	99	31	15	0	95	68	8	37	0	145	208
Q9UNX3-Q9Y2R9	0.031322	0	0.000000	89.406345	83.813140	107	34	4	0	139	64	7	32	0	145	242
Q9Y262-O15540	0.422077	96	86.489896	81.122695	90.543561	162	308	61	33	91	40	1	0	0	564	132
Q9Y265-P16402	0.040362	24	78.659583	85.203882	53.273529	224	175	47	10	1	71	7	142	0	456	221
Q9Y2R9-P12318	0.371532	171	75.007018	82.938719	71.561703	122	82	7	31	132	52	30	103	0	242	317
Q9Y2R9-P30566	0.031322	0	0.000000	79.696405	94.095930	101	97	11	33	434	37	6	7	0	242	484
Q9Y2R9-P46779	0.033526	15	75.651333	83.751157	89.875547	139	64	8	31	100	31	6	0	0	242	137
Q9Y2R9-Q13084	0.031322	0	0.000000	83.863595	88.171367	139	65	6	32	155	88	12	1	0	242	256
Q9Y2R9-Q13509	0.065466	66	70.019242	76.864669	87.333978	86	104	18	34	265	155	10	20	0	242	450
Q9Y2R9-Q8IX12	0.118167	120	68.011083	79.946942	65.302165	109	90	11	32	207	407	113	423	0	242	1150
Q9Y2R9-Q9NWV8	0.045837	85	59.710353	82.109339	69.005502	124	78	7	33	81	115	32	101	0	242	329
Q9Y2X0-Q5VY09	0.256506	250	65.904360	77.789464	36.242599	265	394	119	99	0	26	20	281	0	877	327
Q9Y399-P26038	0.038554	21	79.755238	77.397264	84.014385	165	49	6	76	308	184	29	56	0	296	577
Q9Y399-P61313	0.036359	12	93.053333	78.455135	84.482647	183	33	9	71	123	37	43	1	0	296	204
Q9Y399-Q5T7P8	0.127526	73	76.760274	78.432568	68.706549	170	47	6	73	176	120	39	175	0	296	510
Q9Y399-Q71UM5	0.060864	27	87.547037	79.518412	86.965238	191	26	17	62	47	29	7	1	0	296	84
Q9Y399-Q9H211	0.186711	98	75.857857	78.830236	67.637344	175	42	7	72	70	239	71	166	0	296	546
Q9Y399-Q9NRK6	0.053714	70	65.765571	76.156959	76.780786	153	62	6	75	334	239	12	153	0	296	738
Q9Y399-Q9Y6A4	0.038887	17	86.212353	78.287297	89.148860	177	40	7	72	143	37	5	8	0	296	193
Q9Y3B2-P46060	0.053162	50	71.213000	80.335744	83.272981	22	143	23	7	297	182	56	52	0	195	587
Q9Y3D0-Q13573	0.031435	6	62.105000	86.116319	67.642351	104	44	5	10	13	236	226	61	0	163	536
Q9Y3D3-P13284	0.166590	96	74.986042	85.168248	79.313200	86	31	8	12	162	19	9	60	0	137	250
Q9Y3D9-P62995	0.031498	11	52.195455	67.992263	55.790972	20	83	32	55	59	26	19	184	0	190	288
Q9Y3D9-Q13480	0.048014	70	63.507143	67.204684	51.580836	13	92	27	58	78	56	73	487	0	190	694
Q9Y3D9-Q86TJ2	0.032112	14	65.290714	66.099105	82.298048	22	83	26	59	144	207	47	22	0	190	420
Q9Y3D9-Q8IY57	0.087096	49	79.649796	70.261632	60.335889	48	63	25	54	15	42	49	74	0	190	180
Q9Y3U8-O43513	0.031801	10	67.957000	84.504381	75.838841	48	44	12	1	73	99	24	37	0	105	233
Q9Y3U8-O75586	0.031922	13	63.786923	85.632000	72.741260	58	35	11	1	79	81	15	71	0	105	246
Q9Y3U8-O95400	0.031372	5	54.038000	86.924286	65.746276	58	42	4	1	13	150	92	86	0	105	341
Q9Y3U8-P08754	0.360560	77	88.328831	79.760857	91.061271	30	50	23	2	258	79	13	4	0	105	354
Q9Y3U8-P17540	0.032059	10	73.881000	81.583810	88.586134	39	39	26	1	331	38	11	39	0	105	419
Q9Y3U8-P22612	0.338823	83	85.935783	76.644762	92.745641	26	44	27	8	302	35	6	8	0	105	351
Q9Y3U8-P23246	0.034166	39	58.136410	80.397810	64.850736	35	39	29	2	169	132	120	286	0	105	707
Q9Y3U8-P24941	0.047836	28	80.866071	80.890190	87.336544	34	45	25	1	201	56	30	11	0	105	298
Q9Y3U8-P29401	0.031409	4	74.610000	80.749143	96.271316	42	35	22	6	602	17	2	2	0	105	623
Q9Y3U8-P35754	0.031322	0	0.000000	86.380190	91.830377	62	30	13	0	85	21	0	0	0	105	106
Q9Y3U8-P36873	0.064597	30	85.998000	80.174857	91.061146	34	41	29	1	273	19	16	15	0	105	323
Q9Y3U8-P55327	0.031823	10	68.576000	88.469333	61.019643	68	34	3	0	23	40	91	70	0	105	224
Q9Y3U8-P61978	0.033584	17	72.602353	80.404095	64.759762	22	59	23	1	62	164	48	189	0	105	463
Q9Y3U8-P68400	0.033740	14	78.751429	81.564952	87.663913	39	41	24	1	309	25	6	51	0	105	391
Q9Y3U8-Q00839	0.035315	48	57.814792	77.895810	64.572642	28	43	31	3	299	113	51	362	0	105	825
Q9Y3U8-Q13084	0.031322	0	0.000000	85.853905	90.521484	56	37	11	1	187	57	10	2	0	105	256
Q9Y3U8-Q13509	0.162273	43	90.660698	77.399429	89.636778	10	63	31	1	320	104	10	16	0	105	450
Q9Y3U8-Q4VC05	0.031322	0	0.000000	88.406381	54.812571	68	35	1	1	7	29	65	109	0	105	210
Q9Y3U8-Q53TQ3	0.075919	127	62.412362	82.458667	48.530438	40	44	20	1	1	243	103	680	0	105	1027
Q9Y3U8-Q6P9H4	0.034140	42	56.906905	83.215143	62.728829	42	43	19	1	144	136	20	255	0	105	555
Q9Y3U8-Q8IZP0	0.069739	46	77.652609	82.851143	62.432579	54	29	19	3	160	35	81	232	0	105	508
Q9Y3U8-Q8N2Q7	0.031385	4	67.537500	75.678286	74.453140	28	43	17	17	398	159	84	222	0	105	863
Q9Y3U8-Q8N7C3	0.134565	61	80.748852	78.117143	83.805116	33	42	22	8	211	119	27	30	0	105	387
Q9Y3U8-Q969G3	0.072415	58	73.777759	82.759143	66.300049	41	42	21	1	55	151	71	134	0	105	411
Q9Y3U8-Q96AT9	0.031870	8	77.292500	82.057524	95.815877	43	35	26	1	212	13	2	1	0	105	228
Q9Y3U8-Q9BSJ2	0.031322	0	0.000000	79.285333	77.518426	31	42	29	3	339	289	170	104	0	105	902
Q9Y3U8-Q9H0B3	0.042380	41	69.064146	83.108667	47.243483	51	29	24	1	125	71	123	861	0	105	1180
Q9Y3U8-Q9H165	0.231946	89	79.899663	82.227238	52.732850	48	32	22	3	35	160	115	525	0	105	835
Q9Y3U8-Q9H9Q2	0.031344	2	91.830000	84.402476	82.371629	40	52	12	1	107	114	14	29	0	105	264
Q9Y3U8-Q9NUG6	0.031322	0	0.000000	86.442857	89.941504	53	45	6	1	89	38	6	0	0	105	133
Q9Y3U8-Q9NVX0	0.173733	49	88.466735	86.172381	74.689489	46	54	4	1	44	116	42	33	0	105	235
Q9Y3U8-Q9NWU5	0.031322	0	0.000000	86.683429	82.423058	60	36	9	0	141	21	6	38	0	105	206
Q9Y3U8-Q9NX20	0.031322	0	0.000000	85.699810	85.622669	55	38	11	1	149	70	10	22	0	105	251
Q9Y3U8-Q9NZ32	0.031322	0	0.000000	78.094857	81.886283	28	46	19	12	177	166	37	37	0	105	417
Q9Y3U8-Q9NZE8	0.031322	0	0.000000	88.251714	65.189309	67	33	4	1	61	28	27	72	0	105	188
Q9Y3U8-Q9UL63	0.164786	60	83.465333	76.732476	87.788041	26	46	24	9	480	173	49	33	0	105	735
Q9Y3U8-Q9Y232	0.032998	17	69.240000	81.019619	66.026254	42	37	21	5	237	75	12	274	0	105	598
Q9Y3U8-Q9Y376	0.034665	11	90.974545	82.692190	93.641672	36	55	13	1	308	19	4	10	0	105	341
Q9Y3U8-Q9Y6G3	0.031602	6	77.938333	88.877714	62.866901	70	31	3	1	5	53	40	44	0	105	142
Q9Y496-P52298	0.047827	26	82.700000	74.046395	78.836026	172	304	89	134	56	57	31	12	0	699	156
Q9Y4E1-P05386	0.034937	69	52.110435	44.906523	64.023421	49	99	160	1012	26	33	8	47	0	1320	114
Q9Y4E1-P46781	0.256411	131	74.636718	44.044356	86.584536	41	102	118	1059	127	45	13	9	0	1320	194
Q9Y580-Q9UMS4	0.187704	104	74.943173	53.765263	87.808552	69	19	3	175	351	103	20	30	0	266	504
Q9Y5F0-P22223	0.213678	243	64.532634	72.250125	72.826996	28	548	87	135	127	427	111	164	25	798	829
Q9Y5G2-O43513	0.053783	152	55.635329	71.085811	65.057082	243	375	67	246	10	116	49	58	0	931	233
Q9Y5I2-P10253	0.441972	230	73.263174	67.161878	87.617563	77	508	93	270	725	118	25	84	0	948	952
Q9Y5I2-Q02878	0.037775	44	63.199318	70.452078	69.055104	167	431	83	267	75	74	66	73	0	948	288
Q9Y5I2-Q92785	0.405520	412	65.067670	66.868354	53.099872	61	493	121	273	0	87	131	173	74	948	391
Q9Y5I2-Q9NZM5	0.046277	87	59.616207	68.973112	62.901255	125	456	96	271	7	202	121	148	0	948	478
Q9Y5Q8-P49207	0.035242	39	60.930769	70.591773	84.442137	132	171	88	128	29	83	5	0	0	519	117
Q9Y651-Q56A73	0.237136	107	76.993832	52.057754	79.632610	48	27	10	191	130	55	21	43	0	276	249
Q9Y676-O43716	0.032779	19	65.108947	73.157713	74.885515	96	66	27	69	24	75	11	26	0	258	136
Q9Y676-P52799	0.037346	37	65.622973	72.353450	65.704264	89	72	27	70	87	74	39	133	0	258	333
Q9Y676-Q3B726	0.033830	32	60.299063	71.578450	62.102396	84	74	31	69	100	68	7	163	0	258	338
Q9Y676-Q96KS0	0.075245	54	75.663704	69.166899	63.949951	75	62	51	70	146	61	15	185	0	258	407
Q9Y676-Q9UBK7	0.031332	2	63.975000	68.385310	76.864825	71	63	48	76	100	59	31	38	0	258	228
Q9Y6X9-P30566	0.144432	88	74.904205	72.312345	92.203967	297	400	80	255	398	70	6	10	0	1032	484
