# Supplementary material for: Towards a structurally resolved human protein interaction network
Source: Research Square preprint supplement (doi:10.21203/rs.3.rs-1098605/v1), 2021-12-16

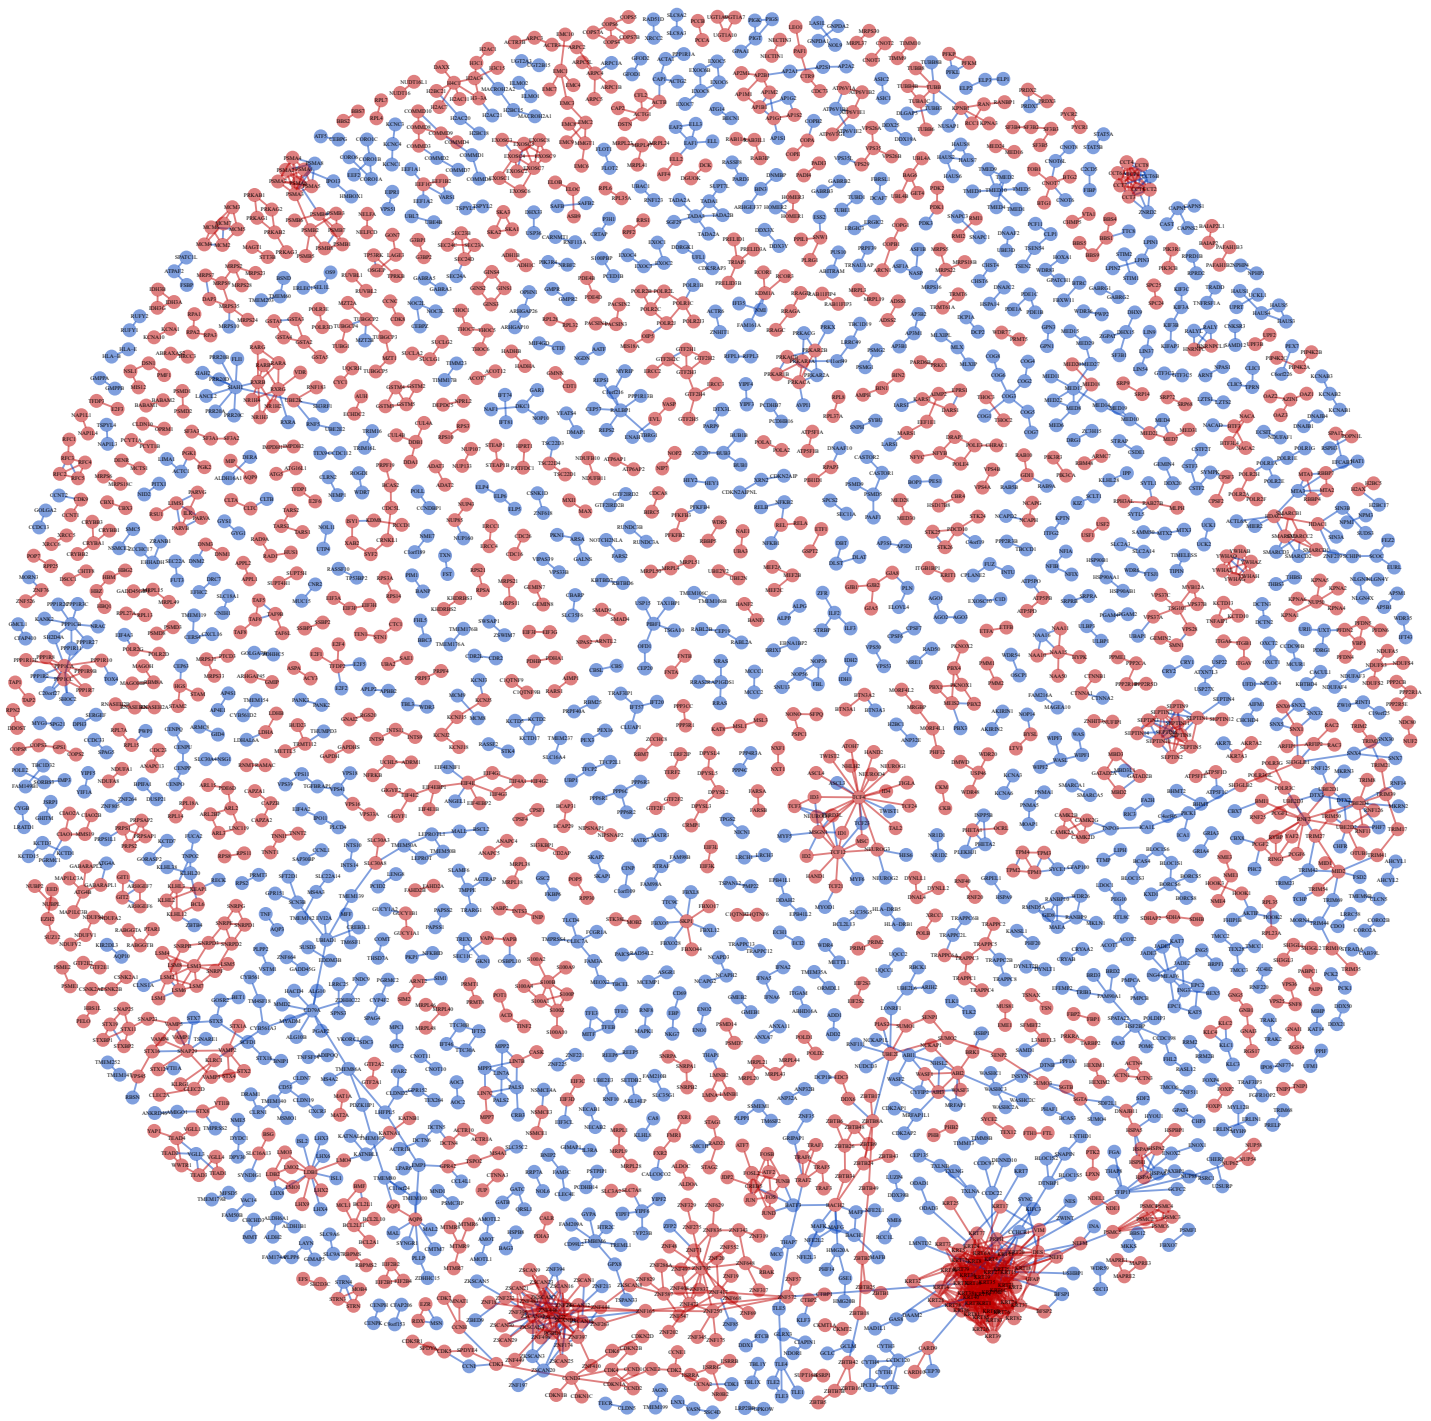

Supplement: Supplementary file [file d17e3a9a30da79d6d320538e.pdf]
